# Supplementary material
Source: publisher figshare collection journal article supplement (https://springernature.figshare.com/articles/dataset/_/22687267)

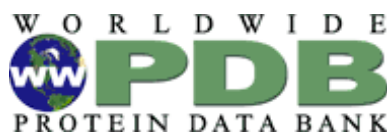

# Preliminary Full wwPDB EM Validation Report ⓘ

Mar 25, 2023 – 02:53 PM EDT

**This wwPDB validation report is NOT for manuscript review**

This is a Preliminary Full wwPDB EM Validation Report.

This report is produced by the standalone wwPDB validation server.  
**The structure in question has not been deposited to the wwPDB.**  
**This report should not be submitted to journals.**

We welcome your comments at [validation@mail.wwpdb.org](mailto:validation@mail.wwpdb.org)

A user guide is available at

<https://www.wwpdb.org/validation/2017/EMValidationReportHelp>

with specific help available everywhere you see the ⓘ symbol.

The types of validation reports are described at

<http://www.wwpdb.org/validation/2017/FAQs#types>.

---

The following versions of software and data (see [references ⓘ](#)) were used in the production of this report:

|                                |   |                                                                    |
|--------------------------------|---|--------------------------------------------------------------------|
| EMDB validation analysis       | : | 0.0.1.dev43                                                        |
| Mogul                          | : | 1.8.5 (274361), CSD as541be (2020)                                 |
| MolProbity                     | : | 4.02b-467                                                          |
| buster-report                  | : | 1.1.7 (2018)                                                       |
| Percentile statistics          | : | 20191225.v01 (using entries in the PDB archive December 25th 2019) |
| MapQ                           | : | 1.9.9                                                              |
| Ideal geometry (proteins)      | : | Engh & Huber (2001)                                                |
| Ideal geometry (DNA, RNA)      | : | Parkinson et al. (1996)                                            |
| Validation Pipeline (wwPDB-VP) | : | 2.32.1                                                             |

# 1 Overall quality at a glance i

The following experimental techniques were used to determine the structure:

*ELECTRON MICROSCOPY*

The reported resolution of this entry is unknown.

Percentile scores (ranging between 0-100) for global validation metrics of the entry are shown in the following graphic. The table shows the number of entries on which the scores are based.

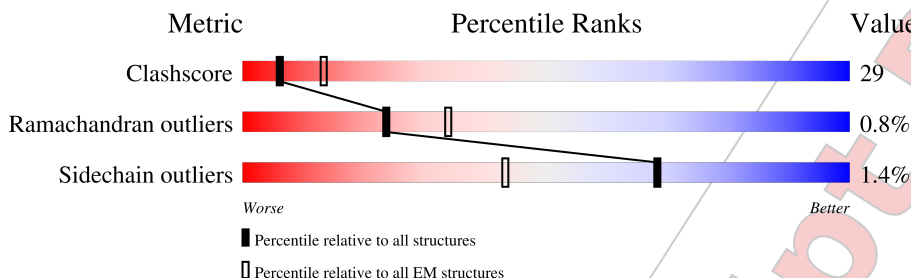

| Metric                | Whole archive<br>(#Entries) | EM structures<br>(#Entries) |
|-----------------------|-----------------------------|-----------------------------|
| Clashscore            | 158937                      | 4297                        |
| Ramachandran outliers | 154571                      | 4023                        |
| Sidechain outliers    | 154315                      | 3826                        |

The table below summarises the geometric issues observed across the polymeric chains and their fit to the map. The red, orange, yellow and green segments of the bar indicate the fraction of residues that contain outliers for  $\geq 3$ , 2, 1 and 0 types of geometric quality criteria respectively. A grey segment represents the fraction of residues that are not modelled. The numeric value for each fraction is indicated below the corresponding segment, with a dot representing fractions  $\leq 5\%$ . The upper red bar (where present) indicates the fraction of residues that have poor fit to the EM map (all-atom inclusion  $< 40\%$ ). The numeric value is given above the bar.

| Mol | Chain | Length | Quality of chain                                                       |
|-----|-------|--------|------------------------------------------------------------------------|
| 1   | A     | 619    | <div> <div>13%</div> <div>46%</div> <div>53%</div> <div>.</div> </div> |
| 1   | C     | 619    | <div> <div>15%</div> <div>47%</div> <div>52%</div> <div>.</div> </div> |
| 2   | B     | 636    | <div> <div>8%</div> <div>47%</div> <div>51%</div> <div>.</div> </div>  |
| 2   | D     | 636    | <div> <div>8%</div> <div>48%</div> <div>50%</div> <div>.</div> </div>  |

## 2 Entry composition [i](#)

There are 4 unique types of molecules in this entry. The entry contains 20730 atoms, of which 290 are hydrogens and 0 are deuteriums.

In the tables below, the AltConf column contains the number of residues with at least one atom in alternate conformation and the Trace column contains the number of residues modelled with at most 2 atoms.

- Molecule 1 is a protein.

| Mol | Chain | Residues | Atoms |      |     |     |    | AltConf | Trace |
|-----|-------|----------|-------|------|-----|-----|----|---------|-------|
| 1   | A     | 619      | Total | C    | N   | O   | S  | 0       | 0     |
|     |       |          | 4990  | 3248 | 829 | 889 | 24 |         |       |
| 1   | C     | 619      | Total | C    | N   | O   | S  | 0       | 0     |
|     |       |          | 4990  | 3248 | 829 | 889 | 24 |         |       |

- Molecule 2 is a protein.

| Mol | Chain | Residues | Atoms |      |     |     |    | AltConf | Trace |
|-----|-------|----------|-------|------|-----|-----|----|---------|-------|
| 2   | B     | 636      | Total | C    | N   | O   | S  | 0       | 0     |
|     |       |          | 5116  | 3326 | 850 | 914 | 26 |         |       |
| 2   | D     | 636      | Total | C    | N   | O   | S  | 0       | 0     |
|     |       |          | 5116  | 3326 | 850 | 914 | 26 |         |       |

- Molecule 3 is (2S)-3-(hexadecanoyloxy)-2-[(9Z)-octadec-9-enoyloxy]propyl 2-(trimethylammonio)ethyl phosphate (three-letter code: POV) (formula: C<sub>42</sub>H<sub>82</sub>NO<sub>8</sub>P).

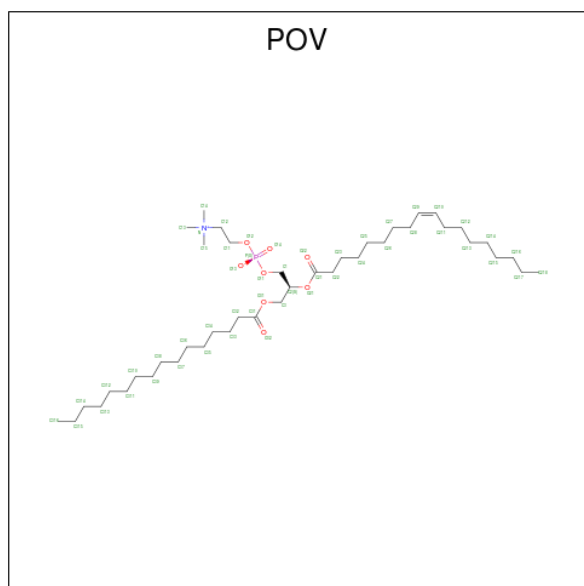

| Mol | Chain | Residues | Atoms |    |    |   |   |   | AltConf |
|-----|-------|----------|-------|----|----|---|---|---|---------|
| 3   | A     | 1        | Total | C  | H  | N | O | P | 0       |
|     |       |          | 62    | 18 | 34 | 1 | 8 | 1 |         |
| 3   | B     | 1        | Total | C  | H  | N | O | P | 0       |
|     |       |          | 134   | 42 | 82 | 1 | 8 | 1 |         |
| 3   | C     | 1        | Total | C  | H  | N | O | P | 0       |
|     |       |          | 62    | 18 | 34 | 1 | 8 | 1 |         |
| 3   | D     | 1        | Total | C  | H  | N | O | P | 0       |
|     |       |          | 134   | 42 | 82 | 1 | 8 | 1 |         |

- Molecule 4 is a ligand with the chemical component id HCO but its atom names do not match the existing wwPDB Chemical Component Dictionary definition for HCO. Consequently no firm identification of ligand chemistry can be made. Once the structure is annotated then an identification and diagram will be given here.

| Mol | Chain | Residues | Atoms |    |   |    |   |   | AltConf |
|-----|-------|----------|-------|----|---|----|---|---|---------|
| 4   | B     | 1        | Total | C  | F | H  | N | O | 0       |
|     |       |          | 63    | 26 | 3 | 29 | 3 | 2 |         |
| 4   | D     | 1        | Total | C  | F | H  | N | O | 0       |
|     |       |          | 63    | 26 | 3 | 29 | 3 | 2 |         |

### 3 Residue-property plots

These plots are drawn for all protein, RNA, DNA and oligosaccharide chains in the entry. The first graphic for a chain summarises the proportions of the various outlier classes displayed in the second graphic. The second graphic shows the sequence view annotated by issues in geometry and atom inclusion in map density. Residues are color-coded according to the number of geometric quality criteria for which they contain at least one outlier: green = 0, yellow = 1, orange = 2 and red = 3 or more. A red diamond above a residue indicates a poor fit to the EM map for this residue (all-atom inclusion < 40%). Stretches of 2 or more consecutive residues without any outlier are shown as a green connector. Residues present in the sample, but not in the model, are shown in grey.

#### • Molecule 1:

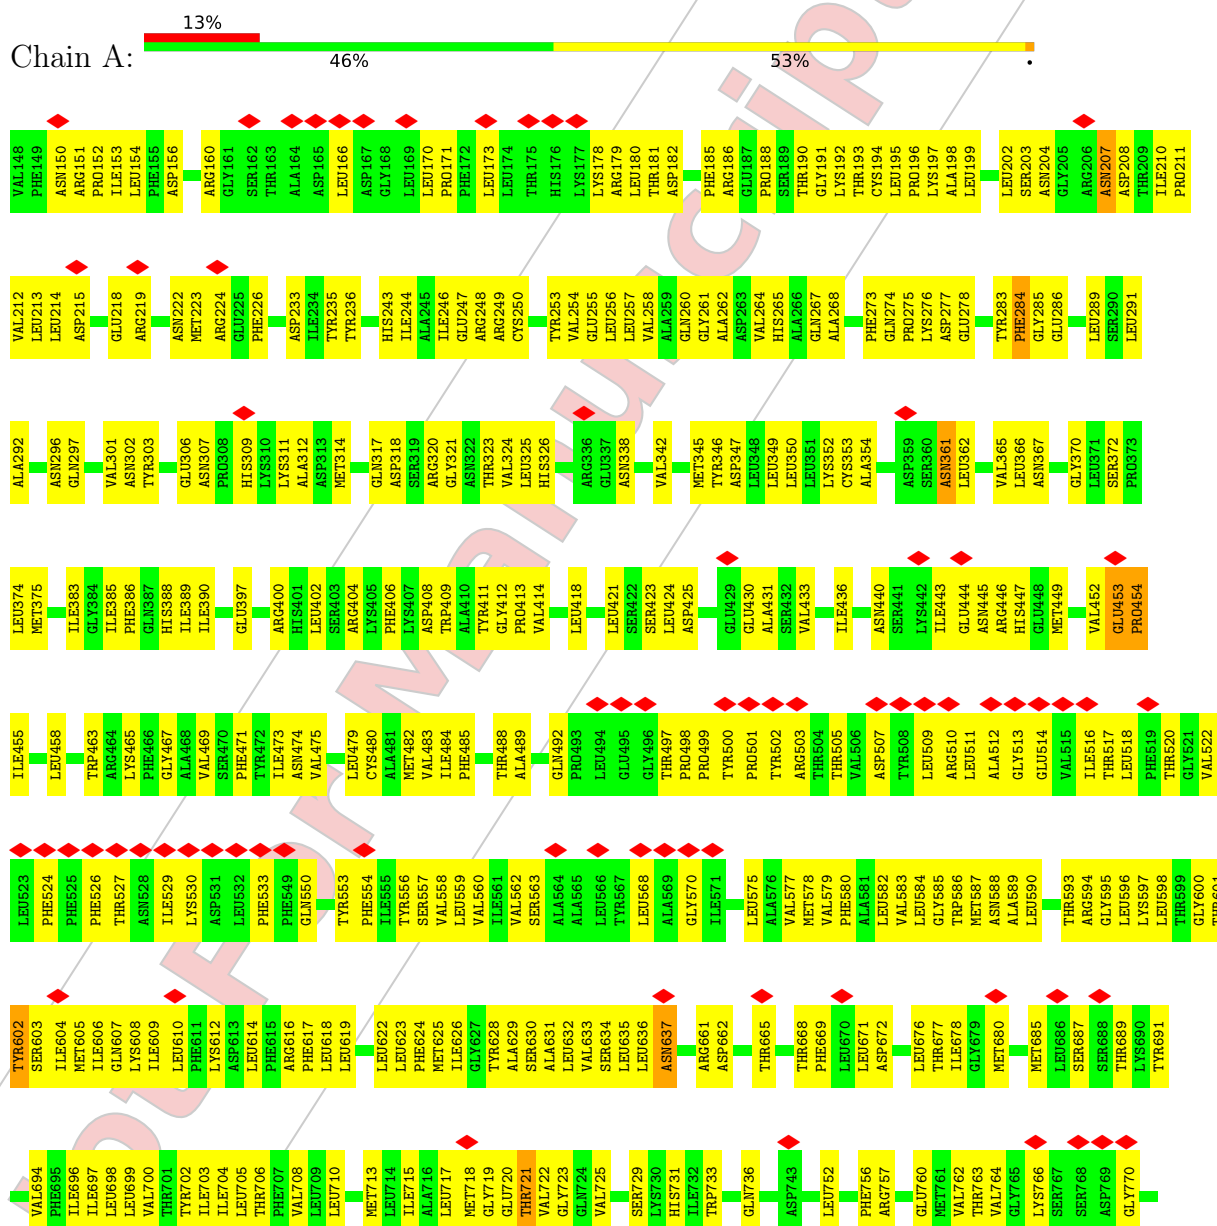

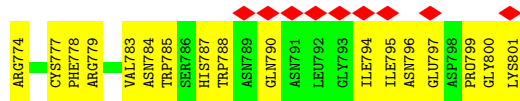

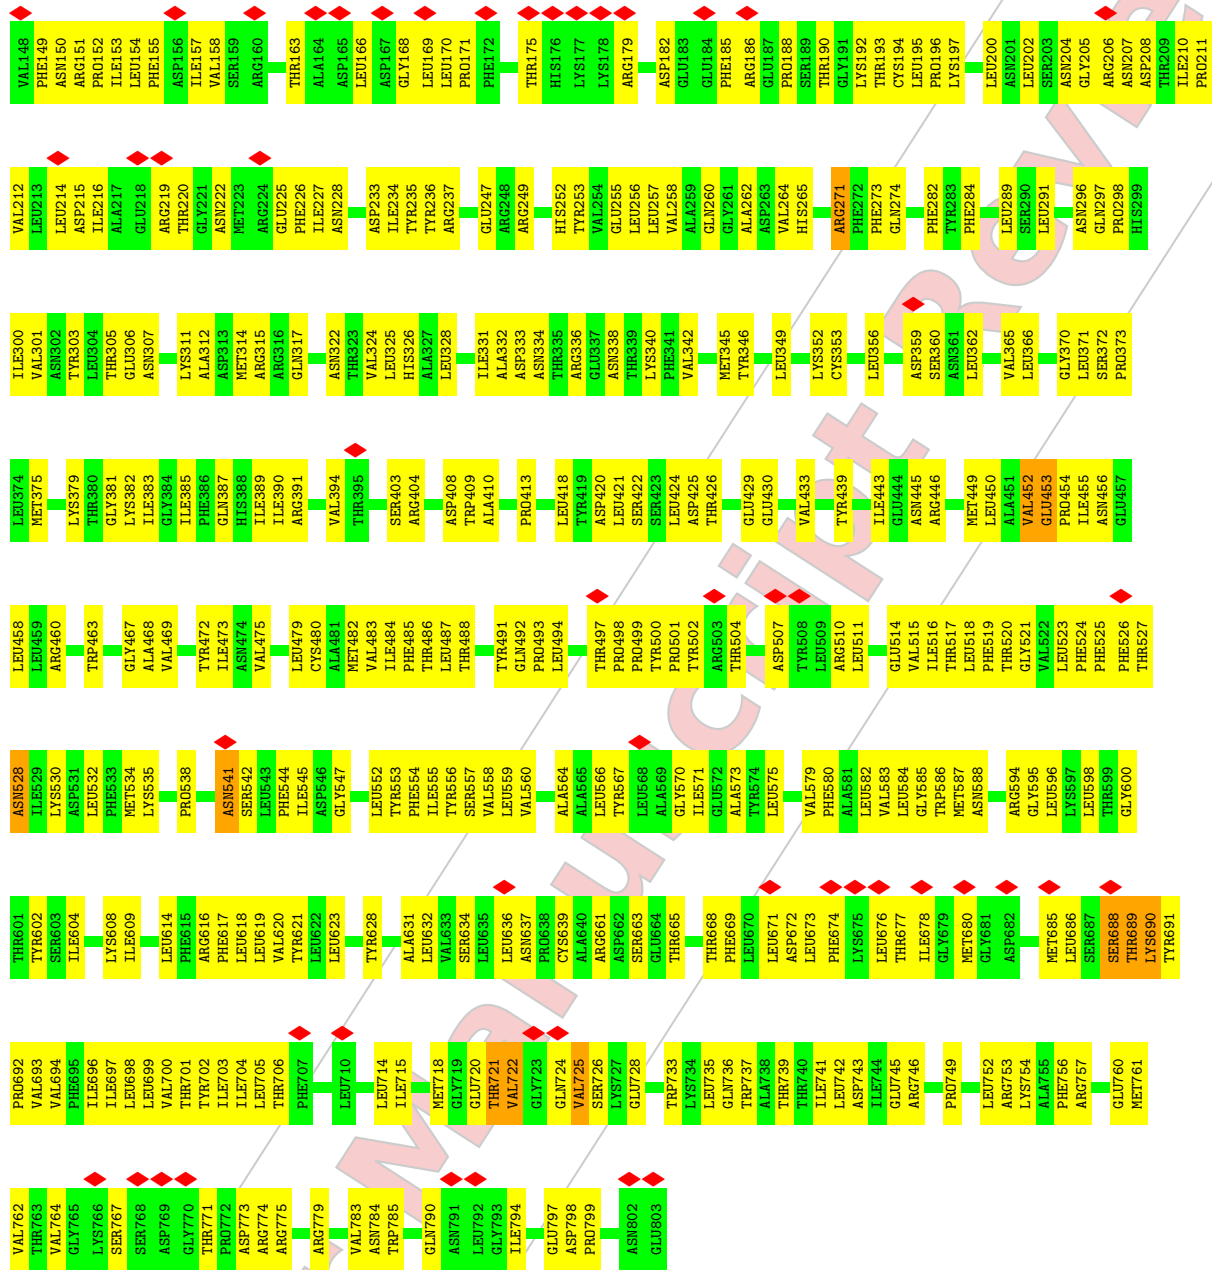

• Molecule 2:

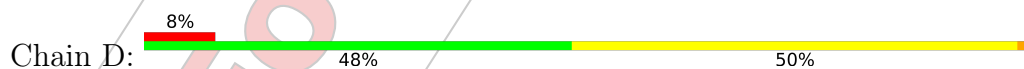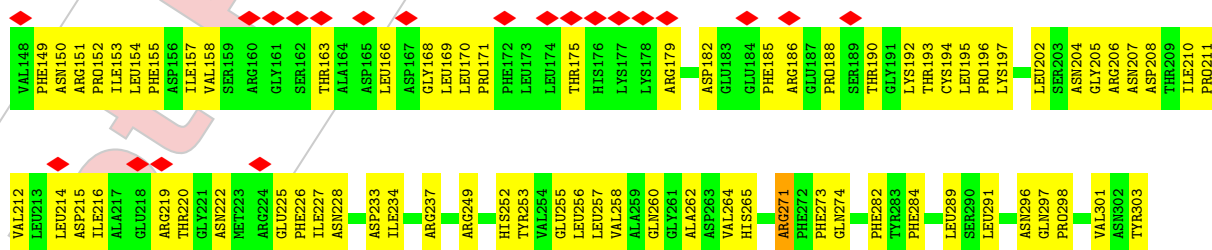

|        |        |        |        |        |        |        |        |        |        |        |        |        |        |        |        |        |        |        |        |        |        |        |        |        |        |        |        |        |        |        |        |        |        |        |        |        |        |        |        |        |        |        |        |        |        |        |        |        |        |        |        |        |        |        |        |        |        |        |        |        |        |        |        |        |        |        |        |        |        |        |
|--------|--------|--------|--------|--------|--------|--------|--------|--------|--------|--------|--------|--------|--------|--------|--------|--------|--------|--------|--------|--------|--------|--------|--------|--------|--------|--------|--------|--------|--------|--------|--------|--------|--------|--------|--------|--------|--------|--------|--------|--------|--------|--------|--------|--------|--------|--------|--------|--------|--------|--------|--------|--------|--------|--------|--------|--------|--------|--------|--------|--------|--------|--------|--------|--------|--------|--------|--------|--------|--------|--------|
| GLY770 | THR771 | PRO772 | ASP773 | ARG774 | ARG775 | ARG779 | VAL783 | ASN784 | TRP785 | GLN790 | ASN791 | LEU792 | GLY793 | ILE794 | GLU797 | ASP798 | PRO799 | ASN802 | GLU803 | LEU304 | THR305 | GLY381 | LYS382 | GLY384 | ILE385 | PHE386 | GLN387 | HIS388 | ILE389 | ILE390 | ARG391 | VAL394 | THR395 | ASP398 | SER403 | ARG404 | ASP408 | TRP409 | ALA410 | TYR411 | GLY412 | PRO413 | GLU418 | TYR419 | ASP420 | LEU421 | SER422 | SER423 | LEU424 | ASP425 | THR426 | GLU429 | GLU430 | VAL433 | TYR439 | ILE443 | GLU444 | ASN445 | ARG446 | MET449 | LEU450 | ALA451 | VAL452 | GLU453 | PRO454 | ILE455 | ASN456 | GLU457 | LEU458 | LYS379 |
| LEU696 | ILE697 | LEU698 | LEU699 | VAL700 | THR701 | TYR702 | ILE703 | ILE704 | LEU705 | THR706 | PHE707 | LEU714 | ILE715 | MET718 | GLY719 | THR721 | VAL722 | GLY723 | GLN724 | VAL725 | SER726 | LYS727 | GLU728 | TRP733 | LYS734 | LEU735 | GLN736 | TRP737 | ALA738 | THR739 | THR740 | ILE741 | LEU742 | ASP743 | ARG746 | PRO749 | LEU752 | ARG753 | LYS754 | ALA755 | PHE756 | ARG757 | GLU760 | MET761 | VAL762 | THR763 | VAL764 | SER767 | SER768 | ASP769 |        |        |        |        |        |        |        |        |        |        |        |        |        |        |        |        |        |        |        |        |
| ASN528 | ILE529 | ASP531 | LEU532 | PHE533 | MET534 | LYS535 | PRO538 | ASN541 | SER542 | LEU543 | PHE544 | ILE545 | ASP546 | GLY547 | LEU552 | TYR553 | PHE554 | ILE555 | TYR556 | SER557 | VAL558 | LEU559 | VAL560 | ALA564 | ALA565 | LEU566 | TYR567 | LEU568 | ILE571 | GLU572 | ALA573 | TYR574 | LEU575 | ALA576 | VAL579 | PHE580 | ALA581 | LEU582 | VAL583 | LEU584 | GLY585 | TRP586 | MET587 | ASN588 | ARG594 | GLY595 | LEU596 | GLY600 | ILE604 |        |        |        |        |        |        |        |        |        |        |        |        |        |        |        |        |        |        |        |        |        |
| LEU459 | ARG460 | TRP463 | GLY467 | ALA468 | VAL469 | TYR472 | ILE473 | ILE474 | ASN474 | VAL475 | TYR478 | LEU479 | CYS480 | ALA481 | MET482 | VAL483 | ILE484 | PHE485 | THR486 | LEU487 | THR488 | GLN492 | PRO493 | LEU494 | THR497 | PRO498 | PRO499 | TYR500 | PRO501 | TYR502 | ARG503 | THR504 | THR505 | VAL506 | ASP507 | TYR508 | LEU509 | ARG510 | LEU511 | GLU514 | VAL515 | ILE516 | THR517 | LEU518 | PHE519 | THR520 | GLY521 | VAL522 | LEU523 | PHE524 | PHE525 | PHE526 | THR527 |        |        |        |        |        |        |        |        |        |        |        |        |        |        |        |        |        |
| THR390 | GLY381 | LYS382 | GLY384 | ILE385 | PHE386 | GLN387 | HIS388 | ILE389 | ILE390 | ARG391 | VAL394 | THR395 | ASP398 | SER403 | ARG404 | ASP408 | TRP409 | ALA410 | TYR411 | GLY412 | PRO413 | LEU418 | TYR419 | ASP420 | LEU421 | SER422 | SER423 | LEU424 | ASP425 | THR426 | GLU429 | GLU430 | VAL433 | TYR439 | ILE443 | GLU444 | ASN445 | ARG446 | MET449 | LEU450 | ALA451 | VAL452 | GLU453 | PRO454 | ILE455 | ASN456 | GLU457 | LEU458 |        |        |        |        |        |        |        |        |        |        |        |        |        |        |        |        |        |        |        |        |        |        |
| LEU304 | THR305 | GLY381 | LYS382 | GLY384 | ILE385 | PHE386 | GLN387 | HIS388 | ILE389 | ILE390 | ARG391 | VAL394 | THR395 | ASP398 | SER403 | ARG404 | ASP408 | TRP409 | ALA410 | TYR411 | GLY412 | PRO413 | LEU418 | TYR419 | ASP420 | LEU421 | SER422 | SER423 | LEU424 | ASP425 | THR426 | GLU429 | GLU430 | VAL433 | TYR439 | ILE443 | GLU444 | ASN445 | ARG446 | MET449 | LEU450 | ALA451 | VAL452 | GLU453 | PRO454 | ILE455 | ASN456 | GLU457 | LEU458 |        |        |        |        |        |        |        |        |        |        |        |        |        |        |        |        |        |        |        |        |        |
| LYS311 | ALA312 | ASP313 | MET314 | ARG315 | ARG316 | GLN317 | ASN322 | THR323 | VAL324 | LEU325 | HIS326 | ALA327 | LEU328 | ILE331 | ALA332 | ASP333 | ASN334 | THR335 | ARG336 | GLU337 | ASN338 | THR339 | LYS340 | PHE341 | VAL342 | MET345 | TYR346 | LEU349 | LYS352 | CYS353 | LEU356 | ASP359 | SER360 | ASN361 | LEU362 | VAL365 | LEU366 | GLY370 | LEU371 | SER372 | PRO373 | LEU374 | MET375 | LYS379 |        |        |        |        |        |        |        |        |        |        |        |        |        |        |        |        |        |        |        |        |        |        |        |        |        |        |



## 4 Experimental information ⓘ

| Property                             | Value                              | Source    |
|--------------------------------------|------------------------------------|-----------|
| EM reconstruction method             | SINGLE PARTICLE                    | Depositor |
| Imposed symmetry                     | POINT, Not provided                |           |
| Number of particles used             | Not provided                       |           |
| Resolution determination method      | Not provided                       |           |
| CTF correction method                | Not provided                       |           |
| Microscope                           | Not provided                       |           |
| Voltage (kV)                         | Not provided                       |           |
| Electron dose ( $e^-/\text{\AA}^2$ ) | Not provided                       |           |
| Minimum defocus (nm)                 | Not provided                       |           |
| Maximum defocus (nm)                 | Not provided                       |           |
| Magnification                        | Not provided                       |           |
| Image detector                       | Not provided                       |           |
| Maximum map value                    | 0.877                              | Depositor |
| Minimum map value                    | -0.547                             | Depositor |
| Average map value                    | 0.002                              | Depositor |
| Map value standard deviation         | 0.025                              | Depositor |
| Recommended contour level            | 0.114                              | Depositor |
| Map size (Å)                         | 265.6, 265.6, 265.6                | wwPDB     |
| Map dimensions                       | 320, 320, 320                      | wwPDB     |
| Map angles (°)                       | 90.0, 90.0, 90.0                   | wwPDB     |
| Pixel spacing (Å)                    | 0.83000004, 0.83000004, 0.83000004 | Depositor |

## 5 Model quality [i](#)

### 5.1 Standard geometry [i](#)

Bond lengths and bond angles in the following residue types are not validated in this section: HCO, POV

The Z score for a bond length (or angle) is the number of standard deviations the observed value is removed from the expected value. A bond length (or angle) with  $|Z| > 5$  is considered an outlier worth inspection. RMSZ is the root-mean-square of all Z scores of the bond lengths (or angles).

| Mol | Chain | Bond lengths |         | Bond angles |         |
|-----|-------|--------------|---------|-------------|---------|
|     |       | RMSZ         | # Z  >5 | RMSZ        | # Z  >5 |
| 1   | A     | 0.28         | 0/5105  | 0.43        | 0/6921  |
| 1   | C     | 0.28         | 0/5105  | 0.43        | 0/6921  |
| 2   | B     | 0.29         | 0/5234  | 0.45        | 0/7095  |
| 2   | D     | 0.29         | 0/5234  | 0.45        | 0/7095  |
| All | All   | 0.29         | 0/20678 | 0.44        | 0/28032 |

Chiral center outliers are detected by calculating the chiral volume of a chiral center and verifying if the center is modelled as a planar moiety or with the opposite hand. A planarity outlier is detected by checking planarity of atoms in a peptide group, atoms in a mainchain group or atoms of a sidechain that are expected to be planar.

| Mol | Chain | #Chirality outliers | #Planarity outliers |
|-----|-------|---------------------|---------------------|
| 1   | A     | 0                   | 2                   |
| 1   | C     | 0                   | 2                   |
| 2   | B     | 0                   | 3                   |
| 2   | D     | 0                   | 3                   |
| All | All   | 0                   | 10                  |

There are no bond length outliers.

There are no bond angle outliers.

There are no chirality outliers.

All (10) planarity outliers are listed below:

| Mol | Chain | Res | Type | Group   |
|-----|-------|-----|------|---------|
| 1   | A     | 284 | PHE  | Peptide |
| 1   | A     | 453 | GLU  | Peptide |
| 2   | B     | 688 | SER  | Peptide |
| 2   | B     | 689 | THR  | Peptide |
| 2   | B     | 721 | THR  | Peptide |

*Continued on next page...*

Continued from previous page...

| Mol | Chain | Res | Type | Group   |
|-----|-------|-----|------|---------|
| 1   | C     | 284 | PHE  | Peptide |
| 1   | C     | 453 | GLU  | Peptide |
| 2   | D     | 688 | SER  | Peptide |
| 2   | D     | 689 | THR  | Peptide |
| 2   | D     | 721 | THR  | Peptide |

## 5.2 Too-close contacts [i](#)

In the following table, the Non-H and H(model) columns list the number of non-hydrogen atoms and hydrogen atoms in the chain respectively. The H(added) column lists the number of hydrogen atoms added and optimized by MolProbity. The Clashes column lists the number of clashes within the asymmetric unit, whereas Symm-Clashes lists symmetry-related clashes.

| Mol | Chain | Non-H | H(model) | H(added) | Clashes | Symm-Clashes |
|-----|-------|-------|----------|----------|---------|--------------|
| 1   | A     | 4990  | 0        | 5056     | 317     | 0            |
| 1   | C     | 4990  | 0        | 5056     | 303     | 0            |
| 2   | B     | 5116  | 0        | 5182     | 329     | 0            |
| 2   | D     | 5116  | 0        | 5182     | 323     | 0            |
| 3   | A     | 28    | 34       | 30       | 2       | 0            |
| 3   | B     | 52    | 82       | 82       | 4       | 0            |
| 3   | C     | 28    | 34       | 30       | 3       | 0            |
| 3   | D     | 52    | 82       | 82       | 4       | 0            |
| 4   | B     | 34    | 29       | 0        | 1       | 0            |
| 4   | D     | 34    | 29       | 0        | 1       | 0            |
| All | All   | 20440 | 290      | 20700    | 1200    | 0            |

The all-atom clashscore is defined as the number of clashes found per 1000 atoms (including hydrogen atoms). The all-atom clashscore for this structure is 29.

All (1200) close contacts within the same asymmetric unit are listed below, sorted by their clash magnitude.

| Atom-1          | Atom-2           | Interatomic distance (Å) | Clash overlap (Å) |
|-----------------|------------------|--------------------------|-------------------|
| 2:B:202:LEU:HG  | 2:B:205:GLY:HA2  | 1.48                     | 0.96              |
| 1:C:661:ARG:HG2 | 1:C:687:SER:HB2  | 1.49                     | 0.94              |
| 2:D:202:LEU:HG  | 2:D:205:GLY:HA2  | 1.48                     | 0.94              |
| 1:A:661:ARG:HG2 | 1:A:687:SER:HB2  | 1.49                     | 0.92              |
| 2:D:524:PHE:HA  | 3:D:902:POV:H13B | 1.54                     | 0.89              |
| 2:B:408:ASP:HB2 | 2:B:418:LEU:HD13 | 1.55                     | 0.89              |
| 2:D:408:ASP:HB2 | 2:D:418:LEU:HD13 | 1.55                     | 0.86              |
| 1:A:800:GLY:HA3 | 2:B:235:TYR:HE2  | 1.40                     | 0.86              |

Continued on next page...

*Continued from previous page...*

| Atom-1           | Atom-2           | Interatomic distance (Å) | Clash overlap (Å) |
|------------------|------------------|--------------------------|-------------------|
| 1:A:766:LYS:HD2  | 1:A:770:GLY:HA2  | 1.57                     | 0.86              |
| 1:C:766:LYS:HD2  | 1:C:770:GLY:HA2  | 1.57                     | 0.85              |
| 2:B:443:ILE:HD11 | 2:B:541:ASN:HB3  | 1.58                     | 0.84              |
| 2:D:443:ILE:HD11 | 2:D:541:ASN:HB3  | 1.58                     | 0.84              |
| 1:A:719:GLY:HA2  | 2:D:722:VAL:HG13 | 1.61                     | 0.82              |
| 2:B:494:LEU:HD21 | 2:B:575:LEU:HD22 | 1.60                     | 0.82              |
| 2:D:494:LEU:HD21 | 2:D:575:LEU:HD22 | 1.60                     | 0.82              |
| 1:C:583:VAL:HG21 | 2:D:698:LEU:HD11 | 1.63                     | 0.79              |
| 2:B:676:LEU:HD11 | 2:B:699:LEU:HD21 | 1.66                     | 0.78              |
| 1:A:628:TYR:HE1  | 2:D:583:VAL:HB   | 1.46                     | 0.78              |
| 2:D:390:ILE:HD11 | 2:D:424:LEU:HD21 | 1.65                     | 0.77              |
| 1:A:800:GLY:N    | 2:B:236:TYR:OH   | 2.17                     | 0.77              |
| 2:B:524:PHE:HA   | 3:B:902:POV:H13B | 1.67                     | 0.77              |
| 2:B:390:ILE:HD11 | 2:B:424:LEU:HD21 | 1.65                     | 0.77              |
| 2:D:249:ARG:HG2  | 2:D:297:GLN:HE21 | 1.51                     | 0.76              |
| 1:A:192:LYS:HD3  | 1:A:197:LYS:HE3  | 1.68                     | 0.76              |
| 2:B:249:ARG:HG2  | 2:B:297:GLN:HE21 | 1.51                     | 0.76              |
| 1:C:440:ASN:O    | 1:C:446:ARG:NH2  | 2.19                     | 0.76              |
| 1:C:685:MET:HA   | 1:C:689:THR:HG21 | 1.67                     | 0.76              |
| 1:C:722:VAL:HG12 | 2:D:715:ILE:HG23 | 1.67                     | 0.76              |
| 2:D:190:THR:HG23 | 2:D:192:LYS:H    | 1.51                     | 0.76              |
| 2:D:676:LEU:HD11 | 2:D:699:LEU:HD21 | 1.66                     | 0.76              |
| 1:A:440:ASN:O    | 1:A:446:ARG:NH2  | 2.19                     | 0.75              |
| 1:A:685:MET:HA   | 1:A:689:THR:HG21 | 1.67                     | 0.75              |
| 1:C:192:LYS:HD3  | 1:C:197:LYS:HE3  | 1.68                     | 0.75              |
| 2:B:190:THR:HG23 | 2:B:192:LYS:H    | 1.51                     | 0.75              |
| 2:D:527:THR:HG22 | 2:D:530:LYS:HD2  | 1.68                     | 0.75              |
| 2:D:472:TYR:HA   | 2:D:475:VAL:HG12 | 1.68                     | 0.75              |
| 2:D:552:LEU:HB3  | 2:D:588:ASN:HD21 | 1.51                     | 0.75              |
| 2:D:661:ARG:HG3  | 2:D:665:THR:HG21 | 1.69                     | 0.74              |
| 1:A:637:ASN:HB3  | 2:D:494:LEU:HD12 | 1.69                     | 0.74              |
| 2:B:206:ARG:O    | 2:B:253:TYR:OH   | 2.04                     | 0.74              |
| 2:B:552:LEU:HB3  | 2:B:588:ASN:HD21 | 1.51                     | 0.74              |
| 2:D:206:ARG:O    | 2:D:253:TYR:OH   | 2.04                     | 0.74              |
| 2:B:527:THR:HG22 | 2:B:530:LYS:HD2  | 1.68                     | 0.74              |
| 2:B:661:ARG:HG3  | 2:B:665:THR:HG21 | 1.69                     | 0.74              |
| 2:D:463:TRP:HA   | 2:D:467:GLY:HA3  | 1.70                     | 0.74              |
| 2:B:472:TYR:HA   | 2:B:475:VAL:HG12 | 1.68                     | 0.73              |
| 2:B:544:PHE:O    | 2:B:736:GLN:NE2  | 2.20                     | 0.73              |
| 1:A:800:GLY:HA3  | 2:B:235:TYR:CE2  | 2.23                     | 0.73              |
| 1:A:630:SER:OG   | 2:D:486:THR:HG23 | 1.89                     | 0.72              |

*Continued on next page...*

*Continued from previous page...*

| Atom-1           | Atom-2           | Interatomic distance (Å) | Clash overlap (Å) |
|------------------|------------------|--------------------------|-------------------|
| 2:D:544:PHE:O    | 2:D:736:GLN:NE2  | 2.20                     | 0.72              |
| 1:C:665:THR:OG1  | 1:C:668:THR:OG1  | 2.08                     | 0.71              |
| 2:B:761:MET:HE2  | 2:B:774:ARG:HE   | 1.55                     | 0.71              |
| 1:A:582:LEU:HD23 | 2:B:631:ALA:HB2  | 1.71                     | 0.71              |
| 1:A:665:THR:OG1  | 1:A:668:THR:OG1  | 2.08                     | 0.71              |
| 2:B:463:TRP:HA   | 2:B:467:GLY:HA3  | 1.70                     | 0.71              |
| 1:C:256:LEU:O    | 1:C:260:GLN:NE2  | 2.23                     | 0.71              |
| 1:A:412:GLY:N    | 2:B:247:GLU:OE2  | 2.24                     | 0.70              |
| 1:A:256:LEU:O    | 1:A:260:GLN:NE2  | 2.23                     | 0.70              |
| 1:C:193:THR:HG22 | 1:C:194:CYS:H    | 1.57                     | 0.70              |
| 1:A:193:THR:HG22 | 1:A:194:CYS:H    | 1.57                     | 0.69              |
| 2:D:761:MET:HE2  | 2:D:774:ARG:HE   | 1.55                     | 0.69              |
| 2:D:154:LEU:HA   | 2:D:157:ILE:HD12 | 1.74                     | 0.69              |
| 1:A:418:LEU:HD21 | 1:A:762:VAL:HG11 | 1.74                     | 0.69              |
| 2:D:628:TYR:OH   | 2:D:698:LEU:O    | 2.11                     | 0.69              |
| 2:D:493:PRO:HB2  | 2:D:499:PRO:HB3  | 1.75                     | 0.69              |
| 1:A:278:GLU:OE1  | 1:A:320:ARG:NH2  | 2.27                     | 0.68              |
| 2:B:628:TYR:OH   | 2:B:698:LEU:O    | 2.11                     | 0.68              |
| 2:D:394:VAL:N    | 2:D:403:SER:OG   | 2.27                     | 0.68              |
| 1:A:408:ASP:OD2  | 1:A:779:ARG:NH1  | 2.26                     | 0.68              |
| 1:C:151:ARG:HB3  | 1:C:152:PRO:HD3  | 1.76                     | 0.68              |
| 1:C:278:GLU:OE1  | 1:C:320:ARG:NH2  | 2.27                     | 0.68              |
| 1:C:408:ASP:OD2  | 1:C:779:ARG:NH1  | 2.26                     | 0.68              |
| 2:B:686:LEU:HD13 | 2:B:688:SER:H    | 1.59                     | 0.67              |
| 1:C:418:LEU:HD21 | 1:C:762:VAL:HG11 | 1.74                     | 0.67              |
| 1:C:453:GLU:O    | 1:C:455:ILE:N    | 2.28                     | 0.67              |
| 2:B:394:VAL:N    | 2:B:403:SER:OG   | 2.27                     | 0.67              |
| 1:A:603:SER:O    | 1:A:606:ILE:HG22 | 1.95                     | 0.67              |
| 1:A:453:GLU:O    | 1:A:455:ILE:N    | 2.28                     | 0.67              |
| 2:B:154:LEU:HA   | 2:B:157:ILE:HD12 | 1.74                     | 0.67              |
| 1:C:550:GLN:HA   | 1:C:553:TYR:HD2  | 1.60                     | 0.67              |
| 2:D:686:LEU:HD13 | 2:D:688:SER:H    | 1.59                     | 0.67              |
| 1:A:151:ARG:HB3  | 1:A:152:PRO:HD3  | 1.75                     | 0.67              |
| 2:B:493:PRO:HB2  | 2:B:499:PRO:HB3  | 1.75                     | 0.67              |
| 1:A:584:LEU:HA   | 1:A:587:MET:HE3  | 1.76                     | 0.66              |
| 1:A:785:TRP:CZ3  | 2:B:333:ASP:HB2  | 2.30                     | 0.66              |
| 2:B:665:THR:HB   | 2:B:668:THR:OG1  | 1.95                     | 0.66              |
| 2:D:151:ARG:HB3  | 2:D:152:PRO:HD3  | 1.77                     | 0.66              |
| 1:A:719:GLY:CA   | 2:D:722:VAL:HG13 | 2.24                     | 0.66              |
| 1:C:665:THR:HG1  | 1:C:668:THR:HG1  | 1.43                     | 0.66              |
| 1:A:550:GLN:HA   | 1:A:553:TYR:HD2  | 1.60                     | 0.66              |

*Continued on next page...*

*Continued from previous page...*

| Atom-1           | Atom-2           | Interatomic distance (Å) | Clash overlap (Å) |
|------------------|------------------|--------------------------|-------------------|
| 2:D:170:LEU:HB3  | 2:D:171:PRO:HD3  | 1.78                     | 0.66              |
| 2:B:151:ARG:HB3  | 2:B:152:PRO:HD3  | 1.77                     | 0.66              |
| 2:B:721:THR:HB   | 1:C:715:ILE:HG23 | 1.78                     | 0.66              |
| 2:D:665:THR:HB   | 2:D:668:THR:OG1  | 1.95                     | 0.66              |
| 1:C:583:VAL:HG11 | 2:D:698:LEU:HD12 | 1.77                     | 0.66              |
| 1:A:179:ARG:N    | 1:A:182:ASP:OD2  | 2.28                     | 0.65              |
| 2:B:170:LEU:HB3  | 2:B:171:PRO:HD3  | 1.77                     | 0.65              |
| 1:C:603:SER:O    | 1:C:606:ILE:HG22 | 1.95                     | 0.65              |
| 2:B:767:SER:OG   | 2:B:771:THR:OG1  | 2.12                     | 0.65              |
| 1:C:179:ARG:N    | 1:C:182:ASP:OD2  | 2.28                     | 0.65              |
| 2:B:264:VAL:CG1  | 2:B:312:ALA:HB2  | 2.27                     | 0.65              |
| 1:A:414:VAL:HG11 | 2:B:282:PHE:HB2  | 1.79                     | 0.65              |
| 1:A:425:ASP:HB2  | 1:A:458:LEU:HD21 | 1.79                     | 0.65              |
| 2:B:179:ARG:HG3  | 2:B:220:THR:HB   | 1.78                     | 0.65              |
| 2:D:264:VAL:CG1  | 2:D:312:ALA:HB2  | 2.27                     | 0.65              |
| 1:A:170:LEU:HB3  | 1:A:171:PRO:HD3  | 1.78                     | 0.64              |
| 2:D:208:ASP:O    | 2:D:211:PRO:HD2  | 1.98                     | 0.64              |
| 1:A:482:MET:HE1  | 1:A:585:GLY:HA3  | 1.78                     | 0.64              |
| 2:D:720:GLU:HA   | 2:D:724:GLN:OE1  | 1.98                     | 0.64              |
| 2:B:208:ASP:O    | 2:B:211:PRO:HD2  | 1.98                     | 0.64              |
| 2:B:720:GLU:HA   | 2:B:724:GLN:OE1  | 1.98                     | 0.64              |
| 1:C:170:LEU:HB3  | 1:C:171:PRO:HD3  | 1.79                     | 0.64              |
| 2:D:525:PHE:HB2  | 2:D:557:SER:OG   | 1.97                     | 0.64              |
| 1:C:296:ASN:HA   | 1:C:345:MET:HE1  | 1.78                     | 0.64              |
| 1:C:425:ASP:HB2  | 1:C:458:LEU:HD21 | 1.79                     | 0.64              |
| 1:C:498:PRO:HG2  | 1:C:570:GLY:HA2  | 1.80                     | 0.64              |
| 1:A:498:PRO:HG2  | 1:A:570:GLY:HA2  | 1.80                     | 0.64              |
| 2:B:193:THR:HG22 | 2:B:194:CYS:H    | 1.63                     | 0.64              |
| 2:B:525:PHE:HB2  | 2:B:557:SER:OG   | 1.97                     | 0.64              |
| 2:B:661:ARG:CG   | 2:B:665:THR:HG21 | 2.28                     | 0.64              |
| 2:D:289:LEU:HD21 | 2:D:314:MET:HG2  | 1.80                     | 0.64              |
| 2:B:210:ILE:HB   | 2:B:211:PRO:HD3  | 1.81                     | 0.63              |
| 2:D:678:ILE:HG13 | 2:D:680:MET:HG3  | 1.80                     | 0.63              |
| 2:B:678:ILE:HG13 | 2:B:680:MET:HG3  | 1.80                     | 0.63              |
| 2:B:420:ASP:OD2  | 2:B:775:ARG:NH1  | 2.31                     | 0.63              |
| 2:B:760:GLU:HG3  | 2:B:762:VAL:HG23 | 1.80                     | 0.63              |
| 2:D:179:ARG:HG3  | 2:D:220:THR:HB   | 1.78                     | 0.63              |
| 2:D:420:ASP:OD2  | 2:D:775:ARG:NH1  | 2.31                     | 0.63              |
| 2:D:760:GLU:HG3  | 2:D:762:VAL:HG23 | 1.80                     | 0.63              |
| 2:B:289:LEU:HD21 | 2:B:314:MET:HG2  | 1.80                     | 0.63              |
| 2:D:661:ARG:CG   | 2:D:665:THR:HG21 | 2.28                     | 0.63              |

*Continued on next page...*



*Continued from previous page...*

| Atom-1           | Atom-2           | Interatomic distance (Å) | Clash overlap (Å) |
|------------------|------------------|--------------------------|-------------------|
| 2:B:256:LEU:O    | 2:B:260:GLN:NE2  | 2.32                     | 0.63              |
| 2:B:689:THR:HG23 | 2:B:692:PRO:HA   | 1.80                     | 0.63              |
| 1:A:507:ASP:OD1  | 1:A:510:ARG:NH1  | 2.30                     | 0.63              |
| 1:A:556:TYR:HB2  | 1:A:584:LEU:HD12 | 1.81                     | 0.63              |
| 2:D:256:LEU:O    | 2:D:260:GLN:NE2  | 2.32                     | 0.63              |
| 2:D:693:VAL:HA   | 2:D:696:ILE:HG22 | 1.81                     | 0.63              |
| 2:B:677:THR:HA   | 2:B:703:ILE:HD12 | 1.79                     | 0.62              |
| 2:B:693:VAL:HA   | 2:B:696:ILE:HG22 | 1.81                     | 0.62              |
| 1:C:507:ASP:OD1  | 1:C:510:ARG:NH1  | 2.30                     | 0.62              |
| 2:D:677:THR:HA   | 2:D:703:ILE:HD12 | 1.79                     | 0.62              |
| 1:A:296:ASN:HA   | 1:A:345:MET:HE1  | 1.82                     | 0.62              |
| 2:B:408:ASP:HB2  | 2:B:418:LEU:CD1  | 2.29                     | 0.62              |
| 1:C:556:TYR:HB2  | 1:C:584:LEU:HD12 | 1.81                     | 0.62              |
| 2:D:193:THR:HG22 | 2:D:194:CYS:H    | 1.63                     | 0.62              |
| 2:D:689:THR:HG23 | 2:D:692:PRO:HA   | 1.81                     | 0.62              |
| 1:A:760:GLU:OE2  | 1:A:779:ARG:NE   | 2.32                     | 0.62              |
| 2:B:443:ILE:HD11 | 2:B:541:ASN:CB   | 2.30                     | 0.62              |
| 2:B:452:VAL:HG23 | 2:B:453:GLU:H    | 1.64                     | 0.62              |
| 2:B:790:GLN:O    | 2:B:794:ILE:HD11 | 1.99                     | 0.62              |
| 1:C:474:ASN:HB3  | 3:C:902:POV:P    | 2.40                     | 0.62              |
| 1:C:760:GLU:OE2  | 1:C:779:ARG:NE   | 2.32                     | 0.62              |
| 2:D:790:GLN:O    | 2:D:794:ILE:HD11 | 1.99                     | 0.62              |
| 2:D:210:ILE:HB   | 2:D:211:PRO:HD3  | 1.81                     | 0.62              |
| 1:A:696:ILE:O    | 1:A:700:VAL:HG23 | 2.00                     | 0.61              |
| 1:A:801:LYS:N    | 2:B:235:TYR:OH   | 2.24                     | 0.61              |
| 2:B:521:GLY:O    | 2:B:557:SER:OG   | 2.09                     | 0.61              |
| 2:D:452:VAL:HG23 | 2:D:453:GLU:H    | 1.64                     | 0.61              |
| 2:D:305:THR:OG1  | 2:D:306:GLU:OE1  | 2.17                     | 0.61              |
| 2:B:725:VAL:O    | 2:B:728:GLU:N    | 2.34                     | 0.61              |
| 1:C:600:GLY:HA3  | 1:C:602:TYR:CE2  | 2.35                     | 0.61              |
| 1:C:696:ILE:O    | 1:C:700:VAL:HG23 | 2.00                     | 0.61              |
| 1:A:302:ASN:O    | 1:A:306:GLU:HG2  | 2.01                     | 0.61              |
| 1:C:302:ASN:O    | 1:C:306:GLU:HG2  | 2.01                     | 0.61              |
| 1:C:717:LEU:O    | 1:C:722:VAL:HG22 | 2.01                     | 0.61              |
| 2:D:504:THR:HG23 | 2:D:507:ASP:H    | 1.65                     | 0.61              |
| 1:A:383:ILE:HD11 | 1:A:445:ASN:CB   | 2.31                     | 0.61              |
| 1:A:600:GLY:HA3  | 1:A:602:TYR:CE2  | 2.36                     | 0.61              |
| 1:A:717:LEU:O    | 1:A:722:VAL:HG22 | 2.01                     | 0.61              |
| 2:B:504:THR:HG23 | 2:B:507:ASP:H    | 1.65                     | 0.61              |
| 1:A:631:ALA:HB1  | 2:D:579:VAL:HG13 | 1.83                     | 0.60              |
| 1:C:383:ILE:HD11 | 1:C:445:ASN:CB   | 2.31                     | 0.60              |

*Continued on next page...*

*Continued from previous page...*

| Atom-1           | Atom-2           | Interatomic distance (Å) | Clash overlap (Å) |
|------------------|------------------|--------------------------|-------------------|
| 1:C:454:PRO:O    | 1:C:458:LEU:N    | 2.19                     | 0.60              |
| 1:A:154:LEU:HD11 | 1:A:194:CYS:SG   | 2.42                     | 0.60              |
| 2:B:298:PRO:HG3  | 2:B:345:MET:HE2  | 1.81                     | 0.60              |
| 2:D:524:PHE:HA   | 3:D:902:POV:C13  | 2.30                     | 0.60              |
| 2:D:725:VAL:O    | 2:D:728:GLU:N    | 2.34                     | 0.60              |
| 1:A:763:THR:OG1  | 1:A:774:ARG:NH1  | 2.29                     | 0.60              |
| 1:A:634:SER:O    | 2:D:494:LEU:HD11 | 2.01                     | 0.60              |
| 2:B:583:VAL:HG11 | 1:C:698:LEU:HD11 | 1.82                     | 0.60              |
| 1:C:421:LEU:HD21 | 1:C:778:PHE:HB2  | 1.83                     | 0.60              |
| 2:B:617:PHE:HD2  | 2:B:618:LEU:HD22 | 1.66                     | 0.60              |
| 1:A:408:ASP:OD1  | 1:A:796:ASN:ND2  | 2.35                     | 0.60              |
| 1:C:482:MET:HE1  | 1:C:585:GLY:HA3  | 1.82                     | 0.60              |
| 1:C:584:LEU:HA   | 1:C:587:MET:HE3  | 1.84                     | 0.60              |
| 2:D:767:SER:OG   | 2:D:771:THR:OG1  | 2.12                     | 0.60              |
| 2:B:632:LEU:HD21 | 2:B:698:LEU:HB3  | 1.84                     | 0.60              |
| 1:C:685:MET:O    | 1:C:689:THR:OG1  | 2.08                     | 0.60              |
| 2:D:222:ASN:O    | 2:D:225:GLU:N    | 2.31                     | 0.60              |
| 2:D:469:VAL:O    | 2:D:473:ILE:HG12 | 2.02                     | 0.60              |
| 1:A:222:ASN:O    | 1:A:226:PHE:N    | 2.35                     | 0.60              |
| 1:A:421:LEU:HD21 | 1:A:778:PHE:HB2  | 1.83                     | 0.60              |
| 1:A:579:VAL:HG13 | 2:B:631:ALA:HB1  | 1.84                     | 0.60              |
| 1:A:715:ILE:HG23 | 2:D:721:THR:HB   | 1.84                     | 0.60              |
| 1:C:154:LEU:HD11 | 1:C:194:CYS:SG   | 2.42                     | 0.60              |
| 2:B:215:ASP:O    | 2:B:219:ARG:HG2  | 2.02                     | 0.59              |
| 1:A:181:THR:HG22 | 1:A:222:ASN:HD22 | 1.67                     | 0.59              |
| 1:C:258:VAL:HG11 | 1:C:303:TYR:HE2  | 1.66                     | 0.59              |
| 2:D:500:TYR:HB2  | 2:D:501:PRO:HD3  | 1.84                     | 0.59              |
| 2:B:222:ASN:HB3  | 2:B:225:GLU:HB3  | 1.84                     | 0.59              |
| 1:C:274:GLN:OE1  | 1:C:320:ARG:NH2  | 2.35                     | 0.59              |
| 2:D:410:ALA:HB1  | 2:D:790:GLN:HG2  | 1.84                     | 0.59              |
| 2:D:521:GLY:O    | 2:D:557:SER:OG   | 2.09                     | 0.59              |
| 2:D:617:PHE:HD2  | 2:D:618:LEU:HD22 | 1.66                     | 0.59              |
| 2:D:298:PRO:HG3  | 2:D:345:MET:HE2  | 1.84                     | 0.59              |
| 2:D:632:LEU:HD21 | 2:D:698:LEU:HB3  | 1.84                     | 0.59              |
| 1:A:258:VAL:HG11 | 1:A:303:TYR:HE2  | 1.66                     | 0.59              |
| 2:B:469:VAL:O    | 2:B:473:ILE:HG12 | 2.02                     | 0.59              |
| 1:C:181:THR:HG22 | 1:C:222:ASN:HD22 | 1.67                     | 0.59              |
| 2:B:410:ALA:HB1  | 2:B:790:GLN:HG2  | 1.83                     | 0.59              |
| 2:D:542:SER:O    | 2:D:547:GLY:HA3  | 2.03                     | 0.59              |
| 1:A:502:TYR:HE2  | 1:A:511:LEU:HD12 | 1.67                     | 0.59              |
| 1:A:274:GLN:OE1  | 1:A:320:ARG:NH2  | 2.35                     | 0.59              |

*Continued on next page...*



*Continued from previous page...*

| Atom-1           | Atom-2           | Interatomic distance (Å) | Clash overlap (Å) |
|------------------|------------------|--------------------------|-------------------|
| 1:C:408:ASP:OD1  | 1:C:796:ASN:ND2  | 2.35                     | 0.59              |
| 1:C:502:TYR:HE2  | 1:C:511:LEU:HD12 | 1.67                     | 0.59              |
| 1:C:763:THR:OG1  | 1:C:774:ARG:NH1  | 2.29                     | 0.59              |
| 2:D:584:LEU:HD23 | 2:D:587:MET:HE3  | 1.86                     | 0.58              |
| 1:C:474:ASN:HB3  | 3:C:902:POV:O13  | 2.03                     | 0.58              |
| 2:B:542:SER:O    | 2:B:547:GLY:HA3  | 2.03                     | 0.58              |
| 2:D:494:LEU:CD2  | 2:D:575:LEU:HD22 | 2.32                     | 0.58              |
| 2:D:215:ASP:O    | 2:D:219:ARG:HG2  | 2.03                     | 0.58              |
| 2:D:222:ASN:HB3  | 2:D:225:GLU:HB3  | 1.84                     | 0.58              |
| 2:D:676:LEU:HD13 | 2:D:699:LEU:HD11 | 1.86                     | 0.58              |
| 2:B:669:PHE:HA   | 2:B:672:ASP:HB2  | 1.86                     | 0.58              |
| 2:D:443:ILE:HD11 | 2:D:541:ASN:CB   | 2.30                     | 0.58              |
| 2:B:482:MET:CE   | 2:B:585:GLY:HA3  | 2.34                     | 0.58              |
| 2:B:673:LEU:O    | 2:B:677:THR:HG23 | 2.03                     | 0.58              |
| 1:C:524:PHE:HB2  | 1:C:557:SER:HB3  | 1.86                     | 0.58              |
| 2:D:482:MET:CE   | 2:D:585:GLY:HA3  | 2.34                     | 0.58              |
| 1:A:389:ILE:O    | 1:A:404:ARG:HD3  | 2.03                     | 0.58              |
| 2:B:500:TYR:HB2  | 2:B:501:PRO:HD3  | 1.84                     | 0.58              |
| 1:C:389:ILE:O    | 1:C:404:ARG:HD3  | 2.04                     | 0.58              |
| 2:D:526:PHE:HB3  | 2:D:530:LYS:NZ   | 2.18                     | 0.58              |
| 1:A:617:PHE:HB2  | 1:A:713:MET:SD   | 2.44                     | 0.58              |
| 2:B:257:LEU:O    | 2:B:262:ALA:HB2  | 2.04                     | 0.58              |
| 1:C:222:ASN:O    | 1:C:226:PHE:N    | 2.35                     | 0.58              |
| 1:A:524:PHE:HB2  | 1:A:557:SER:HB3  | 1.86                     | 0.58              |
| 1:A:636:LEU:HB3  | 1:A:689:THR:HG22 | 1.86                     | 0.58              |
| 2:B:186:ARG:HG3  | 2:B:192:LYS:O    | 2.05                     | 0.57              |
| 2:B:475:VAL:O    | 2:B:479:LEU:HD23 | 2.04                     | 0.57              |
| 2:D:257:LEU:O    | 2:D:262:ALA:HB2  | 2.04                     | 0.57              |
| 2:D:725:VAL:HG13 | 2:D:728:GLU:HB3  | 1.86                     | 0.57              |
| 1:A:501:PRO:HB3  | 1:A:503:ARG:NH1  | 2.19                     | 0.57              |
| 2:B:494:LEU:CD2  | 2:B:575:LEU:HD22 | 2.32                     | 0.57              |
| 1:C:471:PHE:CE2  | 1:C:595:GLY:HA3  | 2.40                     | 0.57              |
| 2:D:408:ASP:HB2  | 2:D:418:LEU:CD1  | 2.29                     | 0.57              |
| 1:A:474:ASN:HB3  | 3:A:902:POV:P    | 2.45                     | 0.57              |
| 2:B:305:THR:OG1  | 2:B:306:GLU:OE1  | 2.17                     | 0.57              |
| 2:D:331:ILE:O    | 2:D:331:ILE:HD12 | 2.05                     | 0.57              |
| 2:D:673:LEU:O    | 2:D:677:THR:HG23 | 2.03                     | 0.57              |
| 2:B:222:ASN:O    | 2:B:225:GLU:N    | 2.31                     | 0.57              |
| 1:C:501:PRO:HB3  | 1:C:503:ARG:NH1  | 2.19                     | 0.57              |
| 1:C:617:PHE:HB2  | 1:C:713:MET:SD   | 2.44                     | 0.57              |
| 1:A:207:ASN:HB3  | 1:A:210:ILE:CD1  | 2.35                     | 0.57              |

*Continued on next page...*

*Continued from previous page...*

| Atom-1           | Atom-2           | Interatomic distance (Å) | Clash overlap (Å) |
|------------------|------------------|--------------------------|-------------------|
| 1:A:471:PHE:CE2  | 1:A:595:GLY:HA3  | 2.40                     | 0.57              |
| 2:B:331:ILE:HD12 | 2:B:331:ILE:O    | 2.04                     | 0.57              |
| 2:B:389:ILE:O    | 2:B:404:ARG:HD3  | 2.04                     | 0.57              |
| 1:C:530:LYS:HA   | 1:C:533:PHE:HB3  | 1.86                     | 0.57              |
| 1:A:628:TYR:CE1  | 2:D:583:VAL:HB   | 2.36                     | 0.57              |
| 2:D:475:VAL:O    | 2:D:479:LEU:HD23 | 2.04                     | 0.57              |
| 1:A:530:LYS:HA   | 1:A:533:PHE:HB3  | 1.86                     | 0.57              |
| 2:B:179:ARG:N    | 2:B:182:ASP:OD2  | 2.29                     | 0.57              |
| 1:C:582:LEU:HD23 | 2:D:631:ALA:HB2  | 1.86                     | 0.57              |
| 1:C:760:GLU:HG3  | 1:C:762:VAL:HG23 | 1.87                     | 0.57              |
| 2:D:418:LEU:HD21 | 2:D:762:VAL:HG21 | 1.87                     | 0.57              |
| 1:A:582:LEU:HD23 | 2:B:631:ALA:CB   | 2.34                     | 0.56              |
| 1:A:760:GLU:HG3  | 1:A:762:VAL:HG23 | 1.87                     | 0.56              |
| 2:B:676:LEU:HD13 | 2:B:699:LEU:HD11 | 1.86                     | 0.56              |
| 2:B:725:VAL:HG13 | 2:B:728:GLU:HB3  | 1.86                     | 0.56              |
| 2:D:484:ILE:O    | 2:D:488:THR:HG23 | 2.05                     | 0.56              |
| 2:D:676:LEU:CD1  | 2:D:699:LEU:HD21 | 2.35                     | 0.56              |
| 2:B:609:ILE:O    | 2:B:614:LEU:HD23 | 2.05                     | 0.56              |
| 2:D:342:VAL:HG12 | 2:D:385:ILE:HD12 | 1.87                     | 0.56              |
| 1:A:489:ALA:O    | 2:B:634:SER:OG   | 2.19                     | 0.56              |
| 1:A:785:TRP:CH2  | 2:B:333:ASP:HB2  | 2.40                     | 0.56              |
| 2:B:366:LEU:HD22 | 2:B:370:GLY:O    | 2.05                     | 0.56              |
| 2:B:526:PHE:HB3  | 2:B:530:LYS:NZ   | 2.18                     | 0.56              |
| 1:C:636:LEU:HB3  | 1:C:689:THR:HG22 | 1.86                     | 0.56              |
| 2:D:186:ARG:HG3  | 2:D:192:LYS:O    | 2.04                     | 0.56              |
| 2:D:366:LEU:HD22 | 2:D:370:GLY:O    | 2.05                     | 0.56              |
| 2:D:609:ILE:O    | 2:D:614:LEU:HD23 | 2.05                     | 0.56              |
| 1:A:463:TRP:HA   | 1:A:467:GLY:HA3  | 1.88                     | 0.56              |
| 1:A:631:ALA:HB1  | 2:D:579:VAL:CG1  | 2.35                     | 0.56              |
| 2:B:166:LEU:HD11 | 2:B:212:VAL:HG11 | 1.86                     | 0.56              |
| 2:B:524:PHE:HA   | 3:B:902:POV:C13  | 2.35                     | 0.56              |
| 2:B:628:TYR:CE2  | 2:B:702:TYR:HB2  | 2.41                     | 0.56              |
| 1:C:721:THR:O    | 1:C:725:VAL:HG22 | 2.05                     | 0.56              |
| 2:D:600:GLY:O    | 2:D:604:ILE:HG12 | 2.06                     | 0.56              |
| 2:D:669:PHE:HA   | 2:D:672:ASP:HB2  | 1.86                     | 0.56              |
| 1:A:517:THR:HG22 | 1:A:560:VAL:HG11 | 1.88                     | 0.56              |
| 1:C:207:ASN:HB3  | 1:C:210:ILE:CD1  | 2.35                     | 0.56              |
| 1:C:418:LEU:HG   | 1:C:777:CYS:HB3  | 1.88                     | 0.56              |
| 1:A:418:LEU:HG   | 1:A:777:CYS:HB3  | 1.88                     | 0.56              |
| 1:A:601:THR:CG2  | 1:A:605:MET:HB2  | 2.36                     | 0.56              |
| 2:B:600:GLY:O    | 2:B:604:ILE:HG12 | 2.06                     | 0.56              |

*Continued on next page...*

*Continued from previous page...*

| Atom-1           | Atom-2           | Interatomic distance (Å) | Clash overlap (Å) |
|------------------|------------------|--------------------------|-------------------|
| 1:C:517:THR:HG22 | 1:C:560:VAL:HG11 | 1.88                     | 0.56              |
| 2:D:389:ILE:O    | 2:D:404:ARG:HD3  | 2.04                     | 0.56              |
| 1:A:383:ILE:HD11 | 1:A:445:ASN:HB3  | 1.87                     | 0.56              |
| 2:B:325:LEU:HD22 | 2:B:346:TYR:CD1  | 2.41                     | 0.56              |
| 2:B:484:ILE:O    | 2:B:488:THR:HG23 | 2.05                     | 0.56              |
| 1:C:463:TRP:HA   | 1:C:467:GLY:HA3  | 1.88                     | 0.56              |
| 1:A:443:ILE:HG22 | 1:A:449:MET:HE1  | 1.88                     | 0.56              |
| 1:A:721:THR:O    | 1:A:725:VAL:HG22 | 2.05                     | 0.56              |
| 2:B:151:ARG:NH1  | 2:B:188:PRO:HD3  | 2.21                     | 0.56              |
| 2:D:166:LEU:HD11 | 2:D:212:VAL:HG11 | 1.86                     | 0.56              |
| 2:D:760:GLU:HG3  | 2:D:762:VAL:CG2  | 2.35                     | 0.56              |
| 2:B:342:VAL:HG12 | 2:B:385:ILE:HD12 | 1.87                     | 0.56              |
| 2:B:383:ILE:HD11 | 2:B:445:ASN:HD21 | 1.71                     | 0.56              |
| 2:B:418:LEU:HD21 | 2:B:762:VAL:HG21 | 1.87                     | 0.56              |
| 1:C:443:ILE:HG22 | 1:C:449:MET:HE1  | 1.88                     | 0.56              |
| 1:A:517:THR:O    | 1:A:520:THR:OG1  | 2.21                     | 0.55              |
| 2:B:154:LEU:HD13 | 2:B:185:PHE:HZ   | 1.71                     | 0.55              |
| 2:B:519:PHE:CE2  | 2:B:523:LEU:HD11 | 2.41                     | 0.55              |
| 2:D:151:ARG:NH1  | 2:D:188:PRO:HD3  | 2.21                     | 0.55              |
| 1:A:255:GLU:HG2  | 1:A:303:TYR:CZ   | 2.41                     | 0.55              |
| 2:B:760:GLU:HG3  | 2:B:762:VAL:CG2  | 2.36                     | 0.55              |
| 2:D:154:LEU:HD13 | 2:D:185:PHE:HZ   | 1.71                     | 0.55              |
| 2:D:383:ILE:HD11 | 2:D:445:ASN:HD21 | 1.71                     | 0.55              |
| 2:D:553:TYR:CZ   | 2:D:588:ASN:HB3  | 2.41                     | 0.55              |
| 2:B:195:LEU:HB3  | 2:B:196:PRO:HD3  | 1.87                     | 0.55              |
| 1:A:218:GLU:HB3  | 1:A:223:MET:CE   | 2.37                     | 0.55              |
| 1:C:323:THR:H    | 1:C:326:HIS:HD2  | 1.54                     | 0.55              |
| 2:D:519:PHE:CE2  | 2:D:523:LEU:HD11 | 2.41                     | 0.55              |
| 2:D:284:PHE:CZ   | 2:D:291:LEU:HD12 | 2.42                     | 0.55              |
| 1:A:480:CYS:O    | 1:A:484:ILE:HG12 | 2.06                     | 0.55              |
| 2:B:284:PHE:CZ   | 2:B:291:LEU:HD12 | 2.42                     | 0.55              |
| 2:B:482:MET:HE2  | 2:B:585:GLY:HA3  | 1.89                     | 0.55              |
| 1:C:480:CYS:O    | 1:C:484:ILE:HG12 | 2.06                     | 0.55              |
| 1:C:637:ASN:ND2  | 1:C:662:ASP:OD2  | 2.40                     | 0.55              |
| 2:B:154:LEU:HD13 | 2:B:185:PHE:CZ   | 2.42                     | 0.55              |
| 2:B:154:LEU:HD23 | 2:B:158:VAL:HG23 | 1.89                     | 0.55              |
| 2:B:553:TYR:CZ   | 2:B:588:ASN:HB3  | 2.41                     | 0.55              |
| 1:C:297:GLN:O    | 1:C:301:VAL:HG23 | 2.07                     | 0.55              |
| 1:C:590:LEU:HD11 | 1:C:602:TYR:OH   | 2.07                     | 0.55              |
| 2:D:594:ARG:HG2  | 2:D:736:GLN:HB3  | 1.89                     | 0.55              |
| 2:D:628:TYR:CE2  | 2:D:702:TYR:HB2  | 2.41                     | 0.55              |

*Continued on next page...*

*Continued from previous page...*

| Atom-1           | Atom-2           | Interatomic distance (Å) | Clash overlap (Å) |
|------------------|------------------|--------------------------|-------------------|
| 1:A:257:LEU:O    | 1:A:262:ALA:HB2  | 2.07                     | 0.55              |
| 1:C:255:GLU:HG2  | 1:C:303:TYR:CZ   | 2.41                     | 0.55              |
| 1:C:601:THR:CG2  | 1:C:605:MET:HB2  | 2.36                     | 0.55              |
| 2:D:325:LEU:HD22 | 2:D:346:TYR:CD1  | 2.41                     | 0.55              |
| 1:A:323:THR:H    | 1:A:326:HIS:HD2  | 1.54                     | 0.55              |
| 1:A:465:LYS:NZ   | 1:A:757:ARG:O    | 2.40                     | 0.55              |
| 2:B:381:GLY:HA2  | 2:B:449:MET:CE   | 2.37                     | 0.55              |
| 1:C:267:GLN:HA   | 1:C:286:GLU:O    | 2.07                     | 0.55              |
| 1:C:489:ALA:O    | 2:D:634:SER:OG   | 2.22                     | 0.55              |
| 1:C:618:LEU:O    | 1:C:622:LEU:HD13 | 2.06                     | 0.55              |
| 2:D:179:ARG:N    | 2:D:182:ASP:OD2  | 2.29                     | 0.55              |
| 1:A:267:GLN:HA   | 1:A:286:GLU:O    | 2.07                     | 0.55              |
| 2:B:722:VAL:HG13 | 1:C:719:GLY:CA   | 2.37                     | 0.55              |
| 1:A:199:LEU:O    | 1:A:202:LEU:HD22 | 2.07                     | 0.54              |
| 1:A:637:ASN:ND2  | 1:A:662:ASP:OD2  | 2.40                     | 0.54              |
| 2:B:202:LEU:HD11 | 2:B:253:TYR:HE2  | 1.72                     | 0.54              |
| 2:B:764:VAL:HG12 | 2:B:773:ASP:O    | 2.07                     | 0.54              |
| 1:C:257:LEU:O    | 1:C:262:ALA:HB2  | 2.07                     | 0.54              |
| 1:C:383:ILE:HD11 | 1:C:445:ASN:HB3  | 1.87                     | 0.54              |
| 1:C:583:VAL:HG21 | 2:D:698:LEU:CD1  | 2.36                     | 0.54              |
| 1:A:685:MET:O    | 1:A:689:THR:OG1  | 2.08                     | 0.54              |
| 1:C:199:LEU:O    | 1:C:202:LEU:HD22 | 2.07                     | 0.54              |
| 2:D:202:LEU:HD11 | 2:D:253:TYR:HE2  | 1.72                     | 0.54              |
| 1:C:218:GLU:HB3  | 1:C:223:MET:CE   | 2.37                     | 0.54              |
| 1:C:475:VAL:O    | 1:C:479:LEU:HD23 | 2.07                     | 0.54              |
| 2:D:154:LEU:HD23 | 2:D:158:VAL:HG23 | 1.89                     | 0.54              |
| 1:C:582:LEU:HD23 | 2:D:631:ALA:CB   | 2.37                     | 0.54              |
| 2:D:195:LEU:HB3  | 2:D:196:PRO:HD3  | 1.87                     | 0.54              |
| 2:B:421:LEU:HD21 | 2:B:458:LEU:HD13 | 1.89                     | 0.54              |
| 2:B:494:LEU:HD12 | 1:C:637:ASN:HB3  | 1.89                     | 0.54              |
| 2:D:381:GLY:HA2  | 2:D:449:MET:CE   | 2.37                     | 0.54              |
| 1:A:475:VAL:O    | 1:A:479:LEU:HD23 | 2.07                     | 0.54              |
| 2:D:336:ARG:O    | 2:D:340:LYS:HG2  | 2.07                     | 0.54              |
| 1:A:618:LEU:O    | 1:A:622:LEU:HD13 | 2.06                     | 0.54              |
| 1:A:454:PRO:O    | 1:A:458:LEU:N    | 2.19                     | 0.54              |
| 1:A:474:ASN:OD1  | 1:A:475:VAL:N    | 2.41                     | 0.54              |
| 1:A:637:ASN:O    | 1:A:662:ASP:HB3  | 2.08                     | 0.54              |
| 1:A:700:VAL:O    | 1:A:704:ILE:HG12 | 2.08                     | 0.54              |
| 1:C:409:TRP:HB2  | 1:C:799:PRO:HA   | 1.90                     | 0.54              |
| 2:B:532:LEU:HG   | 2:B:538:PRO:HG3  | 1.90                     | 0.54              |
| 2:B:721:THR:HG21 | 1:C:715:ILE:HD13 | 1.90                     | 0.54              |

*Continued on next page...*

*Continued from previous page...*

| Atom-1           | Atom-2           | Interatomic distance (Å) | Clash overlap (Å) |
|------------------|------------------|--------------------------|-------------------|
| 1:C:582:LEU:HD23 | 2:D:631:ALA:HA   | 1.90                     | 0.54              |
| 2:D:154:LEU:HD13 | 2:D:185:PHE:CZ   | 2.42                     | 0.54              |
| 2:D:764:VAL:HG12 | 2:D:773:ASP:O    | 2.07                     | 0.54              |
| 1:A:590:LEU:HD11 | 1:A:602:TYR:OH   | 2.07                     | 0.53              |
| 2:B:168:GLY:C    | 2:B:171:PRO:HD2  | 2.29                     | 0.53              |
| 2:B:265:HIS:NE2  | 2:B:312:ALA:HA   | 2.23                     | 0.53              |
| 2:D:421:LEU:HD21 | 2:D:458:LEU:HD13 | 1.89                     | 0.53              |
| 1:A:297:GLN:O    | 1:A:301:VAL:HG23 | 2.07                     | 0.53              |
| 2:D:516:ILE:O    | 2:D:520:THR:HG23 | 2.08                     | 0.53              |
| 2:B:671:LEU:O    | 2:B:674:PHE:HB2  | 2.09                     | 0.53              |
| 2:B:676:LEU:CD1  | 2:B:699:LEU:HD21 | 2.35                     | 0.53              |
| 2:D:485:PHE:CE2  | 2:D:582:LEU:HD22 | 2.44                     | 0.53              |
| 1:A:623:LEU:HD12 | 2:D:586:TRP:O    | 2.09                     | 0.53              |
| 2:B:594:ARG:HG2  | 2:B:736:GLN:HB3  | 1.89                     | 0.53              |
| 1:C:474:ASN:OD1  | 1:C:475:VAL:N    | 2.41                     | 0.53              |
| 1:C:700:VAL:O    | 1:C:704:ILE:HG12 | 2.08                     | 0.53              |
| 2:D:170:LEU:CD2  | 2:D:219:ARG:HG3  | 2.38                     | 0.53              |
| 1:A:186:ARG:NH2  | 1:A:191:GLY:O    | 2.42                     | 0.53              |
| 1:A:409:TRP:HB2  | 1:A:799:PRO:HA   | 1.90                     | 0.53              |
| 1:A:697:ILE:HD11 | 2:D:580:PHE:HZ   | 1.73                     | 0.53              |
| 2:B:418:LEU:CD2  | 2:B:762:VAL:HG21 | 2.39                     | 0.53              |
| 2:D:258:VAL:HA   | 2:D:262:ALA:CB   | 2.38                     | 0.53              |
| 2:D:332:ALA:O    | 2:D:382:LYS:HD2  | 2.09                     | 0.53              |
| 2:B:258:VAL:HA   | 2:B:262:ALA:CB   | 2.38                     | 0.53              |
| 1:C:180:LEU:HD21 | 1:C:213:LEU:HD12 | 1.91                     | 0.53              |
| 1:C:249:ARG:HD2  | 1:C:297:GLN:HE21 | 1.74                     | 0.53              |
| 2:D:413:PRO:O    | 2:D:783:VAL:HG13 | 2.09                     | 0.53              |
| 2:D:443:ILE:HG22 | 2:D:446:ARG:NE   | 2.24                     | 0.53              |
| 2:D:532:LEU:HG   | 2:D:538:PRO:HG3  | 1.90                     | 0.53              |
| 2:D:671:LEU:O    | 2:D:674:PHE:HB2  | 2.09                     | 0.53              |
| 1:A:166:LEU:HD13 | 1:A:212:VAL:HG11 | 1.91                     | 0.53              |
| 1:A:386:PHE:CZ   | 1:A:390:ILE:HD11 | 2.44                     | 0.53              |
| 2:B:332:ALA:O    | 2:B:382:LYS:HD2  | 2.09                     | 0.53              |
| 2:B:336:ARG:O    | 2:B:340:LYS:HG2  | 2.07                     | 0.53              |
| 2:B:383:ILE:HD11 | 2:B:445:ASN:OD1  | 2.08                     | 0.53              |
| 2:B:485:PHE:CE2  | 2:B:582:LEU:HD22 | 2.43                     | 0.53              |
| 2:B:486:THR:HG23 | 1:C:630:SER:OG   | 2.08                     | 0.53              |
| 1:C:342:VAL:HG12 | 1:C:385:ILE:HD12 | 1.90                     | 0.53              |
| 1:C:465:LYS:NZ   | 1:C:757:ARG:O    | 2.40                     | 0.53              |
| 2:D:375:MET:HG2  | 2:D:433:VAL:HG22 | 1.89                     | 0.53              |
| 2:B:677:THR:HA   | 2:B:703:ILE:CD1  | 2.39                     | 0.53              |

*Continued on next page...*



*Continued from previous page...*

| Atom-1           | Atom-2           | Interatomic distance (Å) | Clash overlap (Å) |
|------------------|------------------|--------------------------|-------------------|
| 2:D:693:VAL:O    | 2:D:697:ILE:HG12 | 2.09                     | 0.53              |
| 1:A:342:VAL:HG12 | 1:A:385:ILE:HD12 | 1.90                     | 0.53              |
| 1:A:502:TYR:CE2  | 1:A:511:LEU:HB2  | 2.44                     | 0.53              |
| 1:C:471:PHE:HE2  | 1:C:595:GLY:HA3  | 1.74                     | 0.53              |
| 1:C:637:ASN:O    | 1:C:662:ASP:HB3  | 2.08                     | 0.53              |
| 2:D:383:ILE:HD11 | 2:D:445:ASN:OD1  | 2.08                     | 0.53              |
| 1:A:253:TYR:HB3  | 1:A:257:LEU:HD13 | 1.91                     | 0.53              |
| 1:A:421:LEU:CD2  | 1:A:778:PHE:HB2  | 2.39                     | 0.53              |
| 1:A:698:LEU:CD1  | 2:D:583:VAL:HG11 | 2.39                     | 0.53              |
| 2:B:265:HIS:HE2  | 2:B:312:ALA:HA   | 1.74                     | 0.53              |
| 2:B:413:PRO:O    | 2:B:783:VAL:HG13 | 2.09                     | 0.53              |
| 2:B:516:ILE:O    | 2:B:520:THR:HG23 | 2.08                     | 0.53              |
| 4:B:901:HCO:C27  | 3:B:902:POV:H15B | 2.39                     | 0.53              |
| 1:C:151:ARG:NH1  | 1:C:188:PRO:HD3  | 2.24                     | 0.53              |
| 1:C:386:PHE:CZ   | 1:C:390:ILE:HD11 | 2.44                     | 0.53              |
| 1:A:418:LEU:CD2  | 1:A:762:VAL:HG11 | 2.39                     | 0.52              |
| 1:C:198:ALA:HB1  | 1:C:210:ILE:HD11 | 1.90                     | 0.52              |
| 1:C:418:LEU:CD2  | 1:C:762:VAL:HG11 | 2.39                     | 0.52              |
| 2:D:265:HIS:NE2  | 2:D:312:ALA:HA   | 2.23                     | 0.52              |
| 2:D:418:LEU:CD2  | 2:D:762:VAL:HG21 | 2.39                     | 0.52              |
| 1:A:608:LYS:O    | 1:A:612:LYS:HB2  | 2.09                     | 0.52              |
| 2:B:443:ILE:HG22 | 2:B:446:ARG:NE   | 2.24                     | 0.52              |
| 2:D:168:GLY:C    | 2:D:171:PRO:HD2  | 2.29                     | 0.52              |
| 2:B:375:MET:HG2  | 2:B:433:VAL:HG22 | 1.89                     | 0.52              |
| 2:B:584:LEU:HD23 | 2:B:587:MET:CE   | 2.39                     | 0.52              |
| 1:C:180:LEU:HD11 | 1:C:194:CYS:SG   | 2.50                     | 0.52              |
| 2:D:265:HIS:HE2  | 2:D:312:ALA:HA   | 1.74                     | 0.52              |
| 1:C:502:TYR:CE2  | 1:C:511:LEU:HB2  | 2.44                     | 0.52              |
| 1:A:249:ARG:HD2  | 1:A:297:GLN:HE21 | 1.74                     | 0.52              |
| 2:D:453:GLU:HB2  | 2:D:454:PRO:HD3  | 1.92                     | 0.52              |
| 2:B:721:THR:HB   | 1:C:715:ILE:CG2  | 2.39                     | 0.52              |
| 1:C:253:TYR:HB3  | 1:C:257:LEU:HD13 | 1.91                     | 0.52              |
| 2:D:450:LEU:HD12 | 2:D:735:LEU:HD23 | 1.92                     | 0.52              |
| 1:A:505:THR:O    | 1:A:509:LEU:HG   | 2.10                     | 0.52              |
| 2:B:170:LEU:CD2  | 2:B:219:ARG:HG3  | 2.38                     | 0.52              |
| 1:A:198:ALA:HB1  | 1:A:210:ILE:HD11 | 1.90                     | 0.52              |
| 2:B:453:GLU:HB2  | 2:B:454:PRO:HD3  | 1.92                     | 0.52              |
| 1:C:186:ARG:NH2  | 1:C:191:GLY:O    | 2.42                     | 0.52              |
| 1:C:694:VAL:O    | 1:C:698:LEU:HD23 | 2.10                     | 0.52              |
| 2:D:227:ILE:HG23 | 2:D:257:LEU:HD22 | 1.92                     | 0.52              |
| 2:D:296:ASN:HA   | 2:D:345:MET:HE3  | 1.92                     | 0.52              |

*Continued on next page...*

*Continued from previous page...*

| Atom-1           | Atom-2           | Interatomic distance (Å) | Clash overlap (Å) |
|------------------|------------------|--------------------------|-------------------|
| 2:D:584:LEU:HD23 | 2:D:587:MET:CE   | 2.39                     | 0.52              |
| 2:D:677:THR:HA   | 2:D:703:ILE:CD1  | 2.39                     | 0.52              |
| 1:A:151:ARG:NH1  | 1:A:188:PRO:HD3  | 2.24                     | 0.52              |
| 1:A:180:LEU:HD11 | 1:A:194:CYS:SG   | 2.50                     | 0.52              |
| 2:B:689:THR:O    | 2:B:691:TYR:N    | 2.42                     | 0.52              |
| 1:C:218:GLU:HB3  | 1:C:223:MET:HE3  | 1.92                     | 0.52              |
| 1:C:563:SER:OG   | 1:C:577:VAL:HG12 | 2.10                     | 0.52              |
| 2:D:527:THR:HA   | 2:D:530:LYS:CG   | 2.40                     | 0.52              |
| 4:D:901:HCO:C27  | 3:D:902:POV:H15B | 2.40                     | 0.52              |
| 1:A:518:LEU:O    | 1:A:522:VAL:HG23 | 2.10                     | 0.52              |
| 2:B:450:LEU:HD12 | 2:B:735:LEU:HD23 | 1.92                     | 0.52              |
| 2:B:604:ILE:HD11 | 2:B:736:GLN:OE1  | 2.10                     | 0.52              |
| 2:B:737:TRP:CZ2  | 2:B:741:ILE:HD11 | 2.45                     | 0.52              |
| 1:C:383:ILE:HD12 | 1:C:383:ILE:H    | 1.75                     | 0.52              |
| 1:C:517:THR:O    | 1:C:520:THR:OG1  | 2.21                     | 0.52              |
| 1:A:180:LEU:HD21 | 1:A:213:LEU:HD12 | 1.91                     | 0.51              |
| 1:A:563:SER:OG   | 1:A:577:VAL:HG12 | 2.10                     | 0.51              |
| 1:A:601:THR:HG22 | 1:A:605:MET:HB2  | 1.91                     | 0.51              |
| 2:B:163:THR:O    | 2:B:166:LEU:HG   | 2.10                     | 0.51              |
| 2:B:507:ASP:OD1  | 2:B:510:ARG:NH1  | 2.41                     | 0.51              |
| 2:B:583:VAL:HG11 | 1:C:698:LEU:CD1  | 2.39                     | 0.51              |
| 1:C:421:LEU:CD2  | 1:C:778:PHE:HB2  | 2.40                     | 0.51              |
| 1:C:518:LEU:O    | 1:C:522:VAL:HG23 | 2.10                     | 0.51              |
| 2:B:598:LEU:HD12 | 1:C:616:ARG:HE   | 1.74                     | 0.51              |
| 1:C:505:THR:O    | 1:C:509:LEU:HG   | 2.10                     | 0.51              |
| 2:D:163:THR:O    | 2:D:166:LEU:HG   | 2.10                     | 0.51              |
| 2:D:233:ASP:O    | 2:D:237:ARG:HG2  | 2.11                     | 0.51              |
| 1:A:383:ILE:HD12 | 1:A:383:ILE:H    | 1.75                     | 0.51              |
| 1:A:471:PHE:HE2  | 1:A:595:GLY:HA3  | 1.74                     | 0.51              |
| 2:B:693:VAL:O    | 2:B:697:ILE:HG12 | 2.09                     | 0.51              |
| 2:B:233:ASP:OD1  | 2:B:234:ILE:N    | 2.44                     | 0.51              |
| 1:C:166:LEU:HD13 | 1:C:212:VAL:HG11 | 1.91                     | 0.51              |
| 1:C:610:LEU:O    | 1:C:614:LEU:HB2  | 2.11                     | 0.51              |
| 2:D:604:ILE:HD11 | 2:D:736:GLN:OE1  | 2.10                     | 0.51              |
| 2:D:689:THR:O    | 2:D:691:TYR:N    | 2.42                     | 0.51              |
| 1:A:307:ASN:OD1  | 1:A:311:LYS:HG2  | 2.10                     | 0.51              |
| 1:A:694:VAL:O    | 1:A:698:LEU:HD23 | 2.10                     | 0.51              |
| 2:D:443:ILE:HG22 | 2:D:446:ARG:CZ   | 2.41                     | 0.51              |
| 2:B:722:VAL:HG13 | 1:C:719:GLY:HA2  | 1.93                     | 0.51              |
| 1:C:608:LYS:O    | 1:C:612:LYS:HB2  | 2.09                     | 0.51              |
| 1:C:699:LEU:O    | 1:C:703:ILE:HG12 | 2.11                     | 0.51              |

*Continued on next page...*

*Continued from previous page...*

| Atom-1           | Atom-2           | Interatomic distance (Å) | Clash overlap (Å) |
|------------------|------------------|--------------------------|-------------------|
| 2:D:214:LEU:CD1  | 2:D:227:ILE:HD11 | 2.40                     | 0.51              |
| 2:D:507:ASP:OD1  | 2:D:510:ARG:NH1  | 2.41                     | 0.51              |
| 1:A:610:LEU:O    | 1:A:614:LEU:HB2  | 2.11                     | 0.51              |
| 1:A:720:GLU:O    | 1:A:723:GLY:N    | 2.28                     | 0.51              |
| 2:B:249:ARG:HG2  | 2:B:297:GLN:NE2  | 2.24                     | 0.51              |
| 2:B:724:GLN:O    | 2:B:726:SER:N    | 2.44                     | 0.51              |
| 2:D:425:ASP:HB2  | 2:D:458:LEU:HD21 | 1.93                     | 0.51              |
| 2:D:499:PRO:HD2  | 2:D:567:TYR:CE1  | 2.46                     | 0.51              |
| 1:A:474:ASN:HB3  | 3:A:902:POV:O13  | 2.10                     | 0.51              |
| 2:B:227:ILE:HG23 | 2:B:257:LEU:HD22 | 1.92                     | 0.51              |
| 2:B:425:ASP:HB2  | 2:B:458:LEU:HD21 | 1.93                     | 0.51              |
| 2:B:499:PRO:HD2  | 2:B:567:TYR:CE1  | 2.46                     | 0.51              |
| 2:B:527:THR:HA   | 2:B:530:LYS:CG   | 2.40                     | 0.51              |
| 2:D:409:TRP:HA   | 2:D:794:ILE:HG23 | 1.93                     | 0.51              |
| 2:D:671:LEU:HA   | 2:D:674:PHE:CD2  | 2.46                     | 0.51              |
| 1:A:413:PRO:O    | 1:A:783:VAL:HG13 | 2.11                     | 0.51              |
| 1:C:697:ILE:HD12 | 1:C:698:LEU:HD22 | 1.92                     | 0.51              |
| 2:D:724:GLN:O    | 2:D:726:SER:N    | 2.44                     | 0.51              |
| 2:B:694:VAL:O    | 2:B:698:LEU:HD23 | 2.11                     | 0.51              |
| 2:D:153:ILE:O    | 2:D:157:ILE:HG13 | 2.11                     | 0.51              |
| 2:D:694:VAL:O    | 2:D:698:LEU:HD23 | 2.11                     | 0.51              |
| 2:D:737:TRP:CZ2  | 2:D:741:ILE:HD11 | 2.45                     | 0.51              |
| 1:A:697:ILE:HD12 | 1:A:698:LEU:HD22 | 1.92                     | 0.50              |
| 1:C:582:LEU:HD23 | 2:D:631:ALA:CA   | 2.41                     | 0.50              |
| 2:D:502:TYR:HB3  | 2:D:507:ASP:HB3  | 1.93                     | 0.50              |
| 1:A:633:VAL:HA   | 1:A:636:LEU:CD2  | 2.42                     | 0.50              |
| 1:A:698:LEU:HD11 | 2:D:583:VAL:HG11 | 1.93                     | 0.50              |
| 1:A:718:MET:HA   | 1:A:722:VAL:HG21 | 1.93                     | 0.50              |
| 1:A:718:MET:HA   | 1:A:722:VAL:CG2  | 2.41                     | 0.50              |
| 1:C:601:THR:HG22 | 1:C:605:MET:HB2  | 1.91                     | 0.50              |
| 2:D:150:ASN:H    | 2:D:153:ILE:HB   | 1.76                     | 0.50              |
| 2:D:233:ASP:OD1  | 2:D:234:ILE:N    | 2.44                     | 0.50              |
| 2:D:439:TYR:O    | 2:D:446:ARG:NH2  | 2.45                     | 0.50              |
| 1:A:699:LEU:O    | 1:A:703:ILE:HG12 | 2.11                     | 0.50              |
| 2:B:179:ARG:HG3  | 2:B:220:THR:CB   | 2.42                     | 0.50              |
| 2:B:714:LEU:O    | 2:B:718:MET:HG2  | 2.12                     | 0.50              |
| 2:B:733:TRP:O    | 2:B:736:GLN:N    | 2.44                     | 0.50              |
| 1:C:307:ASN:OD1  | 1:C:311:LYS:HG2  | 2.10                     | 0.50              |
| 1:C:718:MET:HA   | 1:C:722:VAL:CG2  | 2.41                     | 0.50              |
| 2:D:760:GLU:OE2  | 2:D:779:ARG:NH1  | 2.45                     | 0.50              |
| 1:A:527:THR:HA   | 1:A:530:LYS:HE3  | 1.94                     | 0.50              |

*Continued on next page...*



*Continued from previous page...*

| Atom-1           | Atom-2           | Interatomic distance (Å) | Clash overlap (Å) |
|------------------|------------------|--------------------------|-------------------|
| 2:B:214:LEU:CD1  | 2:B:227:ILE:HD11 | 2.40                     | 0.50              |
| 2:B:233:ASP:O    | 2:B:237:ARG:HG2  | 2.11                     | 0.50              |
| 2:B:443:ILE:HG22 | 2:B:446:ARG:CZ   | 2.41                     | 0.50              |
| 2:B:671:LEU:HA   | 2:B:674:PHE:CD2  | 2.46                     | 0.50              |
| 1:C:413:PRO:O    | 1:C:783:VAL:HG13 | 2.11                     | 0.50              |
| 2:D:222:ASN:O    | 2:D:226:PHE:N    | 2.42                     | 0.50              |
| 2:B:346:TYR:CG   | 2:B:385:ILE:HD11 | 2.46                     | 0.50              |
| 2:B:760:GLU:OE2  | 2:B:779:ARG:NH1  | 2.44                     | 0.50              |
| 1:C:514:GLU:O    | 1:C:518:LEU:HG   | 2.11                     | 0.50              |
| 2:B:153:ILE:O    | 2:B:157:ILE:HG13 | 2.11                     | 0.50              |
| 1:C:250:CYS:O    | 1:C:254:VAL:HG23 | 2.12                     | 0.50              |
| 1:C:787:HIS:O    | 1:C:790:GLN:HG3  | 2.12                     | 0.50              |
| 2:D:714:LEU:O    | 2:D:718:MET:HG2  | 2.12                     | 0.50              |
| 1:A:413:PRO:HG3  | 1:A:788:TRP:CH2  | 2.47                     | 0.50              |
| 1:A:583:VAL:HG21 | 2:B:698:LEU:HD11 | 1.94                     | 0.50              |
| 1:A:787:HIS:O    | 1:A:790:GLN:HG3  | 2.12                     | 0.50              |
| 1:C:720:GLU:O    | 1:C:723:GLY:N    | 2.28                     | 0.50              |
| 1:A:514:GLU:O    | 1:A:518:LEU:HG   | 2.11                     | 0.50              |
| 2:B:502:TYR:HB3  | 2:B:507:ASP:HB3  | 1.93                     | 0.50              |
| 1:C:633:VAL:HA   | 1:C:636:LEU:CD2  | 2.42                     | 0.50              |
| 2:B:409:TRP:HA   | 2:B:794:ILE:HG23 | 1.93                     | 0.49              |
| 2:B:485:PHE:CD1  | 2:B:517:THR:HG21 | 2.47                     | 0.49              |
| 2:B:583:VAL:HB   | 1:C:628:TYR:HE1  | 1.77                     | 0.49              |
| 2:D:346:TYR:CG   | 2:D:385:ILE:HD11 | 2.46                     | 0.49              |
| 1:C:192:LYS:HD3  | 1:C:197:LYS:CE   | 2.41                     | 0.49              |
| 2:B:439:TYR:O    | 2:B:446:ARG:NH2  | 2.45                     | 0.49              |
| 2:B:661:ARG:CB   | 2:B:665:THR:HG21 | 2.42                     | 0.49              |
| 2:D:170:LEU:HD22 | 2:D:219:ARG:HG3  | 1.94                     | 0.49              |
| 2:D:502:TYR:HD1  | 2:D:507:ASP:HB3  | 1.77                     | 0.49              |
| 2:D:701:THR:O    | 2:D:705:LEU:HD23 | 2.12                     | 0.49              |
| 2:B:222:ASN:O    | 2:B:226:PHE:N    | 2.42                     | 0.49              |
| 2:B:639:CYS:HB2  | 2:B:663:SER:HB3  | 1.95                     | 0.49              |
| 2:B:701:THR:O    | 2:B:705:LEU:HD23 | 2.12                     | 0.49              |
| 1:C:413:PRO:HG3  | 1:C:788:TRP:CH2  | 2.47                     | 0.49              |
| 2:B:150:ASN:H    | 2:B:153:ILE:HB   | 1.76                     | 0.49              |
| 1:C:275:PRO:CG   | 1:C:320:ARG:HH12 | 2.24                     | 0.49              |
| 1:C:474:ASN:HD22 | 3:C:902:POV:H12A | 1.76                     | 0.49              |
| 1:C:685:MET:HA   | 1:C:689:THR:CG2  | 2.41                     | 0.49              |
| 1:C:717:LEU:HD11 | 2:D:715:ILE:HD12 | 1.94                     | 0.49              |
| 1:A:275:PRO:CG   | 1:A:320:ARG:HH12 | 2.24                     | 0.49              |
| 2:B:297:GLN:O    | 2:B:301:VAL:HG23 | 2.12                     | 0.49              |

*Continued on next page...*

*Continued from previous page...*

| Atom-1           | Atom-2           | Interatomic distance (Å) | Clash overlap (Å) |
|------------------|------------------|--------------------------|-------------------|
| 1:C:559:LEU:HD11 | 1:C:577:VAL:HG13 | 1.94                     | 0.49              |
| 1:C:718:MET:HA   | 1:C:722:VAL:HG21 | 1.93                     | 0.49              |
| 1:C:366:LEU:HD22 | 1:C:370:GLY:O    | 2.13                     | 0.49              |
| 2:D:179:ARG:HG3  | 2:D:220:THR:CB   | 2.42                     | 0.49              |
| 2:D:284:PHE:CE2  | 2:D:291:LEU:HD12 | 2.48                     | 0.49              |
| 2:D:297:GLN:O    | 2:D:301:VAL:HG23 | 2.12                     | 0.49              |
| 2:D:639:CYS:HB2  | 2:D:663:SER:HB3  | 1.95                     | 0.49              |
| 1:A:559:LEU:HD11 | 1:A:577:VAL:HG13 | 1.94                     | 0.49              |
| 2:D:359:ASP:OD1  | 2:D:360:SER:N    | 2.46                     | 0.49              |
| 2:D:733:TRP:O    | 2:D:736:GLN:N    | 2.44                     | 0.49              |
| 1:A:250:CYS:O    | 1:A:254:VAL:HG23 | 2.12                     | 0.49              |
| 2:B:264:VAL:HG12 | 2:B:312:ALA:HB2  | 1.94                     | 0.49              |
| 2:B:485:PHE:CE1  | 2:B:517:THR:HG21 | 2.48                     | 0.49              |
| 2:D:249:ARG:HG2  | 2:D:297:GLN:NE2  | 2.24                     | 0.49              |
| 2:D:314:MET:HE1  | 2:D:353:CYS:N    | 2.28                     | 0.49              |
| 1:A:317:GLN:HE21 | 1:A:365:VAL:CG1  | 2.26                     | 0.48              |
| 1:C:488:THR:CG2  | 1:C:513:GLY:HA3  | 2.42                     | 0.48              |
| 2:D:202:LEU:CG   | 2:D:205:GLY:HA2  | 2.33                     | 0.48              |
| 2:D:485:PHE:CD1  | 2:D:517:THR:HG21 | 2.48                     | 0.48              |
| 1:A:366:LEU:HD22 | 1:A:370:GLY:O    | 2.13                     | 0.48              |
| 2:B:170:LEU:HD22 | 2:B:219:ARG:HG3  | 1.95                     | 0.48              |
| 1:C:527:THR:HA   | 1:C:530:LYS:HE3  | 1.94                     | 0.48              |
| 2:D:511:LEU:O    | 2:D:515:VAL:HG23 | 2.13                     | 0.48              |
| 2:D:595:GLY:C    | 2:D:596:LEU:HD12 | 2.34                     | 0.48              |
| 2:D:661:ARG:CB   | 2:D:665:THR:HG21 | 2.42                     | 0.48              |
| 1:A:413:PRO:HG3  | 1:A:788:TRP:CZ3  | 2.49                     | 0.48              |
| 2:B:179:ARG:HG2  | 2:B:222:ASN:OD1  | 2.13                     | 0.48              |
| 1:A:619:LEU:O    | 1:A:623:LEU:HD23 | 2.13                     | 0.48              |
| 2:B:284:PHE:CE2  | 2:B:291:LEU:HD12 | 2.48                     | 0.48              |
| 1:C:482:MET:CE   | 1:C:585:GLY:HA3  | 2.43                     | 0.48              |
| 2:D:535:LYS:HD2  | 2:D:746:ARG:NH2  | 2.28                     | 0.48              |
| 1:A:488:THR:CG2  | 1:A:513:GLY:HA3  | 2.42                     | 0.48              |
| 1:A:510:ARG:O    | 1:A:514:GLU:HG2  | 2.14                     | 0.48              |
| 2:B:359:ASP:OD1  | 2:B:360:SER:N    | 2.46                     | 0.48              |
| 2:B:511:LEU:O    | 2:B:515:VAL:HG23 | 2.13                     | 0.48              |
| 2:B:535:LYS:HD2  | 2:B:746:ARG:NH2  | 2.28                     | 0.48              |
| 1:C:258:VAL:HG13 | 1:C:309:HIS:CE1  | 2.49                     | 0.48              |
| 1:C:406:PHE:CG   | 1:C:764:VAL:HG21 | 2.49                     | 0.48              |
| 1:C:413:PRO:HG3  | 1:C:788:TRP:CZ3  | 2.48                     | 0.48              |
| 2:D:636:LEU:HD23 | 2:D:637:ASN:O    | 2.14                     | 0.48              |
| 1:A:258:VAL:HG13 | 1:A:309:HIS:CE1  | 2.49                     | 0.48              |

*Continued on next page...*

*Continued from previous page...*

| Atom-1           | Atom-2           | Interatomic distance (Å) | Clash overlap (Å) |
|------------------|------------------|--------------------------|-------------------|
| 1:C:510:ARG:O    | 1:C:514:GLU:HG2  | 2.14                     | 0.48              |
| 2:D:324:VAL:HG11 | 2:D:349:LEU:HD23 | 1.96                     | 0.48              |
| 2:D:482:MET:HE1  | 2:D:585:GLY:HA3  | 1.95                     | 0.48              |
| 1:A:314:MET:HE1  | 1:A:352:LYS:C    | 2.34                     | 0.48              |
| 1:C:156:ASP:OD2  | 1:C:160:ARG:NH2  | 2.46                     | 0.48              |
| 1:C:317:GLN:HE21 | 1:C:365:VAL:CG1  | 2.26                     | 0.48              |
| 2:D:264:VAL:HG12 | 2:D:312:ALA:HB2  | 1.94                     | 0.48              |
| 1:A:156:ASP:OD2  | 1:A:160:ARG:NH2  | 2.46                     | 0.48              |
| 1:A:218:GLU:HB3  | 1:A:223:MET:HE3  | 1.95                     | 0.48              |
| 1:A:556:TYR:HB2  | 1:A:584:LEU:CD1  | 2.44                     | 0.48              |
| 2:B:499:PRO:HD2  | 2:B:567:TYR:HE1  | 1.79                     | 0.48              |
| 2:B:584:LEU:HD23 | 2:B:587:MET:HE3  | 1.94                     | 0.48              |
| 1:A:676:LEU:HD23 | 1:A:676:LEU:O    | 2.14                     | 0.48              |
| 2:B:595:GLY:C    | 2:B:596:LEU:HD12 | 2.34                     | 0.48              |
| 1:C:593:THR:HB   | 1:C:598:LEU:O    | 2.14                     | 0.48              |
| 2:D:171:PRO:O    | 2:D:175:THR:HG22 | 2.14                     | 0.48              |
| 1:C:604:ILE:O    | 1:C:607:GLN:HB3  | 2.14                     | 0.48              |
| 1:C:764:VAL:HG23 | 1:C:795:ILE:HD13 | 1.96                     | 0.48              |
| 2:D:179:ARG:HG2  | 2:D:222:ASN:OD1  | 2.13                     | 0.48              |
| 1:A:284:PHE:CE2  | 1:A:291:LEU:HB2  | 2.49                     | 0.47              |
| 2:B:255:GLU:HA   | 2:B:303:TYR:CE2  | 2.49                     | 0.47              |
| 2:B:324:VAL:HG11 | 2:B:349:LEU:HD23 | 1.96                     | 0.47              |
| 1:A:150:ASN:OD1  | 1:A:153:ILE:HG22 | 2.14                     | 0.47              |
| 1:A:301:VAL:HG11 | 1:A:349:LEU:HD11 | 1.96                     | 0.47              |
| 1:A:406:PHE:CG   | 1:A:764:VAL:HG21 | 2.49                     | 0.47              |
| 1:A:764:VAL:HG23 | 1:A:795:ILE:HD13 | 1.96                     | 0.47              |
| 2:B:383:ILE:CD1  | 2:B:445:ASN:HD21 | 2.27                     | 0.47              |
| 2:B:502:TYR:HD1  | 2:B:507:ASP:HB3  | 1.78                     | 0.47              |
| 2:B:676:LEU:HD23 | 2:B:676:LEU:O    | 2.14                     | 0.47              |
| 2:B:700:VAL:O    | 2:B:704:ILE:HG12 | 2.14                     | 0.47              |
| 2:D:169:LEU:HD23 | 2:D:216:ILE:HD13 | 1.97                     | 0.47              |
| 2:D:676:LEU:HD23 | 2:D:676:LEU:O    | 2.13                     | 0.47              |
| 1:A:254:VAL:O    | 1:A:258:VAL:HG12 | 2.15                     | 0.47              |
| 1:A:604:ILE:O    | 1:A:607:GLN:HB3  | 2.14                     | 0.47              |
| 1:A:624:PHE:CE1  | 2:D:587:MET:HG2  | 2.49                     | 0.47              |
| 2:B:163:THR:HA   | 2:B:166:LEU:CD2  | 2.44                     | 0.47              |
| 2:B:571:ILE:HG22 | 2:B:573:ALA:H    | 1.79                     | 0.47              |
| 2:B:575:LEU:O    | 2:B:579:VAL:HG23 | 2.14                     | 0.47              |
| 1:C:706:THR:O    | 1:C:710:LEU:HD13 | 2.14                     | 0.47              |
| 2:D:210:ILE:O    | 2:D:214:LEU:HD23 | 2.14                     | 0.47              |
| 2:D:255:GLU:HA   | 2:D:303:TYR:CE2  | 2.49                     | 0.47              |

*Continued on next page...*

*Continued from previous page...*

| Atom-1           | Atom-2           | Interatomic distance (Å) | Clash overlap (Å) |
|------------------|------------------|--------------------------|-------------------|
| 2:D:420:ASP:O    | 2:D:422:SER:N    | 2.48                     | 0.47              |
| 2:D:485:PHE:CE1  | 2:D:517:THR:HG21 | 2.48                     | 0.47              |
| 1:A:706:THR:O    | 1:A:710:LEU:HD13 | 2.14                     | 0.47              |
| 1:A:760:GLU:HG3  | 1:A:762:VAL:CG2  | 2.44                     | 0.47              |
| 2:B:154:LEU:HD11 | 2:B:169:LEU:HD22 | 1.96                     | 0.47              |
| 2:B:686:LEU:O    | 2:B:689:THR:HB   | 2.14                     | 0.47              |
| 1:C:619:LEU:O    | 1:C:623:LEU:HD23 | 2.13                     | 0.47              |
| 1:C:676:LEU:O    | 1:C:676:LEU:HD23 | 2.14                     | 0.47              |
| 2:D:264:VAL:HG11 | 2:D:312:ALA:HB2  | 1.96                     | 0.47              |
| 2:D:575:LEU:O    | 2:D:579:VAL:HG23 | 2.14                     | 0.47              |
| 2:B:252:HIS:O    | 2:B:255:GLU:HB2  | 2.15                     | 0.47              |
| 2:B:497:THR:HB   | 2:B:498:PRO:CD   | 2.44                     | 0.47              |
| 1:C:265:HIS:CE1  | 1:C:312:ALA:HA   | 2.49                     | 0.47              |
| 1:C:636:LEU:CB   | 1:C:689:THR:HG22 | 2.45                     | 0.47              |
| 2:D:571:ILE:HG22 | 2:D:573:ALA:H    | 1.79                     | 0.47              |
| 1:A:593:THR:HB   | 1:A:598:LEU:O    | 2.14                     | 0.47              |
| 2:B:169:LEU:HD23 | 2:B:216:ILE:HD13 | 1.97                     | 0.47              |
| 2:B:573:ALA:HA   | 1:C:691:TYR:OH   | 2.13                     | 0.47              |
| 1:C:794:ILE:HG22 | 1:C:796:ASN:H    | 1.80                     | 0.47              |
| 2:D:252:HIS:O    | 2:D:255:GLU:HB2  | 2.15                     | 0.47              |
| 2:D:761:MET:HA   | 2:D:775:ARG:O    | 2.15                     | 0.47              |
| 1:A:192:LYS:HD3  | 1:A:197:LYS:CE   | 2.41                     | 0.47              |
| 2:B:210:ILE:O    | 2:B:214:LEU:HD23 | 2.14                     | 0.47              |
| 2:B:315:ARG:HG2  | 2:B:362:LEU:HD23 | 1.96                     | 0.47              |
| 2:B:718:MET:HA   | 2:B:721:THR:OG1  | 2.15                     | 0.47              |
| 2:B:720:GLU:O    | 2:B:724:GLN:HB2  | 2.15                     | 0.47              |
| 2:B:754:LYS:O    | 2:B:757:ARG:HG3  | 2.15                     | 0.47              |
| 2:B:761:MET:HA   | 2:B:775:ARG:O    | 2.15                     | 0.47              |
| 1:C:150:ASN:OD1  | 1:C:153:ILE:HG22 | 2.14                     | 0.47              |
| 1:C:284:PHE:CE2  | 1:C:291:LEU:HB2  | 2.49                     | 0.47              |
| 1:C:314:MET:HE1  | 1:C:352:LYS:C    | 2.35                     | 0.47              |
| 1:C:705:LEU:O    | 1:C:708:VAL:HG22 | 2.15                     | 0.47              |
| 2:D:322:ASN:HA   | 2:D:326:HIS:ND1  | 2.30                     | 0.47              |
| 2:D:686:LEU:O    | 2:D:689:THR:HB   | 2.14                     | 0.47              |
| 2:D:700:VAL:O    | 2:D:704:ILE:HG12 | 2.14                     | 0.47              |
| 2:D:720:GLU:O    | 2:D:724:GLN:HB2  | 2.15                     | 0.47              |
| 1:A:479:LEU:O    | 1:A:483:VAL:HG23 | 2.15                     | 0.47              |
| 1:A:685:MET:HA   | 1:A:689:THR:CG2  | 2.41                     | 0.47              |
| 2:B:636:LEU:HD23 | 2:B:637:ASN:O    | 2.14                     | 0.47              |
| 1:C:301:VAL:HG11 | 1:C:349:LEU:HD11 | 1.97                     | 0.47              |
| 1:C:498:PRO:O    | 1:C:500:TYR:N    | 2.43                     | 0.47              |

*Continued on next page...*

*Continued from previous page...*

| Atom-1           | Atom-2           | Interatomic distance (Å) | Clash overlap (Å) |
|------------------|------------------|--------------------------|-------------------|
| 1:C:760:GLU:HG3  | 1:C:762:VAL:CG2  | 2.44                     | 0.47              |
| 1:A:210:ILE:HB   | 1:A:211:PRO:HD3  | 1.97                     | 0.47              |
| 1:A:554:PHE:O    | 1:A:558:VAL:HG23 | 2.15                     | 0.47              |
| 1:A:677:THR:HA   | 1:A:703:ILE:HD12 | 1.97                     | 0.47              |
| 1:A:794:ILE:HG22 | 1:A:796:ASN:H    | 1.80                     | 0.47              |
| 1:C:244:ILE:O    | 1:C:248:ARG:HG2  | 2.15                     | 0.47              |
| 1:C:424:LEU:HD23 | 1:C:455:ILE:CD1  | 2.45                     | 0.47              |
| 2:D:497:THR:HB   | 2:D:498:PRO:CD   | 2.44                     | 0.47              |
| 2:B:163:THR:OG1  | 2:B:212:VAL:HG11 | 2.15                     | 0.47              |
| 2:B:413:PRO:HG3  | 2:B:785:TRP:CZ3  | 2.50                     | 0.47              |
| 2:D:413:PRO:HG3  | 2:D:785:TRP:CZ3  | 2.50                     | 0.47              |
| 2:D:532:LEU:HG   | 2:D:538:PRO:CG   | 2.45                     | 0.47              |
| 1:A:195:LEU:HB3  | 1:A:196:PRO:HD3  | 1.97                     | 0.46              |
| 1:A:636:LEU:CB   | 1:A:689:THR:HG22 | 2.45                     | 0.46              |
| 2:B:149:PHE:CD1  | 2:B:169:LEU:HD13 | 2.51                     | 0.46              |
| 2:B:420:ASP:O    | 2:B:422:SER:N    | 2.48                     | 0.46              |
| 2:D:150:ASN:N    | 2:D:153:ILE:HD12 | 2.31                     | 0.46              |
| 2:D:163:THR:HA   | 2:D:166:LEU:CD2  | 2.44                     | 0.46              |
| 1:A:258:VAL:HG22 | 1:A:309:HIS:HE1  | 1.81                     | 0.46              |
| 1:A:265:HIS:CE1  | 1:A:312:ALA:HA   | 2.49                     | 0.46              |
| 2:B:296:ASN:O    | 2:B:298:PRO:HD3  | 2.16                     | 0.46              |
| 2:B:322:ASN:HA   | 2:B:326:HIS:ND1  | 2.30                     | 0.46              |
| 2:B:527:THR:HA   | 2:B:530:LYS:HG3  | 1.97                     | 0.46              |
| 2:B:532:LEU:HG   | 2:B:538:PRO:CG   | 2.45                     | 0.46              |
| 1:C:275:PRO:HG2  | 1:C:320:ARG:HH12 | 1.79                     | 0.46              |
| 1:C:575:LEU:O    | 1:C:579:VAL:HG23 | 2.15                     | 0.46              |
| 2:D:163:THR:OG1  | 2:D:212:VAL:HG11 | 2.15                     | 0.46              |
| 2:D:326:HIS:CD2  | 2:D:373:PRO:HG3  | 2.50                     | 0.46              |
| 2:D:383:ILE:HD11 | 2:D:445:ASN:ND2  | 2.30                     | 0.46              |
| 2:D:383:ILE:CD1  | 2:D:445:ASN:HD21 | 2.28                     | 0.46              |
| 2:D:480:CYS:O    | 2:D:484:ILE:HG12 | 2.15                     | 0.46              |
| 2:D:524:PHE:O    | 2:D:528:ASN:HB2  | 2.16                     | 0.46              |
| 2:D:754:LYS:O    | 2:D:757:ARG:HG3  | 2.15                     | 0.46              |
| 1:A:275:PRO:HG2  | 1:A:320:ARG:HH12 | 1.79                     | 0.46              |
| 1:A:575:LEU:O    | 1:A:579:VAL:HG23 | 2.15                     | 0.46              |
| 1:A:752:LEU:HD11 | 1:A:756:PHE:HE2  | 1.81                     | 0.46              |
| 2:B:171:PRO:O    | 2:B:175:THR:HG22 | 2.14                     | 0.46              |
| 2:B:527:THR:HG22 | 2:B:530:LYS:CD   | 2.43                     | 0.46              |
| 1:C:210:ILE:HB   | 1:C:211:PRO:HD3  | 1.97                     | 0.46              |
| 1:C:254:VAL:O    | 1:C:258:VAL:HG12 | 2.15                     | 0.46              |
| 1:C:258:VAL:HA   | 1:C:262:ALA:HB3  | 1.97                     | 0.46              |

*Continued on next page...*



*Continued from previous page...*

| Atom-1           | Atom-2           | Interatomic distance (Å) | Clash overlap (Å) |
|------------------|------------------|--------------------------|-------------------|
| 1:C:479:LEU:O    | 1:C:483:VAL:HG23 | 2.15                     | 0.46              |
| 2:D:737:TRP:CE2  | 2:D:741:ILE:HD11 | 2.50                     | 0.46              |
| 1:A:694:VAL:HG11 | 2:D:576:ALA:HB1  | 1.97                     | 0.46              |
| 2:B:314:MET:HE1  | 2:B:353:CYS:N    | 2.30                     | 0.46              |
| 2:B:480:CYS:O    | 2:B:484:ILE:HG12 | 2.15                     | 0.46              |
| 2:B:737:TRP:CE2  | 2:B:741:ILE:HD11 | 2.50                     | 0.46              |
| 1:C:247:GLU:HB3  | 1:C:291:LEU:HD11 | 1.98                     | 0.46              |
| 1:C:354:ALA:HB2  | 1:C:402:LEU:HD11 | 1.98                     | 0.46              |
| 1:C:554:PHE:O    | 1:C:558:VAL:HG23 | 2.15                     | 0.46              |
| 2:D:154:LEU:HD11 | 2:D:169:LEU:HD22 | 1.96                     | 0.46              |
| 2:D:555:ILE:O    | 2:D:559:LEU:HD13 | 2.15                     | 0.46              |
| 2:D:718:MET:HA   | 2:D:721:THR:OG1  | 2.15                     | 0.46              |
| 1:A:447:HIS:NE2  | 1:A:731:HIS:HB3  | 2.31                     | 0.46              |
| 1:A:453:GLU:HB3  | 1:A:454:PRO:CD   | 2.46                     | 0.46              |
| 1:A:482:MET:CE   | 1:A:585:GLY:HA3  | 2.43                     | 0.46              |
| 1:A:691:TYR:OH   | 2:D:572:GLU:HG3  | 2.16                     | 0.46              |
| 2:B:383:ILE:HD11 | 2:B:445:ASN:ND2  | 2.30                     | 0.46              |
| 1:C:556:TYR:HB2  | 1:C:584:LEU:CD1  | 2.44                     | 0.46              |
| 1:C:559:LEU:HD21 | 1:C:580:PHE:CB   | 2.46                     | 0.46              |
| 2:D:371:LEU:HD11 | 2:D:379:LYS:HD2  | 1.97                     | 0.46              |
| 1:A:424:LEU:HD23 | 1:A:455:ILE:CD1  | 2.45                     | 0.46              |
| 2:B:271:ARG:HA   | 2:B:274:GLN:HG2  | 1.97                     | 0.46              |
| 2:B:326:HIS:CD2  | 2:B:373:PRO:HG3  | 2.50                     | 0.46              |
| 2:B:602:TYR:HE2  | 1:C:620:VAL:HG21 | 1.80                     | 0.46              |
| 1:C:453:GLU:HB3  | 1:C:454:PRO:CD   | 2.46                     | 0.46              |
| 1:C:585:GLY:O    | 1:C:589:ALA:N    | 2.49                     | 0.46              |
| 2:D:271:ARG:HA   | 2:D:274:GLN:HG2  | 1.97                     | 0.46              |
| 2:D:671:LEU:HD13 | 2:D:674:PHE:HD2  | 1.80                     | 0.46              |
| 1:A:629:ALA:O    | 1:A:633:VAL:HG13 | 2.16                     | 0.46              |
| 1:C:677:THR:HA   | 1:C:703:ILE:HD12 | 1.97                     | 0.46              |
| 2:D:149:PHE:CD1  | 2:D:169:LEU:HD13 | 2.51                     | 0.46              |
| 2:D:157:ILE:HG21 | 2:D:166:LEU:HB3  | 1.98                     | 0.46              |
| 2:D:296:ASN:O    | 2:D:298:PRO:HD3  | 2.16                     | 0.46              |
| 1:A:705:LEU:O    | 1:A:708:VAL:HG22 | 2.15                     | 0.46              |
| 1:C:202:LEU:HD23 | 1:C:202:LEU:H    | 1.80                     | 0.46              |
| 1:C:215:ASP:O    | 1:C:219:ARG:HG2  | 2.16                     | 0.46              |
| 1:C:296:ASN:CA   | 1:C:345:MET:HE1  | 2.46                     | 0.46              |
| 1:C:447:HIS:NE2  | 1:C:731:HIS:HB3  | 2.31                     | 0.46              |
| 1:C:573:ALA:HA   | 2:D:691:TYR:OH   | 2.16                     | 0.46              |
| 2:D:498:PRO:HA   | 2:D:499:PRO:HD3  | 1.69                     | 0.46              |
| 2:D:499:PRO:HD2  | 2:D:567:TYR:HE1  | 1.79                     | 0.46              |

*Continued on next page...*

*Continued from previous page...*

| Atom-1           | Atom-2           | Interatomic distance (Å) | Clash overlap (Å) |
|------------------|------------------|--------------------------|-------------------|
| 1:A:325:LEU:HD22 | 1:A:346:TYR:CD1  | 2.51                     | 0.46              |
| 1:A:583:VAL:HG11 | 2:B:698:LEU:HD12 | 1.96                     | 0.46              |
| 1:C:616:ARG:NH2  | 1:C:720:GLU:OE1  | 2.43                     | 0.46              |
| 1:C:629:ALA:O    | 1:C:633:VAL:HG13 | 2.16                     | 0.46              |
| 2:D:315:ARG:HG2  | 2:D:362:LEU:HD23 | 1.96                     | 0.46              |
| 1:A:397:GLU:HA   | 1:A:400:ARG:HD2  | 1.98                     | 0.45              |
| 1:A:492:GLN:OE1  | 1:A:510:ARG:HD2  | 2.17                     | 0.45              |
| 1:A:559:LEU:HD21 | 1:A:580:PHE:CB   | 2.46                     | 0.45              |
| 1:A:697:ILE:HD11 | 2:D:580:PHE:CZ   | 2.51                     | 0.45              |
| 2:B:264:VAL:HG11 | 2:B:312:ALA:HB2  | 1.96                     | 0.45              |
| 2:B:371:LEU:HD11 | 2:B:379:LYS:HD2  | 1.97                     | 0.45              |
| 2:B:555:ILE:O    | 2:B:559:LEU:HD13 | 2.15                     | 0.45              |
| 2:B:671:LEU:HD13 | 2:B:674:PHE:HD2  | 1.80                     | 0.45              |
| 1:C:277:ASP:OD1  | 1:C:278:GLU:N    | 2.49                     | 0.45              |
| 1:C:492:GLN:OE1  | 1:C:510:ARG:HD2  | 2.17                     | 0.45              |
| 1:A:628:TYR:O    | 1:A:632:LEU:HD13 | 2.17                     | 0.45              |
| 1:A:633:VAL:HA   | 1:A:636:LEU:HD23 | 1.99                     | 0.45              |
| 2:B:524:PHE:O    | 2:B:528:ASN:HB2  | 2.16                     | 0.45              |
| 1:C:195:LEU:HB3  | 1:C:196:PRO:HD3  | 1.97                     | 0.45              |
| 2:D:671:LEU:O    | 2:D:671:LEU:HD12 | 2.16                     | 0.45              |
| 2:D:743:ASP:OD1  | 2:D:746:ARG:NH1  | 2.34                     | 0.45              |
| 1:A:509:LEU:O    | 1:A:512:ALA:HB3  | 2.16                     | 0.45              |
| 1:A:597:LYS:HA   | 1:A:733:TRP:CZ3  | 2.52                     | 0.45              |
| 1:A:628:TYR:CD2  | 1:A:702:TYR:HB2  | 2.51                     | 0.45              |
| 2:B:150:ASN:N    | 2:B:153:ILE:HD12 | 2.31                     | 0.45              |
| 2:B:202:LEU:CG   | 2:B:205:GLY:HA2  | 2.33                     | 0.45              |
| 2:B:258:VAL:HA   | 2:B:262:ALA:HB2  | 1.98                     | 0.45              |
| 1:C:752:LEU:HD11 | 1:C:756:PHE:HE2  | 1.81                     | 0.45              |
| 2:D:494:LEU:HD21 | 2:D:575:LEU:CD2  | 2.41                     | 0.45              |
| 1:A:582:LEU:HD23 | 2:B:631:ALA:CA   | 2.46                     | 0.45              |
| 2:B:493:PRO:CB   | 2:B:499:PRO:HB3  | 2.45                     | 0.45              |
| 1:C:325:LEU:HD22 | 1:C:346:TYR:CD1  | 2.51                     | 0.45              |
| 1:C:509:LEU:O    | 1:C:512:ALA:HB3  | 2.16                     | 0.45              |
| 1:C:628:TYR:CD2  | 1:C:702:TYR:HB2  | 2.52                     | 0.45              |
| 2:D:479:LEU:O    | 2:D:483:VAL:HG23 | 2.16                     | 0.45              |
| 2:D:554:PHE:O    | 2:D:558:VAL:HG23 | 2.17                     | 0.45              |
| 1:A:244:ILE:O    | 1:A:248:ARG:HG2  | 2.15                     | 0.45              |
| 1:A:247:GLU:HB3  | 1:A:291:LEU:HD11 | 1.98                     | 0.45              |
| 2:B:492:GLN:NE2  | 2:B:493:PRO:HD2  | 2.32                     | 0.45              |
| 2:B:554:PHE:O    | 2:B:558:VAL:HG23 | 2.17                     | 0.45              |
| 2:B:580:PHE:O    | 2:B:583:VAL:HG22 | 2.17                     | 0.45              |

*Continued on next page...*

*Continued from previous page...*

| Atom-1           | Atom-2           | Interatomic distance (Å) | Clash overlap (Å) |
|------------------|------------------|--------------------------|-------------------|
| 2:B:671:LEU:O    | 2:B:671:LEU:HD12 | 2.16                     | 0.45              |
| 1:A:202:LEU:HD23 | 1:A:202:LEU:H    | 1.80                     | 0.45              |
| 1:A:277:ASP:OD1  | 1:A:278:GLU:N    | 2.49                     | 0.45              |
| 1:A:354:ALA:HB2  | 1:A:402:LEU:HD11 | 1.98                     | 0.45              |
| 1:C:258:VAL:HG22 | 1:C:309:HIS:HE1  | 1.80                     | 0.45              |
| 1:C:527:THR:O    | 1:C:530:LYS:HG2  | 2.16                     | 0.45              |
| 1:C:717:LEU:HD11 | 2:D:715:ILE:CD1  | 2.47                     | 0.45              |
| 2:D:527:THR:HA   | 2:D:530:LYS:HG3  | 1.97                     | 0.45              |
| 2:D:580:PHE:O    | 2:D:583:VAL:HG22 | 2.17                     | 0.45              |
| 1:A:604:ILE:HG13 | 1:A:605:MET:HE2  | 1.99                     | 0.45              |
| 1:C:372:SER:H    | 1:C:375:MET:HE3  | 1.81                     | 0.45              |
| 2:B:439:TYR:HE1  | 2:B:739:THR:HG23 | 1.82                     | 0.45              |
| 2:B:502:TYR:CD1  | 2:B:507:ASP:HB3  | 2.52                     | 0.45              |
| 2:D:381:GLY:HA2  | 2:D:449:MET:HE1  | 1.97                     | 0.45              |
| 2:D:439:TYR:HE1  | 2:D:739:THR:HG23 | 1.82                     | 0.45              |
| 1:A:527:THR:O    | 1:A:530:LYS:HG2  | 2.16                     | 0.45              |
| 2:B:479:LEU:O    | 2:B:483:VAL:HG23 | 2.16                     | 0.45              |
| 1:A:215:ASP:O    | 1:A:219:ARG:HG2  | 2.16                     | 0.44              |
| 1:A:324:VAL:HG11 | 1:A:349:LEU:HD23 | 1.99                     | 0.44              |
| 1:A:616:ARG:NH2  | 1:A:720:GLU:OE1  | 2.43                     | 0.44              |
| 1:C:324:VAL:HG11 | 1:C:349:LEU:HD23 | 1.99                     | 0.44              |
| 1:C:397:GLU:HA   | 1:C:400:ARG:HD2  | 1.98                     | 0.44              |
| 1:C:622:LEU:O    | 1:C:626:ILE:HG12 | 2.18                     | 0.44              |
| 2:D:163:THR:OG1  | 2:D:166:LEU:HD11 | 2.17                     | 0.44              |
| 2:D:566:LEU:HD22 | 2:D:571:ILE:HG21 | 1.99                     | 0.44              |
| 1:A:208:ASP:O    | 1:A:211:PRO:HD2  | 2.17                     | 0.44              |
| 1:A:622:LEU:O    | 1:A:626:ILE:HG12 | 2.18                     | 0.44              |
| 1:A:797:GLU:O    | 1:A:799:PRO:HD3  | 2.18                     | 0.44              |
| 2:B:157:ILE:HG21 | 2:B:166:LEU:HB3  | 1.98                     | 0.44              |
| 1:C:323:THR:H    | 1:C:326:HIS:CD2  | 2.35                     | 0.44              |
| 1:C:579:VAL:HG21 | 2:D:635:LEU:HB2  | 1.99                     | 0.44              |
| 2:D:258:VAL:HA   | 2:D:262:ALA:HB2  | 1.98                     | 0.44              |
| 1:A:264:VAL:HG23 | 1:A:265:HIS:CD2  | 2.53                     | 0.44              |
| 1:A:413:PRO:HD2  | 2:B:282:PHE:CE1  | 2.52                     | 0.44              |
| 2:B:566:LEU:HD22 | 2:B:571:ILE:HG21 | 1.99                     | 0.44              |
| 1:C:633:VAL:HA   | 1:C:636:LEU:HD23 | 1.99                     | 0.44              |
| 1:C:795:ILE:HG22 | 1:C:795:ILE:O    | 2.18                     | 0.44              |
| 2:D:371:LEU:HD11 | 2:D:379:LYS:NZ   | 2.33                     | 0.44              |
| 2:D:492:GLN:NE2  | 2:D:493:PRO:HD2  | 2.32                     | 0.44              |
| 2:D:580:PHE:HA   | 2:D:583:VAL:HG22 | 2.00                     | 0.44              |
| 1:A:207:ASN:HB3  | 1:A:210:ILE:HD13 | 2.00                     | 0.44              |

*Continued on next page...*



*Continued from previous page...*

| Atom-1           | Atom-2           | Interatomic distance (Å) | Clash overlap (Å) |
|------------------|------------------|--------------------------|-------------------|
| 1:A:258:VAL:HA   | 1:A:262:ALA:HB3  | 1.97                     | 0.44              |
| 1:A:452:VAL:HG23 | 1:A:453:GLU:N    | 2.33                     | 0.44              |
| 1:C:208:ASP:O    | 1:C:211:PRO:HD2  | 2.17                     | 0.44              |
| 1:C:597:LYS:HA   | 1:C:733:TRP:CZ3  | 2.52                     | 0.44              |
| 1:A:372:SER:H    | 1:A:375:MET:HE3  | 1.82                     | 0.44              |
| 1:C:173:LEU:HD13 | 1:C:178:LYS:HB2  | 1.99                     | 0.44              |
| 2:D:616:ARG:O    | 2:D:620:VAL:HG22 | 2.17                     | 0.44              |
| 2:D:742:LEU:O    | 2:D:746:ARG:HG3  | 2.18                     | 0.44              |
| 1:A:423:SER:O    | 1:A:433:VAL:HG23 | 2.18                     | 0.44              |
| 1:A:452:VAL:HG23 | 1:A:453:GLU:H    | 1.83                     | 0.44              |
| 1:A:498:PRO:O    | 1:A:500:TYR:N    | 2.43                     | 0.44              |
| 1:A:500:TYR:OH   | 1:A:568:LEU:HA   | 2.18                     | 0.44              |
| 2:B:371:LEU:HD11 | 2:B:379:LYS:NZ   | 2.33                     | 0.44              |
| 2:B:616:ARG:O    | 2:B:620:VAL:HG22 | 2.17                     | 0.44              |
| 1:C:452:VAL:HG23 | 1:C:453:GLU:N    | 2.33                     | 0.44              |
| 1:C:485:PHE:CD2  | 1:C:582:LEU:HD13 | 2.53                     | 0.44              |
| 1:C:500:TYR:OH   | 1:C:568:LEU:HA   | 2.18                     | 0.44              |
| 1:C:797:GLU:O    | 1:C:799:PRO:HD3  | 2.18                     | 0.44              |
| 1:A:424:LEU:HD23 | 1:A:455:ILE:HD11 | 2.00                     | 0.44              |
| 1:A:785:TRP:HZ3  | 2:B:333:ASP:HB2  | 1.79                     | 0.44              |
| 2:B:154:LEU:HD11 | 2:B:169:LEU:CD2  | 2.48                     | 0.44              |
| 2:B:163:THR:OG1  | 2:B:166:LEU:HD11 | 2.17                     | 0.44              |
| 1:A:236:TYR:OH   | 2:D:799:PRO:O    | 2.30                     | 0.44              |
| 1:A:292:ALA:O    | 1:A:297:GLN:HB2  | 2.18                     | 0.44              |
| 1:A:725:VAL:HG21 | 2:B:715:ILE:CG2  | 2.48                     | 0.44              |
| 2:B:193:THR:HG22 | 2:B:194:CYS:N    | 2.32                     | 0.44              |
| 2:D:456:ASN:OD1  | 2:D:460:ARG:NH1  | 2.51                     | 0.44              |
| 2:D:502:TYR:CD1  | 2:D:507:ASP:HB3  | 2.52                     | 0.44              |
| 2:B:472:TYR:CA   | 2:B:475:VAL:HG12 | 2.42                     | 0.43              |
| 2:B:498:PRO:HA   | 2:B:499:PRO:HD3  | 1.69                     | 0.43              |
| 2:B:686:LEU:CD1  | 2:B:688:SER:H    | 2.29                     | 0.43              |
| 1:C:264:VAL:HG23 | 1:C:265:HIS:CD2  | 2.53                     | 0.43              |
| 1:C:350:LEU:HD11 | 1:C:361:ASN:HD21 | 1.83                     | 0.43              |
| 1:C:628:TYR:O    | 1:C:632:LEU:HD13 | 2.17                     | 0.43              |
| 1:A:582:LEU:HD11 | 1:A:586:TRP:HE1  | 1.83                     | 0.43              |
| 2:B:192:LYS:HD3  | 2:B:197:LYS:HE3  | 2.00                     | 0.43              |
| 1:C:610:LEU:HA   | 1:C:614:LEU:HD23 | 2.01                     | 0.43              |
| 1:C:632:LEU:HD11 | 1:C:698:LEU:HB3  | 1.99                     | 0.43              |
| 1:C:764:VAL:CG2  | 1:C:795:ILE:HD13 | 2.48                     | 0.43              |
| 1:A:485:PHE:HE2  | 1:A:582:LEU:HB2  | 1.83                     | 0.43              |
| 1:A:498:PRO:HA   | 1:A:499:PRO:HD3  | 1.86                     | 0.43              |

*Continued on next page...*

*Continued from previous page...*

| Atom-1           | Atom-2           | Interatomic distance (Å) | Clash overlap (Å) |
|------------------|------------------|--------------------------|-------------------|
| 2:B:151:ARG:HG3  | 2:B:155:PHE:CE2  | 2.53                     | 0.43              |
| 1:C:325:LEU:HD12 | 1:C:362:LEU:HB3  | 2.00                     | 0.43              |
| 1:C:616:ARG:NH1  | 1:C:720:GLU:OE2  | 2.51                     | 0.43              |
| 1:A:173:LEU:HD13 | 1:A:178:LYS:HB2  | 1.99                     | 0.43              |
| 1:A:485:PHE:CD2  | 1:A:582:LEU:HD13 | 2.53                     | 0.43              |
| 1:A:526:PHE:O    | 1:A:529:ILE:HG22 | 2.19                     | 0.43              |
| 1:A:603:SER:OG   | 1:A:604:ILE:N    | 2.51                     | 0.43              |
| 1:A:624:PHE:CE1  | 1:A:705:LEU:HD23 | 2.53                     | 0.43              |
| 2:B:797:GLU:HG2  | 2:B:798:ASP:N    | 2.33                     | 0.43              |
| 1:C:292:ALA:O    | 1:C:297:GLN:HB2  | 2.18                     | 0.43              |
| 1:C:485:PHE:HE2  | 1:C:582:LEU:HB2  | 1.84                     | 0.43              |
| 1:C:624:PHE:CE1  | 1:C:705:LEU:HD23 | 2.53                     | 0.43              |
| 1:A:243:HIS:ND1  | 1:A:268:ALA:HB2  | 2.33                     | 0.43              |
| 1:A:325:LEU:HD12 | 1:A:362:LEU:HB3  | 2.00                     | 0.43              |
| 1:A:797:GLU:OE1  | 2:B:200:LEU:HB3  | 2.19                     | 0.43              |
| 2:B:334:ASN:ND2  | 2:B:383:ILE:HD12 | 2.33                     | 0.43              |
| 1:C:207:ASN:HB3  | 1:C:210:ILE:HD13 | 2.00                     | 0.43              |
| 1:C:423:SER:O    | 1:C:433:VAL:HG23 | 2.18                     | 0.43              |
| 1:C:582:LEU:HD11 | 1:C:586:TRP:HE1  | 1.83                     | 0.43              |
| 2:D:258:VAL:HA   | 2:D:262:ALA:HB3  | 2.00                     | 0.43              |
| 1:A:210:ILE:O    | 1:A:214:LEU:HD23 | 2.19                     | 0.43              |
| 1:A:764:VAL:CG2  | 1:A:795:ILE:HD13 | 2.48                     | 0.43              |
| 1:A:795:ILE:O    | 1:A:795:ILE:HG22 | 2.17                     | 0.43              |
| 2:B:502:TYR:CB   | 2:B:507:ASP:HB3  | 2.48                     | 0.43              |
| 1:C:452:VAL:HG23 | 1:C:453:GLU:H    | 1.82                     | 0.43              |
| 2:D:154:LEU:HD11 | 2:D:169:LEU:CD2  | 2.48                     | 0.43              |
| 2:D:331:ILE:H    | 2:D:331:ILE:HG13 | 1.70                     | 0.43              |
| 2:D:366:LEU:CD2  | 2:D:372:SER:HB3  | 2.49                     | 0.43              |
| 2:B:424:LEU:HD23 | 2:B:455:ILE:CD1  | 2.48                     | 0.43              |
| 2:B:510:ARG:O    | 2:B:514:GLU:HG3  | 2.18                     | 0.43              |
| 2:B:580:PHE:HA   | 2:B:583:VAL:HG22 | 2.00                     | 0.43              |
| 2:B:583:VAL:O    | 2:B:587:MET:HG3  | 2.19                     | 0.43              |
| 2:D:192:LYS:HD3  | 2:D:197:LYS:HE3  | 2.00                     | 0.43              |
| 2:D:334:ASN:ND2  | 2:D:383:ILE:HD12 | 2.33                     | 0.43              |
| 1:A:447:HIS:CE1  | 1:A:731:HIS:HB3  | 2.54                     | 0.43              |
| 1:A:585:GLY:O    | 1:A:589:ALA:N    | 2.49                     | 0.43              |
| 2:B:252:HIS:O    | 2:B:256:LEU:HD13 | 2.19                     | 0.43              |
| 2:B:608:LYS:HZ3  | 2:B:725:VAL:HG11 | 1.82                     | 0.43              |
| 2:B:743:ASP:OD1  | 2:B:746:ARG:NH1  | 2.34                     | 0.43              |
| 2:B:752:LEU:HD11 | 2:B:756:PHE:HE2  | 1.83                     | 0.43              |
| 1:C:233:ASP:OD2  | 1:C:235:TYR:HB3  | 2.19                     | 0.43              |

*Continued on next page...*

*Continued from previous page...*

| Atom-1           | Atom-2           | Interatomic distance (Å) | Clash overlap (Å) |
|------------------|------------------|--------------------------|-------------------|
| 1:C:243:HIS:ND1  | 1:C:268:ALA:HB2  | 2.33                     | 0.43              |
| 1:C:594:ARG:NH2  | 1:C:736:GLN:HG2  | 2.34                     | 0.43              |
| 2:D:752:LEU:HD11 | 2:D:756:PHE:HE2  | 1.83                     | 0.43              |
| 2:D:760:GLU:O    | 2:D:762:VAL:HG23 | 2.19                     | 0.43              |
| 1:A:243:HIS:CE1  | 1:A:268:ALA:HB2  | 2.54                     | 0.43              |
| 1:A:632:LEU:HD11 | 1:A:698:LEU:HB3  | 1.99                     | 0.43              |
| 2:B:307:ASN:OD1  | 2:B:311:LYS:HB3  | 2.19                     | 0.43              |
| 2:B:672:ASP:HB3  | 2:B:685:MET:CE   | 2.49                     | 0.43              |
| 2:B:742:LEU:O    | 2:B:746:ARG:HG3  | 2.18                     | 0.43              |
| 1:C:243:HIS:CE1  | 1:C:268:ALA:HB2  | 2.54                     | 0.43              |
| 1:C:526:PHE:O    | 1:C:529:ILE:HG22 | 2.19                     | 0.43              |
| 1:C:558:VAL:O    | 1:C:562:VAL:HG23 | 2.19                     | 0.43              |
| 1:C:603:SER:OG   | 1:C:604:ILE:N    | 2.51                     | 0.43              |
| 2:D:493:PRO:CB   | 2:D:499:PRO:HB3  | 2.45                     | 0.43              |
| 2:D:583:VAL:O    | 2:D:587:MET:HG3  | 2.19                     | 0.43              |
| 1:A:233:ASP:OD2  | 1:A:235:TYR:HB3  | 2.19                     | 0.43              |
| 1:A:414:VAL:HG13 | 1:A:414:VAL:O    | 2.19                     | 0.43              |
| 1:A:661:ARG:CG   | 1:A:687:SER:HB2  | 2.35                     | 0.43              |
| 2:B:456:ASN:OD1  | 2:B:460:ARG:NH1  | 2.51                     | 0.43              |
| 2:D:151:ARG:HG3  | 2:D:155:PHE:CE2  | 2.53                     | 0.43              |
| 2:D:426:THR:HG23 | 2:D:426:THR:O    | 2.19                     | 0.43              |
| 2:D:510:ARG:O    | 2:D:514:GLU:HG3  | 2.18                     | 0.43              |
| 1:A:321:GLY:HA3  | 1:A:367:ASN:HA   | 2.00                     | 0.42              |
| 1:A:411:TYR:OH   | 2:B:291:LEU:HD11 | 2.18                     | 0.42              |
| 1:C:215:ASP:O    | 1:C:218:GLU:HG2  | 2.19                     | 0.42              |
| 2:D:298:PRO:HG3  | 2:D:345:MET:CE   | 2.49                     | 0.42              |
| 2:D:387:GLN:O    | 2:D:391:ARG:HG2  | 2.19                     | 0.42              |
| 2:D:502:TYR:CB   | 2:D:507:ASP:HB3  | 2.48                     | 0.42              |
| 2:D:672:ASP:HB3  | 2:D:685:MET:CE   | 2.49                     | 0.42              |
| 2:D:797:GLU:HG2  | 2:D:798:ASP:N    | 2.33                     | 0.42              |
| 1:A:198:ALA:HB1  | 1:A:210:ILE:CD1  | 2.49                     | 0.42              |
| 1:A:215:ASP:O    | 1:A:218:GLU:HG2  | 2.19                     | 0.42              |
| 1:A:558:VAL:O    | 1:A:562:VAL:HG23 | 2.19                     | 0.42              |
| 1:A:590:LEU:HD21 | 1:A:602:TYR:CZ   | 2.54                     | 0.42              |
| 1:A:594:ARG:NH2  | 1:A:736:GLN:HG2  | 2.34                     | 0.42              |
| 2:B:342:VAL:CG1  | 2:B:385:ILE:HD12 | 2.49                     | 0.42              |
| 1:C:414:VAL:HG13 | 1:C:414:VAL:O    | 2.19                     | 0.42              |
| 1:C:424:LEU:HD23 | 1:C:455:ILE:HD11 | 2.00                     | 0.42              |
| 1:A:610:LEU:HA   | 1:A:614:LEU:HD23 | 2.01                     | 0.42              |
| 2:B:326:HIS:HE2  | 2:B:373:PRO:HD3  | 1.84                     | 0.42              |
| 2:B:494:LEU:HD21 | 2:B:575:LEU:CD2  | 2.41                     | 0.42              |

*Continued on next page...*

*Continued from previous page...*

| Atom-1           | Atom-2           | Interatomic distance (Å) | Clash overlap (Å) |
|------------------|------------------|--------------------------|-------------------|
| 2:B:586:TRP:O    | 1:C:623:LEU:HD12 | 2.20                     | 0.42              |
| 2:B:760:GLU:O    | 2:B:762:VAL:HG23 | 2.19                     | 0.42              |
| 1:C:198:ALA:HB1  | 1:C:210:ILE:CD1  | 2.49                     | 0.42              |
| 1:C:253:TYR:O    | 1:C:257:LEU:HD13 | 2.20                     | 0.42              |
| 1:C:447:HIS:CE1  | 1:C:731:HIS:HB3  | 2.54                     | 0.42              |
| 1:C:590:LEU:HD21 | 1:C:602:TYR:CZ   | 2.54                     | 0.42              |
| 2:D:424:LEU:HD23 | 2:D:455:ILE:CD1  | 2.48                     | 0.42              |
| 2:D:474:ASN:O    | 2:D:478:TYR:N    | 2.46                     | 0.42              |
| 1:A:559:LEU:HD21 | 1:A:580:PHE:HB2  | 2.02                     | 0.42              |
| 1:A:719:GLY:N    | 2:D:722:VAL:HG22 | 2.33                     | 0.42              |
| 2:B:556:TYR:O    | 2:B:560:VAL:HG23 | 2.20                     | 0.42              |
| 2:B:690:LYS:O    | 2:B:692:PRO:HD3  | 2.19                     | 0.42              |
| 1:C:436:ILE:HG23 | 1:C:440:ASN:OD1  | 2.19                     | 0.42              |
| 1:C:511:LEU:O    | 1:C:514:GLU:HB2  | 2.19                     | 0.42              |
| 1:C:563:SER:HB3  | 1:C:578:MET:SD   | 2.59                     | 0.42              |
| 1:C:590:LEU:HD21 | 1:C:602:TYR:CE2  | 2.54                     | 0.42              |
| 2:D:192:LYS:CD   | 2:D:197:LYS:HE3  | 2.49                     | 0.42              |
| 1:A:253:TYR:O    | 1:A:257:LEU:HD13 | 2.20                     | 0.42              |
| 2:B:282:PHE:CE2  | 2:B:284:PHE:HB3  | 2.54                     | 0.42              |
| 2:B:324:VAL:O    | 2:B:328:LEU:HD13 | 2.20                     | 0.42              |
| 2:B:527:THR:CG2  | 2:B:530:LYS:HD2  | 2.45                     | 0.42              |
| 2:B:545:ILE:O    | 2:B:545:ILE:HG22 | 2.20                     | 0.42              |
| 2:B:621:TYR:HE1  | 2:B:706:THR:HG22 | 1.84                     | 0.42              |
| 1:C:289:LEU:HD21 | 1:C:314:MET:HG2  | 2.02                     | 0.42              |
| 1:C:530:LYS:HA   | 1:C:533:PHE:CB   | 2.49                     | 0.42              |
| 1:C:609:ILE:HG13 | 1:C:725:VAL:HG11 | 2.02                     | 0.42              |
| 2:D:264:VAL:O    | 2:D:265:HIS:HB2  | 2.20                     | 0.42              |
| 1:A:273:PHE:HE1  | 2:D:411:TYR:CZ   | 2.36                     | 0.42              |
| 1:A:616:ARG:NH1  | 1:A:720:GLU:OE2  | 2.51                     | 0.42              |
| 2:B:258:VAL:HA   | 2:B:262:ALA:HB3  | 2.00                     | 0.42              |
| 2:B:366:LEU:CD2  | 2:B:372:SER:HB3  | 2.49                     | 0.42              |
| 1:C:321:GLY:HA3  | 1:C:367:ASN:HA   | 2.00                     | 0.42              |
| 1:C:498:PRO:HA   | 1:C:499:PRO:HD3  | 1.86                     | 0.42              |
| 2:D:282:PHE:CE2  | 2:D:284:PHE:HB3  | 2.54                     | 0.42              |
| 2:D:307:ASN:OD1  | 2:D:311:LYS:HB3  | 2.19                     | 0.42              |
| 2:D:317:GLN:HE21 | 2:D:365:VAL:CG1  | 2.32                     | 0.42              |
| 2:D:472:TYR:CA   | 2:D:475:VAL:HG12 | 2.42                     | 0.42              |
| 2:D:749:PRO:O    | 2:D:753:ARG:HG3  | 2.20                     | 0.42              |
| 1:A:530:LYS:HA   | 1:A:533:PHE:CB   | 2.49                     | 0.42              |
| 2:B:192:LYS:CD   | 2:B:197:LYS:HE3  | 2.49                     | 0.42              |
| 2:B:298:PRO:HG3  | 2:B:345:MET:CE   | 2.49                     | 0.42              |

*Continued on next page...*

*Continued from previous page...*

| Atom-1           | Atom-2           | Interatomic distance (Å) | Clash overlap (Å) |
|------------------|------------------|--------------------------|-------------------|
| 1:C:286:GLU:HB2  | 1:C:318:ASP:HB2  | 2.01                     | 0.42              |
| 1:C:469:VAL:O    | 1:C:473:ILE:HD12 | 2.20                     | 0.42              |
| 1:C:671:LEU:O    | 1:C:671:LEU:HD12 | 2.20                     | 0.42              |
| 2:D:483:VAL:O    | 2:D:487:LEU:HD13 | 2.20                     | 0.42              |
| 1:A:150:ASN:H    | 1:A:153:ILE:HG22 | 1.85                     | 0.42              |
| 1:A:255:GLU:HA   | 1:A:258:VAL:HG12 | 2.01                     | 0.42              |
| 1:A:350:LEU:HD11 | 1:A:361:ASN:HD21 | 1.83                     | 0.42              |
| 1:A:436:ILE:HG23 | 1:A:440:ASN:OD1  | 2.19                     | 0.42              |
| 1:A:469:VAL:O    | 1:A:473:ILE:HD12 | 2.20                     | 0.42              |
| 1:A:609:ILE:HG13 | 1:A:725:VAL:HG11 | 2.02                     | 0.42              |
| 1:C:258:VAL:HG22 | 1:C:309:HIS:CE1  | 2.55                     | 0.42              |
| 1:C:559:LEU:HD21 | 1:C:580:PHE:HB2  | 2.02                     | 0.42              |
| 1:A:286:GLU:HB2  | 1:A:318:ASP:HB2  | 2.01                     | 0.42              |
| 1:A:511:LEU:O    | 1:A:514:GLU:HB2  | 2.19                     | 0.42              |
| 1:A:559:LEU:CD1  | 1:A:577:VAL:HG13 | 2.50                     | 0.42              |
| 1:A:718:MET:HG2  | 1:C:718:MET:HG2  | 2.02                     | 0.42              |
| 2:B:305:THR:HG1  | 2:B:306:GLU:CD   | 2.20                     | 0.42              |
| 2:B:387:GLN:O    | 2:B:391:ARG:HG2  | 2.19                     | 0.42              |
| 2:B:485:PHE:CD2  | 2:B:582:LEU:HD13 | 2.55                     | 0.42              |
| 2:B:524:PHE:HD1  | 3:B:902:POV:H13B | 1.85                     | 0.42              |
| 1:C:255:GLU:HA   | 1:C:258:VAL:HG12 | 2.02                     | 0.42              |
| 2:D:342:VAL:CG1  | 2:D:385:ILE:HD12 | 2.49                     | 0.42              |
| 2:D:485:PHE:CD2  | 2:D:582:LEU:HD13 | 2.55                     | 0.42              |
| 2:D:527:THR:HG22 | 2:D:530:LYS:CD   | 2.43                     | 0.42              |
| 1:A:296:ASN:CA   | 1:A:345:MET:HE1  | 2.49                     | 0.42              |
| 1:A:671:LEU:HD12 | 1:A:671:LEU:O    | 2.20                     | 0.42              |
| 1:A:678:ILE:HG13 | 1:A:680:MET:SD   | 2.60                     | 0.42              |
| 1:A:725:VAL:O    | 1:A:729:SER:HB3  | 2.20                     | 0.42              |
| 2:B:426:THR:HG23 | 2:B:426:THR:O    | 2.19                     | 0.42              |
| 1:C:374:LEU:HD13 | 1:C:389:ILE:CG2  | 2.50                     | 0.42              |
| 2:D:252:HIS:O    | 2:D:256:LEU:HD13 | 2.19                     | 0.42              |
| 2:D:326:HIS:HE2  | 2:D:373:PRO:HD3  | 1.84                     | 0.42              |
| 2:D:519:PHE:O    | 2:D:523:LEU:HG   | 2.20                     | 0.42              |
| 2:D:608:LYS:HZ3  | 2:D:725:VAL:HG11 | 1.85                     | 0.42              |
| 1:A:374:LEU:HD13 | 1:A:389:ILE:CG2  | 2.50                     | 0.41              |
| 1:A:590:LEU:HD21 | 1:A:602:TYR:CE2  | 2.54                     | 0.41              |
| 2:B:317:GLN:HE21 | 2:B:365:VAL:CG1  | 2.32                     | 0.41              |
| 2:B:352:LYS:O    | 2:B:356:LEU:HD13 | 2.20                     | 0.41              |
| 2:B:483:VAL:O    | 2:B:487:LEU:HD13 | 2.20                     | 0.41              |
| 2:B:718:MET:HA   | 2:B:721:THR:HG1  | 1.85                     | 0.41              |
| 1:C:425:ASP:OD2  | 1:C:462:LYS:NZ   | 2.38                     | 0.41              |

*Continued on next page...*



*Continued from previous page...*

| Atom-1           | Atom-2           | Interatomic distance (Å) | Clash overlap (Å) |
|------------------|------------------|--------------------------|-------------------|
| 1:C:596:LEU:O    | 1:C:597:LYS:HB2  | 2.20                     | 0.41              |
| 2:D:324:VAL:O    | 2:D:328:LEU:HD13 | 2.20                     | 0.41              |
| 1:A:276:LYS:HG3  | 1:A:276:LYS:O    | 2.20                     | 0.41              |
| 1:A:669:PHE:HA   | 1:A:672:ASP:HB2  | 2.02                     | 0.41              |
| 2:B:305:THR:O    | 2:B:311:LYS:HD3  | 2.20                     | 0.41              |
| 1:C:443:ILE:HG22 | 1:C:449:MET:CE   | 2.51                     | 0.41              |
| 1:C:445:ASN:O    | 1:C:449:MET:HG3  | 2.20                     | 0.41              |
| 2:D:556:TYR:O    | 2:D:560:VAL:HG23 | 2.20                     | 0.41              |
| 1:A:203:SER:OG   | 1:A:204:ASN:N    | 2.54                     | 0.41              |
| 1:A:443:ILE:HG22 | 1:A:449:MET:CE   | 2.51                     | 0.41              |
| 1:A:445:ASN:O    | 1:A:449:MET:HG3  | 2.20                     | 0.41              |
| 1:A:563:SER:HB3  | 1:A:578:MET:SD   | 2.59                     | 0.41              |
| 1:C:210:ILE:O    | 1:C:214:LEU:HD23 | 2.19                     | 0.41              |
| 2:D:553:TYR:OH   | 2:D:588:ASN:O    | 2.28                     | 0.41              |
| 2:D:621:TYR:HE1  | 2:D:706:THR:HG22 | 1.84                     | 0.41              |
| 2:D:690:LYS:O    | 2:D:692:PRO:HD3  | 2.19                     | 0.41              |
| 1:A:347:ASP:CG   | 1:A:388:HIS:HE2  | 2.24                     | 0.41              |
| 1:A:516:ILE:O    | 1:A:520:THR:HG23 | 2.20                     | 0.41              |
| 1:A:601:THR:HG21 | 1:A:605:MET:HB2  | 2.03                     | 0.41              |
| 1:A:760:GLU:O    | 1:A:762:VAL:HG23 | 2.20                     | 0.41              |
| 2:B:264:VAL:O    | 2:B:265:HIS:HB2  | 2.20                     | 0.41              |
| 1:C:258:VAL:HG13 | 1:C:309:HIS:HE1  | 1.85                     | 0.41              |
| 1:C:347:ASP:CG   | 1:C:388:HIS:HE2  | 2.24                     | 0.41              |
| 1:C:559:LEU:CD1  | 1:C:577:VAL:HG13 | 2.50                     | 0.41              |
| 2:D:429:GLU:O    | 2:D:430:GLU:HB2  | 2.20                     | 0.41              |
| 1:A:722:VAL:HG12 | 2:B:715:ILE:HG23 | 2.02                     | 0.41              |
| 2:B:273:PHE:CD1  | 2:B:284:PHE:HE1  | 2.38                     | 0.41              |
| 1:C:265:HIS:NE2  | 1:C:312:ALA:HA   | 2.36                     | 0.41              |
| 1:C:609:ILE:CG1  | 1:C:725:VAL:HG11 | 2.51                     | 0.41              |
| 1:C:678:ILE:HG13 | 1:C:680:MET:SD   | 2.60                     | 0.41              |
| 1:C:694:VAL:O    | 1:C:697:ILE:HG13 | 2.21                     | 0.41              |
| 2:D:518:LEU:HD23 | 2:D:564:ALA:HB2  | 2.01                     | 0.41              |
| 2:D:530:LYS:HD3  | 3:D:902:POV:H38A | 2.02                     | 0.41              |
| 2:D:545:ILE:HG22 | 2:D:545:ILE:O    | 2.20                     | 0.41              |
| 1:A:314:MET:HE1  | 1:A:353:CYS:N    | 2.36                     | 0.41              |
| 1:A:497:THR:OG1  | 1:A:498:PRO:HD2  | 2.21                     | 0.41              |
| 2:B:383:ILE:HD12 | 2:B:383:ILE:H    | 1.86                     | 0.41              |
| 2:B:518:LEU:HD13 | 2:B:518:LEU:O    | 2.21                     | 0.41              |
| 1:C:246:ILE:HB   | 1:C:291:LEU:HD12 | 2.03                     | 0.41              |
| 1:C:625:MET:HG2  | 1:C:702:TYR:OH   | 2.21                     | 0.41              |
| 2:D:284:PHE:CE2  | 2:D:291:LEU:HB2  | 2.56                     | 0.41              |

*Continued on next page...*

*Continued from previous page...*

| Atom-1           | Atom-2           | Interatomic distance (Å) | Clash overlap (Å) |
|------------------|------------------|--------------------------|-------------------|
| 1:A:258:VAL:HG22 | 1:A:309:HIS:CE1  | 2.55                     | 0.41              |
| 1:A:676:LEU:CD2  | 1:A:699:LEU:HD21 | 2.51                     | 0.41              |
| 1:A:788:TRP:CZ2  | 2:B:296:ASN:HB2  | 2.56                     | 0.41              |
| 2:B:346:TYR:CE2  | 2:B:389:ILE:HG12 | 2.56                     | 0.41              |
| 2:B:452:VAL:HG23 | 2:B:453:GLU:N    | 2.34                     | 0.41              |
| 2:B:518:LEU:HD23 | 2:B:564:ALA:HB2  | 2.01                     | 0.41              |
| 2:B:619:LEU:O    | 2:B:623:LEU:HD23 | 2.21                     | 0.41              |
| 1:C:276:LYS:HG3  | 1:C:276:LYS:O    | 2.20                     | 0.41              |
| 1:C:447:HIS:CD2  | 1:C:731:HIS:HB3  | 2.56                     | 0.41              |
| 1:C:669:PHE:HA   | 1:C:672:ASP:HB2  | 2.02                     | 0.41              |
| 1:C:676:LEU:CD2  | 1:C:699:LEU:HD21 | 2.51                     | 0.41              |
| 2:D:352:LYS:O    | 2:D:356:LEU:HD13 | 2.20                     | 0.41              |
| 2:D:518:LEU:HD13 | 2:D:518:LEU:O    | 2.21                     | 0.41              |
| 2:D:686:LEU:CD1  | 2:D:688:SER:H    | 2.29                     | 0.41              |
| 1:A:224:ARG:NE   | 1:A:261:GLY:HA3  | 2.36                     | 0.41              |
| 1:A:274:GLN:C    | 1:A:283:TYR:HB2  | 2.41                     | 0.41              |
| 1:A:430:GLU:HG2  | 1:A:431:ALA:O    | 2.21                     | 0.41              |
| 1:A:628:TYR:HD2  | 1:A:702:TYR:CD1  | 2.39                     | 0.41              |
| 2:B:297:GLN:OE1  | 2:B:300:ILE:HD12 | 2.21                     | 0.41              |
| 2:B:429:GLU:O    | 2:B:430:GLU:HB2  | 2.20                     | 0.41              |
| 1:C:173:LEU:HD11 | 1:C:185:PHE:CE2  | 2.56                     | 0.41              |
| 1:C:502:TYR:HE2  | 1:C:511:LEU:HB2  | 1.86                     | 0.41              |
| 1:C:725:VAL:O    | 1:C:729:SER:HB3  | 2.20                     | 0.41              |
| 1:C:787:HIS:HD2  | 1:C:790:GLN:HG2  | 1.86                     | 0.41              |
| 2:D:273:PHE:CD1  | 2:D:284:PHE:HE1  | 2.38                     | 0.41              |
| 1:A:265:HIS:NE2  | 1:A:312:ALA:HA   | 2.36                     | 0.41              |
| 1:A:289:LEU:HD21 | 1:A:314:MET:HG2  | 2.01                     | 0.41              |
| 1:A:383:ILE:HD11 | 1:A:445:ASN:CG   | 2.41                     | 0.41              |
| 1:A:596:LEU:O    | 1:A:597:LYS:HB2  | 2.20                     | 0.41              |
| 2:B:749:PRO:O    | 2:B:753:ARG:HG3  | 2.20                     | 0.41              |
| 1:C:332:ALA:O    | 1:C:382:LYS:HD2  | 2.21                     | 0.41              |
| 1:C:391:ARG:HB2  | 1:C:405:LYS:HD2  | 2.03                     | 0.41              |
| 1:C:584:LEU:HA   | 1:C:587:MET:CE   | 2.50                     | 0.41              |
| 1:C:608:LYS:HD3  | 1:C:724:GLN:OE1  | 2.21                     | 0.41              |
| 1:C:628:TYR:HD2  | 1:C:702:TYR:CD1  | 2.39                     | 0.41              |
| 2:D:720:GLU:OE2  | 2:D:721:THR:HG23 | 2.21                     | 0.41              |
| 1:A:190:THR:HG22 | 1:A:233:ASP:HB2  | 2.03                     | 0.41              |
| 1:A:210:ILE:H    | 1:A:210:ILE:HD12 | 1.86                     | 0.41              |
| 1:A:246:ILE:HB   | 1:A:291:LEU:HD12 | 2.03                     | 0.41              |
| 1:A:484:ILE:O    | 1:A:488:THR:HG23 | 2.21                     | 0.41              |
| 1:C:500:TYR:HB2  | 1:C:501:PRO:HD3  | 2.02                     | 0.41              |

*Continued on next page...*

*Continued from previous page...*

| Atom-1           | Atom-2           | Interatomic distance (Å) | Clash overlap (Å) |
|------------------|------------------|--------------------------|-------------------|
| 1:C:760:GLU:O    | 1:C:762:VAL:HG23 | 2.20                     | 0.41              |
| 2:D:305:THR:O    | 2:D:311:LYS:HD3  | 2.21                     | 0.41              |
| 1:A:625:MET:HG2  | 1:A:702:TYR:OH   | 2.21                     | 0.40              |
| 1:A:635:LEU:HD23 | 2:D:575:LEU:CD2  | 2.51                     | 0.40              |
| 2:B:519:PHE:O    | 2:B:523:LEU:HG   | 2.20                     | 0.40              |
| 1:C:274:GLN:C    | 1:C:283:TYR:HB2  | 2.41                     | 0.40              |
| 1:C:516:ILE:O    | 1:C:520:THR:HG23 | 2.20                     | 0.40              |
| 2:D:346:TYR:CE2  | 2:D:389:ILE:HG12 | 2.56                     | 0.40              |
| 2:D:619:LEU:O    | 2:D:623:LEU:HD23 | 2.21                     | 0.40              |
| 1:A:694:VAL:O    | 1:A:697:ILE:HG13 | 2.20                     | 0.40              |
| 2:B:331:ILE:H    | 2:B:331:ILE:HG13 | 1.70                     | 0.40              |
| 2:B:381:GLY:HA2  | 2:B:449:MET:HE1  | 2.02                     | 0.40              |
| 2:B:570:GLY:H    | 2:B:571:ILE:HD12 | 1.86                     | 0.40              |
| 2:B:785:TRP:HB2  | 1:C:337:GLU:HG2  | 2.02                     | 0.40              |
| 1:C:383:ILE:HD11 | 1:C:445:ASN:CG   | 2.42                     | 0.40              |
| 1:C:497:THR:OG1  | 1:C:498:PRO:HD2  | 2.21                     | 0.40              |
| 1:A:260:GLN:O    | 1:A:262:ALA:N    | 2.53                     | 0.40              |
| 1:A:720:GLU:O    | 1:A:722:VAL:N    | 2.54                     | 0.40              |
| 2:B:284:PHE:CE2  | 2:B:291:LEU:HB2  | 2.56                     | 0.40              |
| 2:D:170:LEU:HD21 | 2:D:219:ARG:HG3  | 2.03                     | 0.40              |
| 2:D:443:ILE:HA   | 2:D:446:ARG:HG3  | 2.03                     | 0.40              |
| 2:D:694:VAL:HA   | 2:D:697:ILE:HG12 | 2.04                     | 0.40              |
| 1:A:366:LEU:CD2  | 1:A:372:SER:HB3  | 2.52                     | 0.40              |
| 1:A:488:THR:HG21 | 1:A:513:GLY:HA3  | 2.03                     | 0.40              |
| 2:B:271:ARG:HA   | 2:B:274:GLN:CG   | 2.52                     | 0.40              |
| 2:B:463:TRP:O    | 2:B:468:ALA:N    | 2.50                     | 0.40              |
| 2:B:797:GLU:O    | 2:B:799:PRO:HD3  | 2.21                     | 0.40              |
| 1:C:210:ILE:HD12 | 1:C:210:ILE:H    | 1.86                     | 0.40              |
| 1:C:224:ARG:NE   | 1:C:261:GLY:HA3  | 2.36                     | 0.40              |
| 1:C:484:ILE:O    | 1:C:488:THR:HG23 | 2.21                     | 0.40              |
| 2:D:366:LEU:HD23 | 2:D:372:SER:HB3  | 2.04                     | 0.40              |
| 2:D:718:MET:HA   | 2:D:721:THR:HG1  | 1.86                     | 0.40              |
| 2:D:797:GLU:O    | 2:D:799:PRO:HD3  | 2.21                     | 0.40              |
| 1:A:173:LEU:HD11 | 1:A:185:PHE:CE2  | 2.56                     | 0.40              |
| 1:A:193:THR:HG22 | 1:A:194:CYS:N    | 2.32                     | 0.40              |
| 1:A:609:ILE:CG1  | 1:A:725:VAL:HG11 | 2.51                     | 0.40              |
| 1:A:720:GLU:HG2  | 1:A:721:THR:H    | 1.86                     | 0.40              |
| 1:A:725:VAL:HG21 | 2:B:715:ILE:HG22 | 2.02                     | 0.40              |
| 2:B:491:TYR:O    | 2:B:510:ARG:HD3  | 2.22                     | 0.40              |
| 2:B:745:GLU:HG2  | 2:B:753:ARG:NE   | 2.36                     | 0.40              |
| 1:C:150:ASN:H    | 1:C:153:ILE:HG22 | 1.85                     | 0.40              |

*Continued on next page...*



Continued from previous page...

| Atom-1           | Atom-2           | Interatomic distance (Å) | Clash overlap (Å) |
|------------------|------------------|--------------------------|-------------------|
| 1:C:168:GLY:C    | 1:C:171:PRO:HD2  | 2.42                     | 0.40              |
| 1:C:484:ILE:HG21 | 1:C:516:ILE:HD12 | 2.04                     | 0.40              |
| 1:C:506:VAL:O    | 1:C:509:LEU:HB2  | 2.22                     | 0.40              |

There are no symmetry-related clashes.

## 5.3 Torsion angles [i](#)

### 5.3.1 Protein backbone [i](#)

In the following table, the Percentiles column shows the percent Ramachandran outliers of the chain as a percentile score with respect to all PDB entries followed by that with respect to all EM entries.

The Analysed column shows the number of residues for which the backbone conformation was analysed, and the total number of residues.

| Mol | Chain | Analysed        | Favoured   | Allowed   | Outliers | Percentiles |    |
|-----|-------|-----------------|------------|-----------|----------|-------------|----|
| 1   | A     | 613/619 (99%)   | 532 (87%)  | 76 (12%)  | 5 (1%)   | 19          | 19 |
| 1   | C     | 613/619 (99%)   | 532 (87%)  | 76 (12%)  | 5 (1%)   | 19          | 19 |
| 2   | B     | 632/636 (99%)   | 539 (85%)  | 88 (14%)  | 5 (1%)   | 19          | 19 |
| 2   | D     | 632/636 (99%)   | 539 (85%)  | 88 (14%)  | 5 (1%)   | 19          | 19 |
| All | All   | 2490/2510 (99%) | 2142 (86%) | 328 (13%) | 20 (1%)  | 24          | 19 |

All (20) Ramachandran outliers are listed below:

| Mol | Chain | Res | Type |
|-----|-------|-----|------|
| 2   | B     | 725 | VAL  |
| 2   | D     | 725 | VAL  |
| 1   | A     | 602 | TYR  |
| 1   | A     | 721 | THR  |
| 2   | B     | 690 | LYS  |
| 1   | C     | 602 | TYR  |
| 1   | C     | 721 | THR  |
| 2   | D     | 690 | LYS  |
| 2   | B     | 722 | VAL  |
| 2   | D     | 722 | VAL  |
| 1   | A     | 444 | GLU  |
| 2   | B     | 453 | GLU  |

Continued on next page...

*Continued from previous page...*

| Mol | Chain | Res | Type |
|-----|-------|-----|------|
| 1   | C     | 444 | GLU  |
| 2   | D     | 453 | GLU  |
| 1   | A     | 285 | GLY  |
| 1   | C     | 285 | GLY  |
| 2   | B     | 452 | VAL  |
| 2   | D     | 452 | VAL  |
| 1   | A     | 454 | PRO  |
| 1   | C     | 454 | PRO  |

### 5.3.2 Protein sidechains ⓘ

In the following table, the Percentiles column shows the percent sidechain outliers of the chain as a percentile score with respect to all PDB entries followed by that with respect to all EM entries.

The Analysed column shows the number of residues for which the sidechain conformation was analysed, and the total number of residues.

| Mol | Chain | Analysed         | Rotameric  | Outliers | Percentiles |    |
|-----|-------|------------------|------------|----------|-------------|----|
| 1   | A     | 545/545 (100%)   | 539 (99%)  | 6 (1%)   | 73          | 73 |
| 1   | C     | 545/545 (100%)   | 539 (99%)  | 6 (1%)   | 73          | 73 |
| 2   | B     | 560/560 (100%)   | 551 (98%)  | 9 (2%)   | 62          | 62 |
| 2   | D     | 560/560 (100%)   | 551 (98%)  | 9 (2%)   | 62          | 62 |
| All | All   | 2210/2210 (100%) | 2180 (99%) | 30 (1%)  | 68          | 67 |

All (30) residues with a non-rotameric sidechain are listed below:

| Mol | Chain | Res | Type |
|-----|-------|-----|------|
| 1   | A     | 207 | ASN  |
| 1   | A     | 338 | ASN  |
| 1   | A     | 361 | ASN  |
| 1   | A     | 588 | ASN  |
| 1   | A     | 637 | ASN  |
| 1   | A     | 784 | ASN  |
| 2   | B     | 204 | ASN  |
| 2   | B     | 207 | ASN  |
| 2   | B     | 228 | ASN  |
| 2   | B     | 271 | ARG  |
| 2   | B     | 338 | ASN  |
| 2   | B     | 528 | ASN  |
| 2   | B     | 534 | MET  |

*Continued on next page...*

*Continued from previous page...*

| Mol | Chain | Res | Type |
|-----|-------|-----|------|
| 2   | B     | 541 | ASN  |
| 2   | B     | 784 | ASN  |
| 1   | C     | 207 | ASN  |
| 1   | C     | 338 | ASN  |
| 1   | C     | 361 | ASN  |
| 1   | C     | 588 | ASN  |
| 1   | C     | 637 | ASN  |
| 1   | C     | 784 | ASN  |
| 2   | D     | 204 | ASN  |
| 2   | D     | 207 | ASN  |
| 2   | D     | 228 | ASN  |
| 2   | D     | 271 | ARG  |
| 2   | D     | 338 | ASN  |
| 2   | D     | 528 | ASN  |
| 2   | D     | 534 | MET  |
| 2   | D     | 541 | ASN  |
| 2   | D     | 784 | ASN  |

Sometimes sidechains can be flipped to improve hydrogen bonding and reduce clashes. All (46) such sidechains are listed below:

| Mol | Chain | Res | Type |
|-----|-------|-----|------|
| 1   | A     | 201 | ASN  |
| 1   | A     | 207 | ASN  |
| 1   | A     | 228 | ASN  |
| 1   | A     | 260 | GLN  |
| 1   | A     | 309 | HIS  |
| 1   | A     | 317 | GLN  |
| 1   | A     | 326 | HIS  |
| 1   | A     | 361 | ASN  |
| 1   | A     | 588 | ASN  |
| 1   | A     | 637 | ASN  |
| 1   | A     | 712 | ASN  |
| 1   | A     | 784 | ASN  |
| 1   | A     | 787 | HIS  |
| 2   | B     | 176 | HIS  |
| 2   | B     | 204 | ASN  |
| 2   | B     | 207 | ASN  |
| 2   | B     | 260 | GLN  |
| 2   | B     | 317 | GLN  |
| 2   | B     | 492 | GLN  |
| 2   | B     | 528 | ASN  |
| 2   | B     | 541 | ASN  |

*Continued on next page...*

*Continued from previous page...*

| Mol | Chain | Res | Type |
|-----|-------|-----|------|
| 2   | B     | 588 | ASN  |
| 2   | B     | 784 | ASN  |
| 1   | C     | 201 | ASN  |
| 1   | C     | 207 | ASN  |
| 1   | C     | 228 | ASN  |
| 1   | C     | 260 | GLN  |
| 1   | C     | 309 | HIS  |
| 1   | C     | 317 | GLN  |
| 1   | C     | 326 | HIS  |
| 1   | C     | 361 | ASN  |
| 1   | C     | 588 | ASN  |
| 1   | C     | 637 | ASN  |
| 1   | C     | 784 | ASN  |
| 1   | C     | 787 | HIS  |
| 2   | D     | 176 | HIS  |
| 2   | D     | 204 | ASN  |
| 2   | D     | 207 | ASN  |
| 2   | D     | 260 | GLN  |
| 2   | D     | 317 | GLN  |
| 2   | D     | 338 | ASN  |
| 2   | D     | 492 | GLN  |
| 2   | D     | 528 | ASN  |
| 2   | D     | 541 | ASN  |
| 2   | D     | 588 | ASN  |
| 2   | D     | 784 | ASN  |

### 5.3.3 RNA ⓘ

There are no RNA molecules in this entry.

### 5.4 Non-standard residues in protein, DNA, RNA chains ⓘ

There are no non-standard protein/DNA/RNA residues in this entry.

### 5.5 Carbohydrates ⓘ

There are no monosaccharides in this entry.

## 5.6 Ligand geometry

Of 6 ligands modelled in this entry, 2 could not be matched to an existing wwPDB Chemical Component Dictionary definition at this stage - leaving 4 for Mogul analysis.

In the following table, the Counts columns list the number of bonds (or angles) for which Mogul statistics could be retrieved, the number of bonds (or angles) that are observed in the model and the number of bonds (or angles) that are defined in the Chemical Component Dictionary. The Link column lists molecule types, if any, to which the group is linked. The Z score for a bond length (or angle) is the number of standard deviations the observed value is removed from the expected value. A bond length (or angle) with  $|Z| > 2$  is considered an outlier worth inspection. RMSZ is the root-mean-square of all Z scores of the bond lengths (or angles).

| Mol | Type | Chain | Res | Link | Bond lengths |      |          | Bond angles |      |          |
|-----|------|-------|-----|------|--------------|------|----------|-------------|------|----------|
|     |      |       |     |      | Counts       | RMSZ | # Z  > 2 | Counts      | RMSZ | # Z  > 2 |
| 3   | POV  | A     | 902 | -    | 27,27,51     | 0.39 | 0        | 33,35,59    | 0.37 | 0        |
| 3   | POV  | C     | 902 | -    | 27,27,51     | 0.41 | 0        | 33,35,59    | 0.41 | 0        |
| 3   | POV  | B     | 902 | -    | 51,51,51     | 0.35 | 0        | 57,59,59    | 0.75 | 1 (1%)   |
| 3   | POV  | D     | 902 | -    | 51,51,51     | 0.35 | 0        | 57,59,59    | 0.76 | 1 (1%)   |

In the following table, the Chirals column lists the number of chiral outliers, the number of chiral centers analysed, the number of these observed in the model and the number defined in the Chemical Component Dictionary. Similar counts are reported in the Torsion and Rings columns. '-' means no outliers of that kind were identified.

| Mol | Type | Chain | Res | Link | Chirals | Torsions    | Rings |
|-----|------|-------|-----|------|---------|-------------|-------|
| 3   | POV  | A     | 902 | -    | -       | 9/31/31/55  | -     |
| 3   | POV  | C     | 902 | -    | -       | 10/31/31/55 | -     |
| 3   | POV  | B     | 902 | -    | -       | 29/55/55/55 | -     |
| 3   | POV  | D     | 902 | -    | -       | 29/55/55/55 | -     |

There are no bond length outliers.

All (2) bond angle outliers are listed below:

| Mol | Chain | Res | Type | Atoms     | Z    | Observed(°) | Ideal(°) |
|-----|-------|-----|------|-----------|------|-------------|----------|
| 3   | D     | 902 | POV  | O31-C3-C2 | 2.95 | 117.03      | 108.43   |
| 3   | B     | 902 | POV  | O31-C3-C2 | 2.80 | 116.57      | 108.43   |

There are no chirality outliers.

All (77) torsion outliers are listed below:

| Mol | Chain | Res | Type | Atoms        |
|-----|-------|-----|------|--------------|
| 3   | A     | 902 | POV  | C1-O11-P-O13 |

Continued on next page...

*Continued from previous page...*

| Mol | Chain | Res | Type | Atoms               |
|-----|-------|-----|------|---------------------|
| 3   | A     | 902 | POV  | C1-O11-P-O14        |
| 3   | A     | 902 | POV  | C11-O12-P-O11       |
| 3   | A     | 902 | POV  | O12-C11-C12-N       |
| 3   | B     | 902 | POV  | C1-O11-P-O13        |
| 3   | B     | 902 | POV  | C1-O11-P-O14        |
| 3   | B     | 902 | POV  | C11-O12-P-O11       |
| 3   | B     | 902 | POV  | C11-O12-P-O13       |
| 3   | B     | 902 | POV  | C11-O12-P-O14       |
| 3   | B     | 902 | POV  | C32-C31-O31-C3      |
| 3   | B     | 902 | POV  | O32-C31-O31-C3      |
| 3   | C     | 902 | POV  | C1-O11-P-O12        |
| 3   | C     | 902 | POV  | C1-O11-P-O13        |
| 3   | C     | 902 | POV  | C1-O11-P-O14        |
| 3   | C     | 902 | POV  | C11-O12-P-O11       |
| 3   | C     | 902 | POV  | C11-O12-P-O14       |
| 3   | C     | 902 | POV  | O12-C11-C12-N       |
| 3   | D     | 902 | POV  | C11-O12-P-O11       |
| 3   | D     | 902 | POV  | C11-O12-P-O13       |
| 3   | D     | 902 | POV  | C11-O12-P-O14       |
| 3   | D     | 902 | POV  | C32-C31-O31-C3      |
| 3   | D     | 902 | POV  | O32-C31-O31-C3      |
| 3   | A     | 902 | POV  | C1-O11-P-O12        |
| 3   | B     | 902 | POV  | C1-O11-P-O12        |
| 3   | D     | 902 | POV  | C1-O11-P-O12        |
| 3   | B     | 902 | POV  | O21-C2-C3-O31       |
| 3   | B     | 902 | POV  | C213-C214-C215-C216 |
| 3   | D     | 902 | POV  | C213-C214-C215-C216 |
| 3   | D     | 902 | POV  | C34-C35-C36-C37     |
| 3   | D     | 902 | POV  | C1-C2-C3-O31        |
| 3   | B     | 902 | POV  | C34-C35-C36-C37     |
| 3   | B     | 902 | POV  | C311-C310-C39-C38   |
| 3   | D     | 902 | POV  | O21-C2-C3-O31       |
| 3   | D     | 902 | POV  | C311-C310-C39-C38   |
| 3   | A     | 902 | POV  | C1-C2-C3-O31        |
| 3   | B     | 902 | POV  | C1-C2-C3-O31        |
| 3   | C     | 902 | POV  | C1-C2-C3-O31        |
| 3   | B     | 902 | POV  | C32-C33-C34-C35     |
| 3   | B     | 902 | POV  | O11-C1-C2-O21       |
| 3   | C     | 902 | POV  | O21-C2-C3-O31       |
| 3   | D     | 902 | POV  | C2-C1-O11-P         |
| 3   | B     | 902 | POV  | C2-C1-O11-P         |
| 3   | D     | 902 | POV  | O11-C1-C2-O21       |

*Continued on next page...*



*Continued from previous page...*

| Mol | Chain | Res | Type | Atoms               |
|-----|-------|-----|------|---------------------|
| 3   | D     | 902 | POV  | C212-C213-C214-C215 |
| 3   | D     | 902 | POV  | C32-C33-C34-C35     |
| 3   | B     | 902 | POV  | C214-C215-C216-C217 |
| 3   | A     | 902 | POV  | C11-O12-P-O14       |
| 3   | D     | 902 | POV  | C1-O11-P-O13        |
| 3   | D     | 902 | POV  | C1-O11-P-O14        |
| 3   | B     | 902 | POV  | O11-C1-C2-C3        |
| 3   | D     | 902 | POV  | O11-C1-C2-C3        |
| 3   | D     | 902 | POV  | C214-C215-C216-C217 |
| 3   | B     | 902 | POV  | C212-C213-C214-C215 |
| 3   | B     | 902 | POV  | O12-C11-C12-N       |
| 3   | D     | 902 | POV  | O12-C11-C12-N       |
| 3   | D     | 902 | POV  | C37-C38-C39-C310    |
| 3   | A     | 902 | POV  | O21-C2-C3-O31       |
| 3   | B     | 902 | POV  | C36-C37-C38-C39     |
| 3   | D     | 902 | POV  | C310-C311-C312-C313 |
| 3   | D     | 902 | POV  | C36-C37-C38-C39     |
| 3   | D     | 902 | POV  | C39-C310-C311-C312  |
| 3   | B     | 902 | POV  | C29-C210-C211-C212  |
| 3   | D     | 902 | POV  | C29-C210-C211-C212  |
| 3   | B     | 902 | POV  | C37-C38-C39-C310    |
| 3   | B     | 902 | POV  | C310-C311-C312-C313 |
| 3   | B     | 902 | POV  | O31-C31-C32-C33     |
| 3   | D     | 902 | POV  | O31-C31-C32-C33     |
| 3   | B     | 902 | POV  | C3-C2-O21-C21       |
| 3   | D     | 902 | POV  | C3-C2-O21-C21       |
| 3   | B     | 902 | POV  | C39-C310-C311-C312  |
| 3   | C     | 902 | POV  | O31-C31-C32-C33     |
| 3   | D     | 902 | POV  | O32-C31-C32-C33     |
| 3   | B     | 902 | POV  | O32-C31-C32-C33     |
| 3   | B     | 902 | POV  | O22-C21-O21-C2      |
| 3   | D     | 902 | POV  | O22-C21-O21-C2      |
| 3   | C     | 902 | POV  | O32-C31-C32-C33     |
| 3   | A     | 902 | POV  | O31-C31-C32-C33     |

There are no ring outliers.

4 monomers are involved in 13 short contacts:

| Mol | Chain | Res | Type | Clashes | Symm-Clashes |
|-----|-------|-----|------|---------|--------------|
| 3   | A     | 902 | POV  | 2       | 0            |
| 3   | C     | 902 | POV  | 3       | 0            |
| 3   | B     | 902 | POV  | 4       | 0            |

*Continued on next page...*

Continued from previous page...

| Mol | Chain | Res | Type | Clashes | Symm-Clashes |
|-----|-------|-----|------|---------|--------------|
| 3   | D     | 902 | POV  | 4       | 0            |

The following is a two-dimensional graphical depiction of Mogul quality analysis of bond lengths, bond angles, torsion angles, and ring geometry for all instances of the Ligand of Interest. In addition, ligands with molecular weight > 250 and outliers as shown on the validation Tables will also be included. For torsion angles, if less than 5% of the Mogul distribution of torsion angles is within 10 degrees of the torsion angle in question, then that torsion angle is considered an outlier. Any bond that is central to one or more torsion angles identified as an outlier by Mogul will be highlighted in the graph. For rings, the root-mean-square deviation (RMSD) between the ring in question and similar rings identified by Mogul is calculated over all ring torsion angles. If the average RMSD is greater than 60 degrees and the minimal RMSD between the ring in question and any Mogul-identified rings is also greater than 60 degrees, then that ring is considered an outlier. The outliers are highlighted in purple. The color gray indicates Mogul did not find sufficient equivalents in the CSD to analyse the geometry.

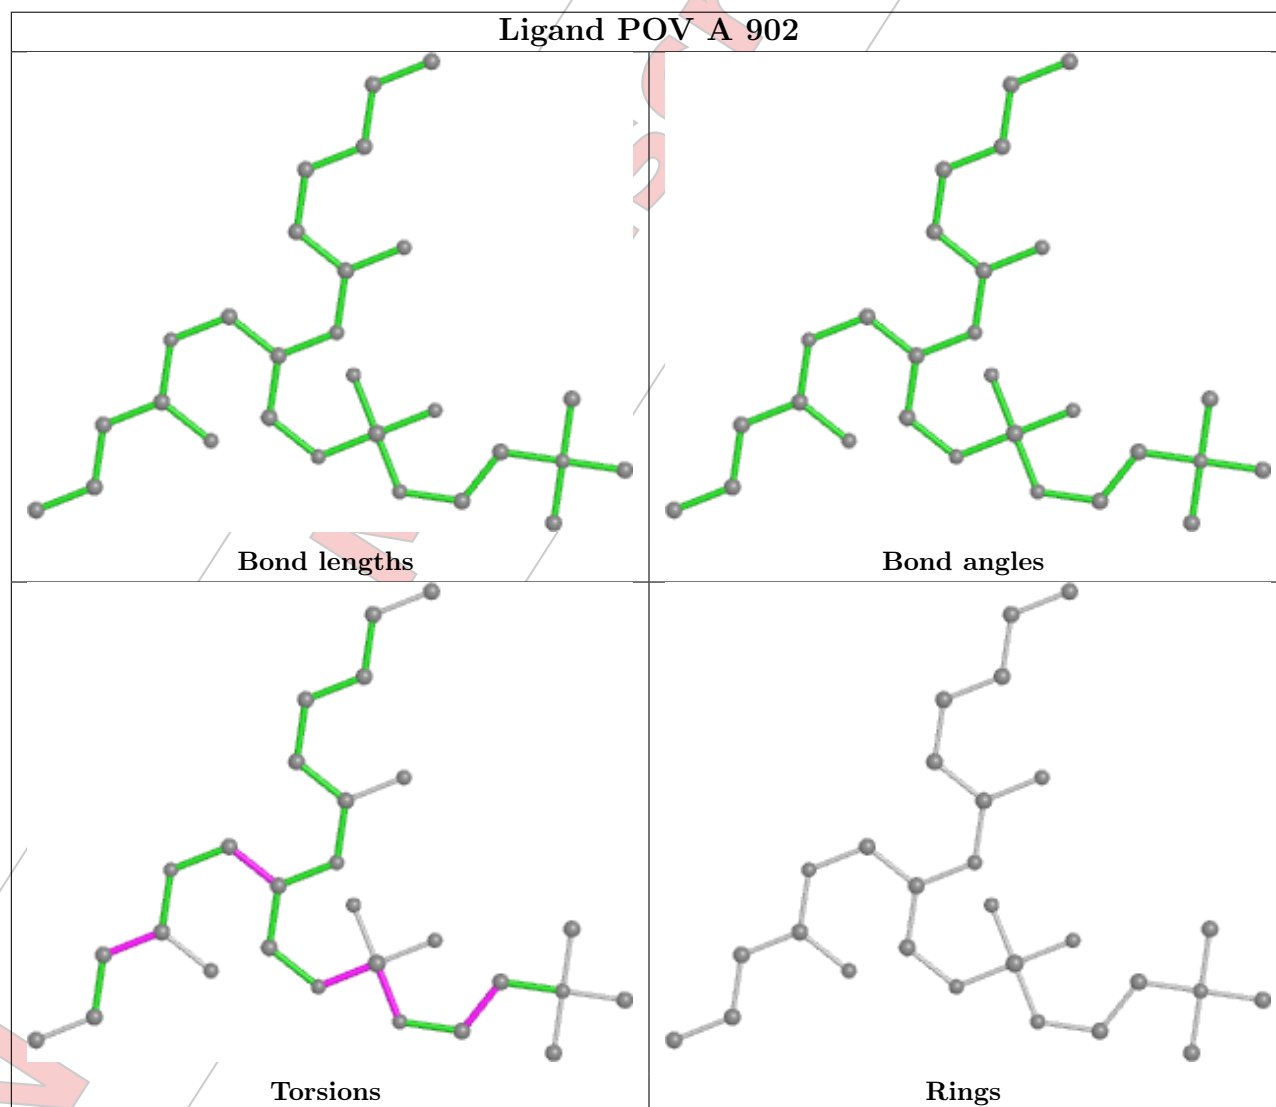

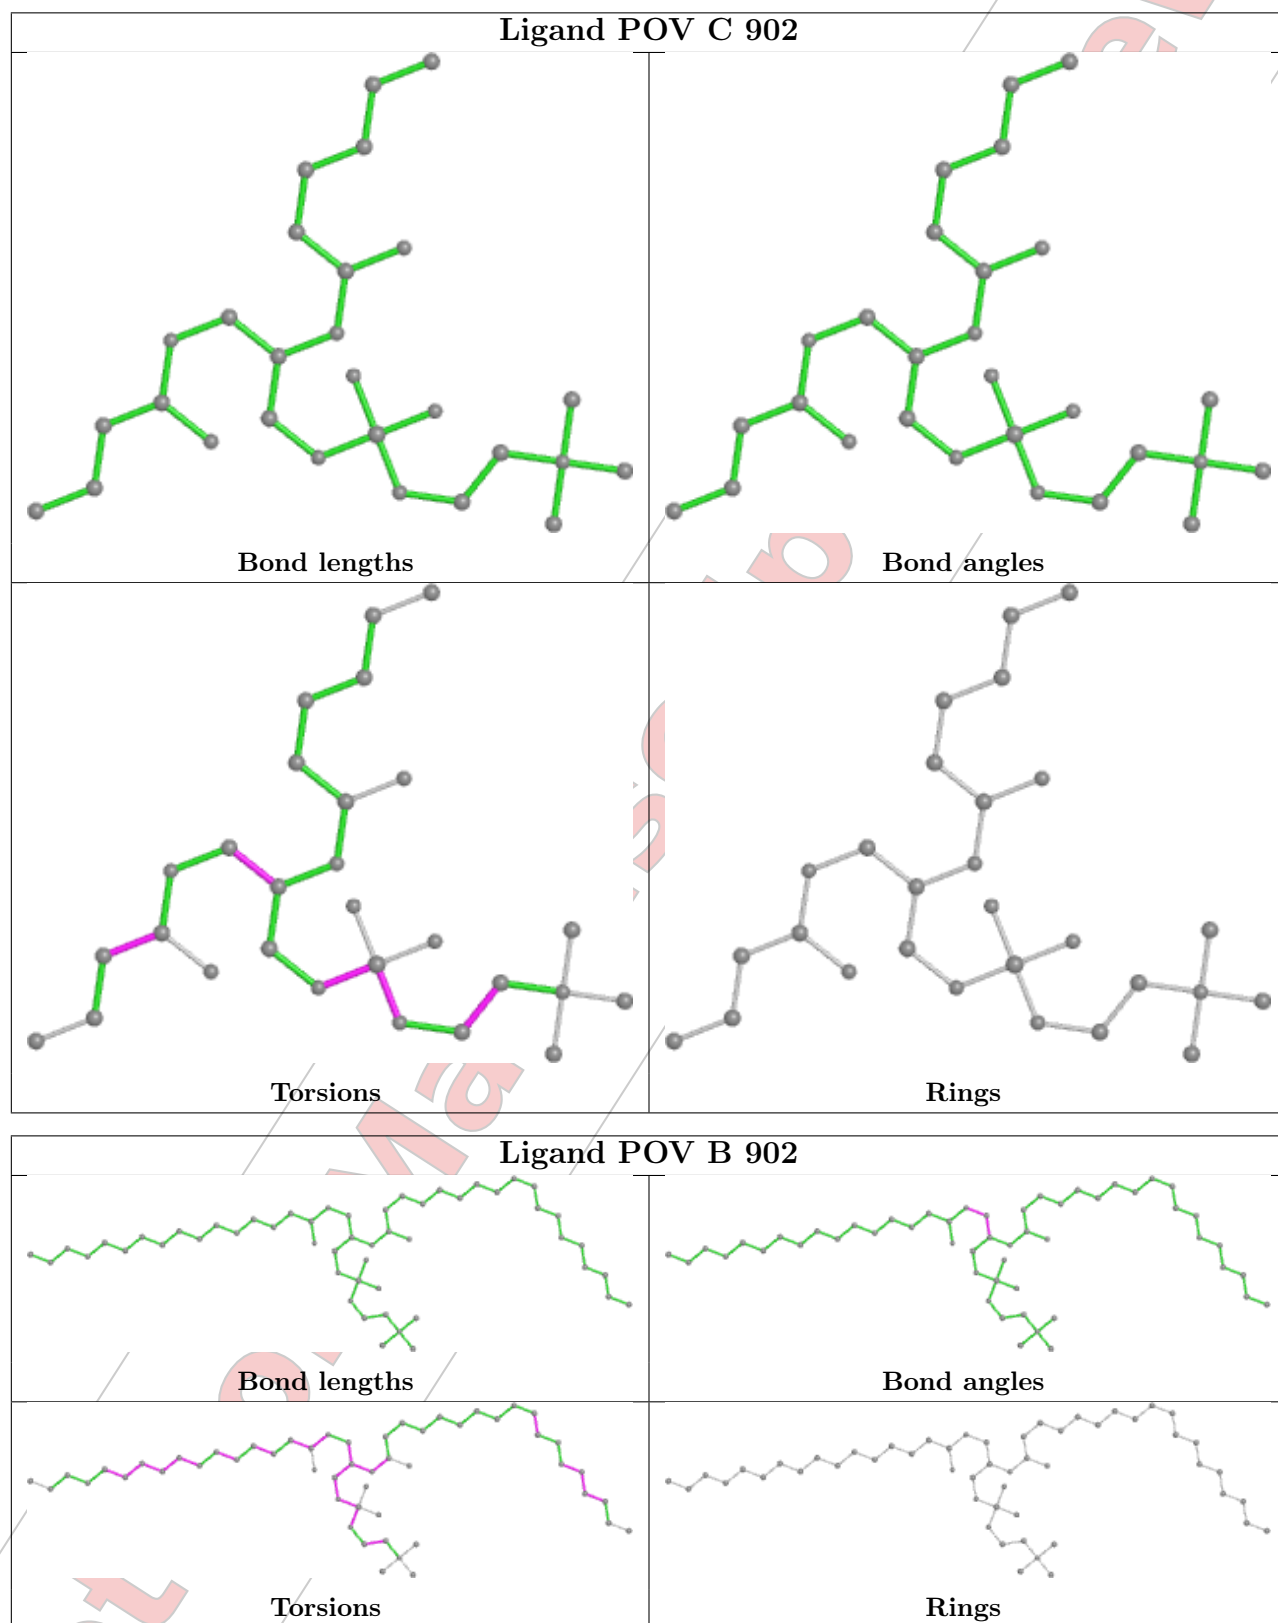

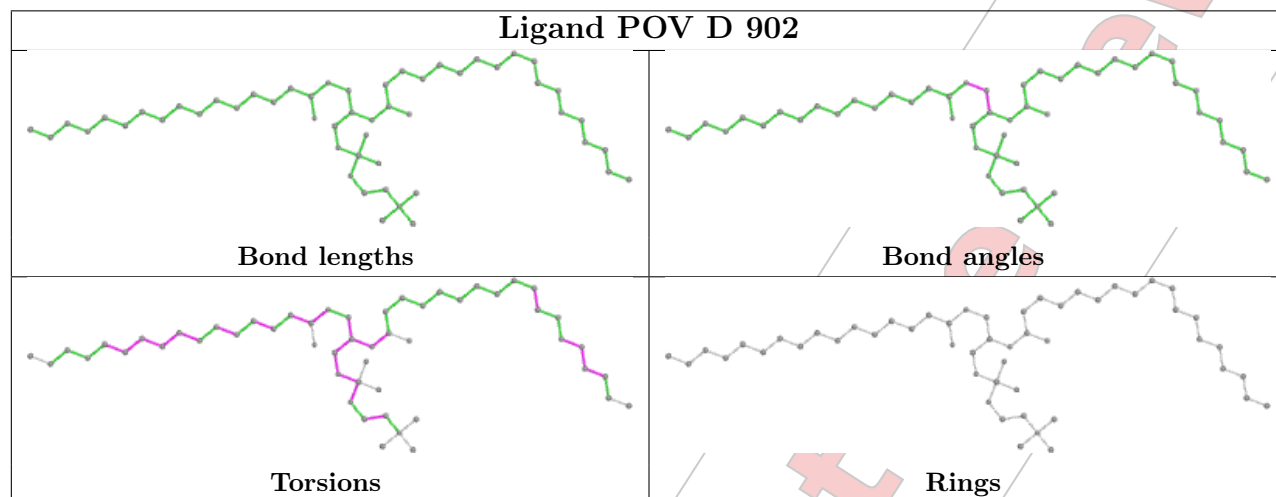

## 5.7 Other polymers [i](#)

There are no such residues in this entry.

## 5.8 Polymer linkage issues [i](#)

The following chains have linkage breaks:

| Mol | Chain | Number of breaks |
|-----|-------|------------------|
| 1   | A     | 2                |
| 1   | C     | 2                |
| 2   | B     | 1                |
| 2   | D     | 1                |

All chain breaks are listed below:

| Model | Chain | Residue-1 | Atom-1 | Residue-2 | Atom-2 | Distance (Å) |
|-------|-------|-----------|--------|-----------|--------|--------------|
| 1     | A     | 533:PHE   | C      | 549:PHE   | N      | 17.07        |
| 1     | C     | 533:PHE   | C      | 549:PHE   | N      | 17.07        |
| 1     | B     | 640:ALA   | C      | 661:ARG   | N      | 12.07        |
| 1     | D     | 640:ALA   | C      | 661:ARG   | N      | 12.07        |
| 1     | A     | 640:ALA   | C      | 661:ARG   | N      | 6.64         |
| 1     | C     | 640:ALA   | C      | 661:ARG   | N      | 6.64         |

## 6 Map visualisation [i](#)

This section contains visualisations of the EMDB entry D\_9100078168. These allow visual inspection of the internal detail of the map and identification of artifacts.

No raw map or half-maps were deposited for this entry and therefore no images, graphs, etc. pertaining to the raw map can be shown.

### 6.1 Orthogonal projections [i](#)

#### 6.1.1 Primary map

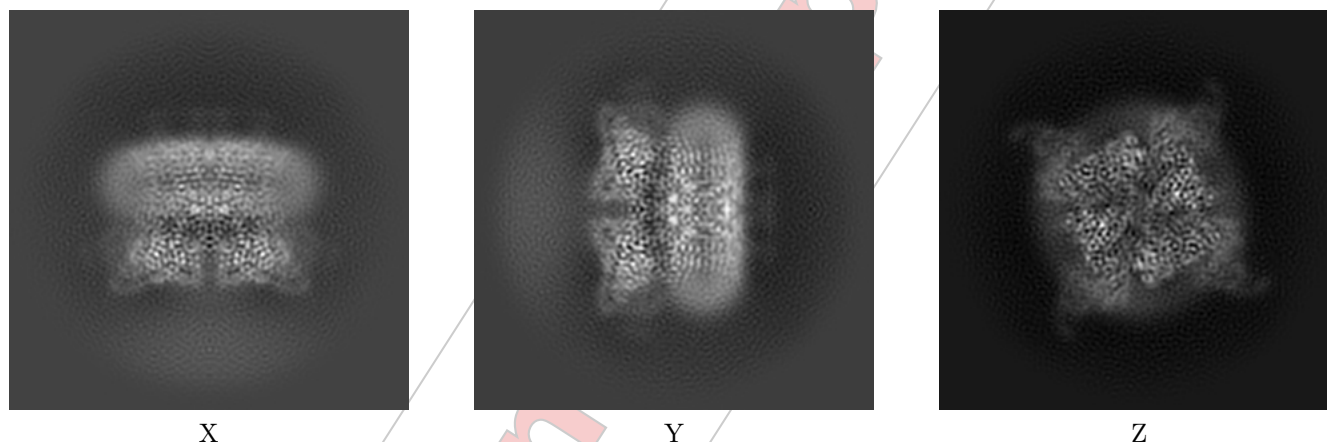

The images above show the map projected in three orthogonal directions.

### 6.2 Central slices [i](#)

#### 6.2.1 Primary map

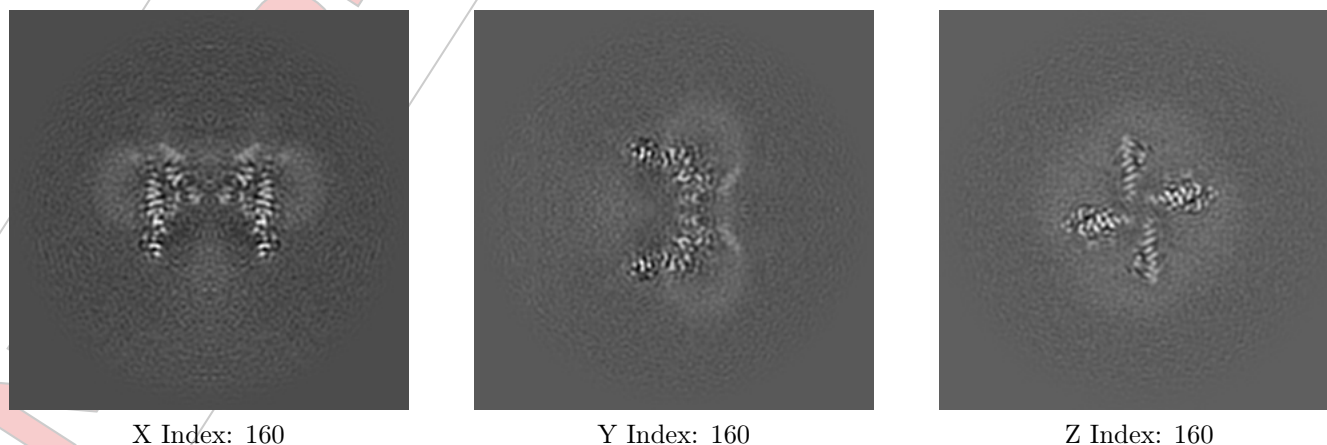

The images above show central slices of the map in three orthogonal directions.

## 6.3 Largest variance slices [i](#)

### 6.3.1 Primary map

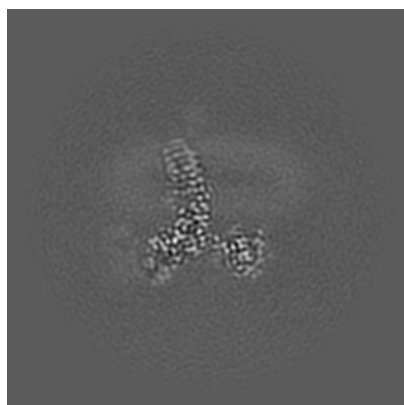

X Index: 122

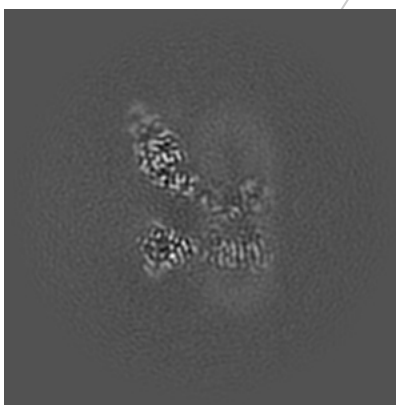

Y Index: 134

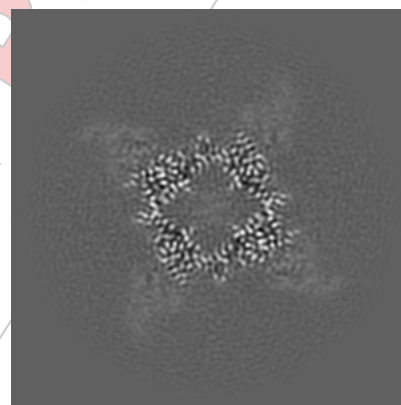

Z Index: 129

The images above show the largest variance slices of the map in three orthogonal directions.

## 6.4 Orthogonal surface views [i](#)

### 6.4.1 Primary map

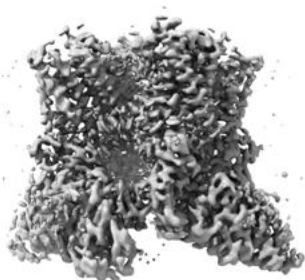

X

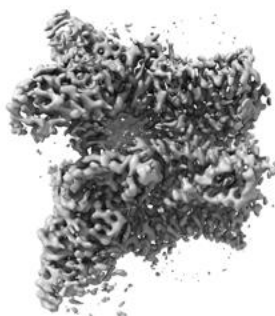

Y

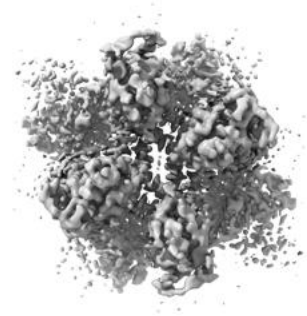

Z

The images above show the 3D surface view of the map at the recommended contour level 0.114. These images, in conjunction with the slice images, may facilitate assessment of whether an appropriate contour level has been provided.



## 6.5 Mask visualisation

This section was not generated. No masks/segmentation were deposited.

Not For Manuscript Review

## 7 Map analysis ⓘ

This section contains the results of statistical analysis of the map.

### 7.1 Map-value distribution ⓘ

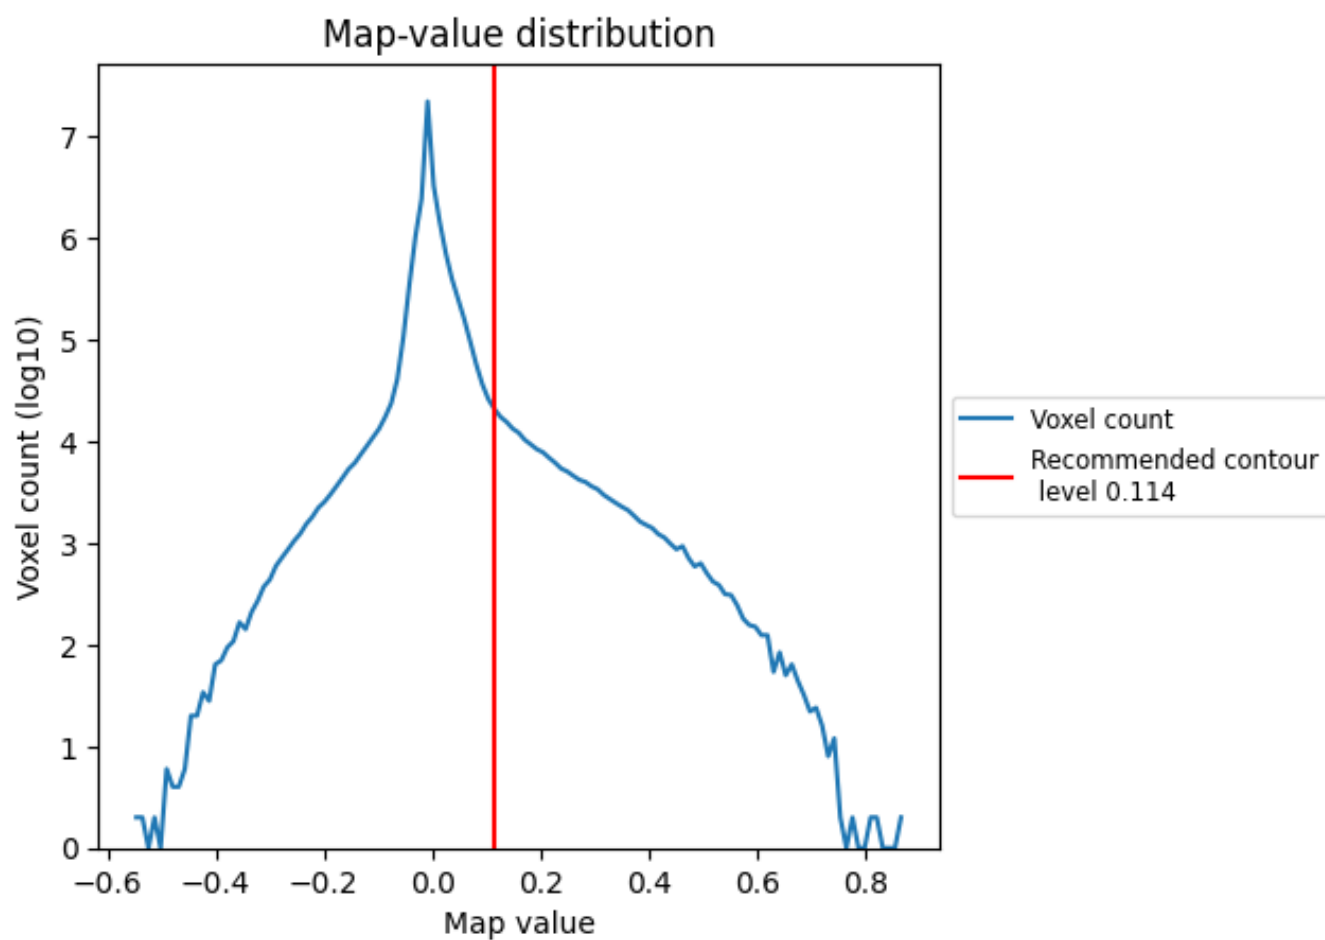

The map-value distribution is plotted in 128 intervals along the x-axis. The y-axis is logarithmic. A spike in this graph at zero usually indicates that the volume has been masked.

## 7.2 Volume estimate [i](#)

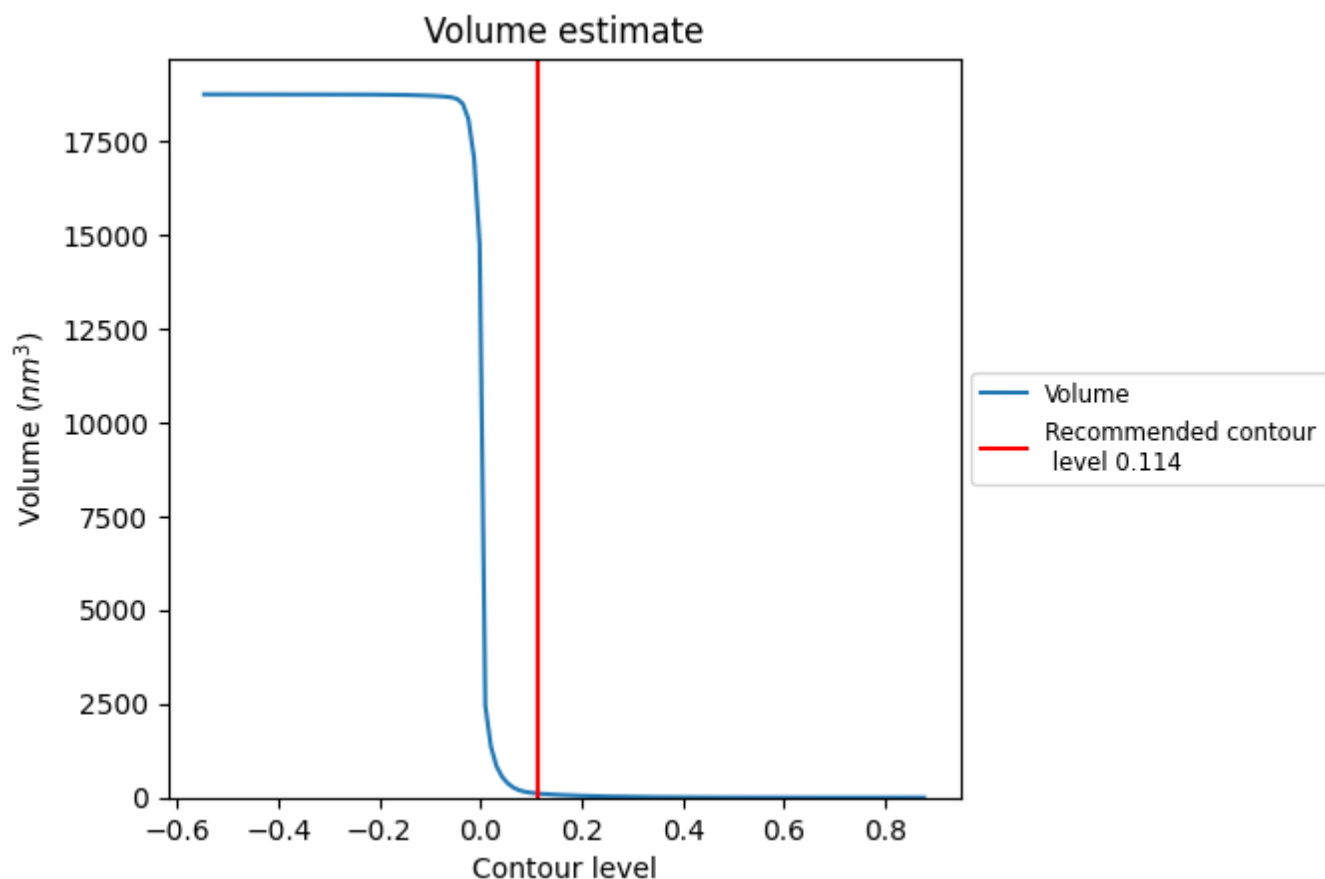

The volume at the recommended contour level is 109 nm<sup>3</sup>; this corresponds to an approximate mass of 98 kDa.

The volume estimate graph shows how the enclosed volume varies with the contour level. The recommended contour level is shown as a vertical line and the intersection between the line and the curve gives the volume of the enclosed surface at the given level.

### 7.3 Rotationally averaged power spectrum ⓘ

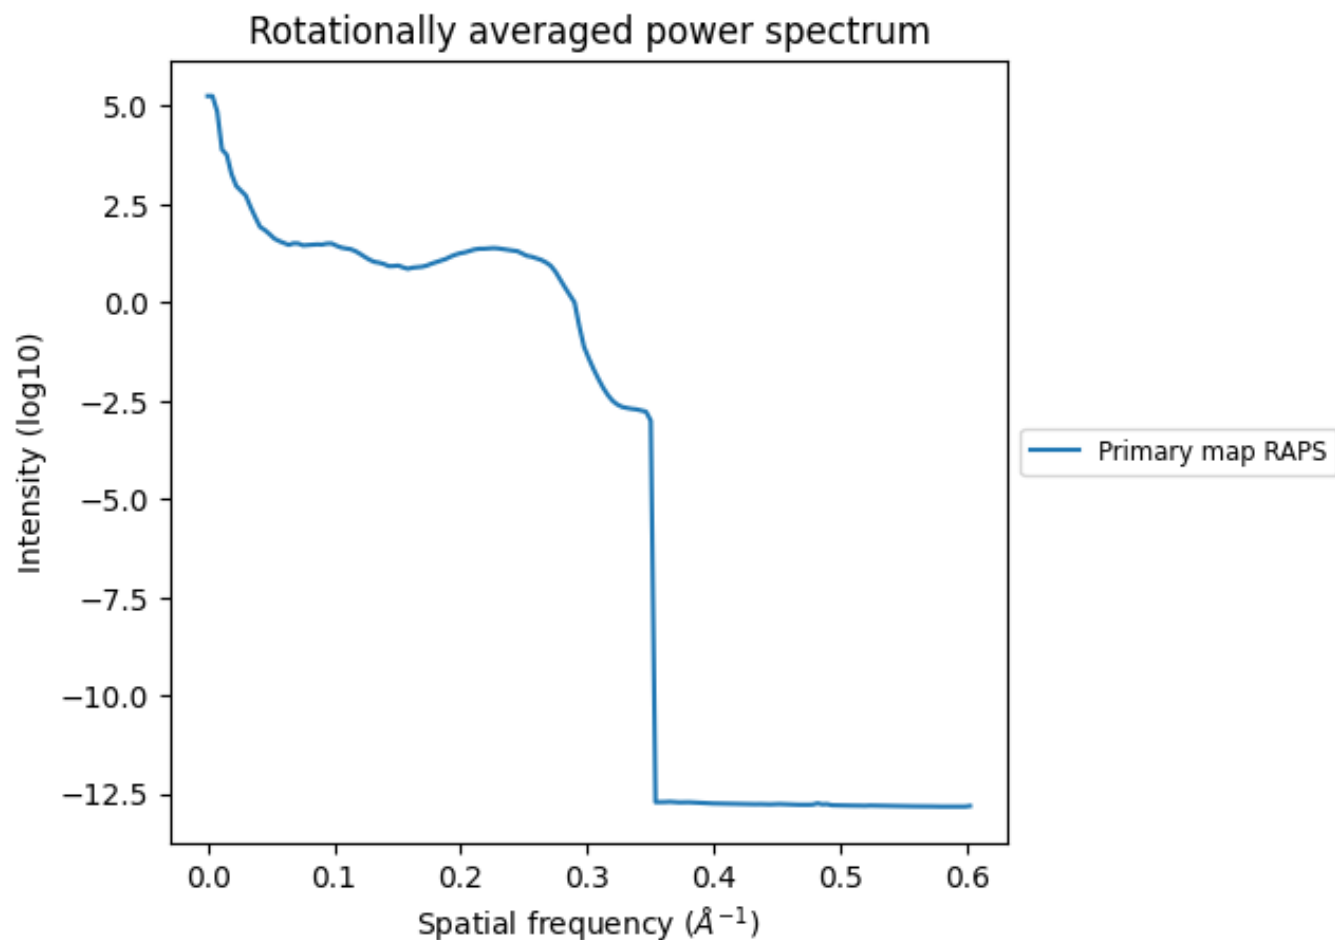

## 8 Fourier-Shell correlation ⓘ

This section was not generated. No FSC curve or half-maps provided.

Not For Manuscript Review

## 9 Map-model fit ⓘ

This section contains information regarding the fit between EMDB map D\_9100078168 and PDB model D\_9100078168. Per-residue inclusion information can be found in section 3 on page 5.

### 9.1 Map-model overlay ⓘ

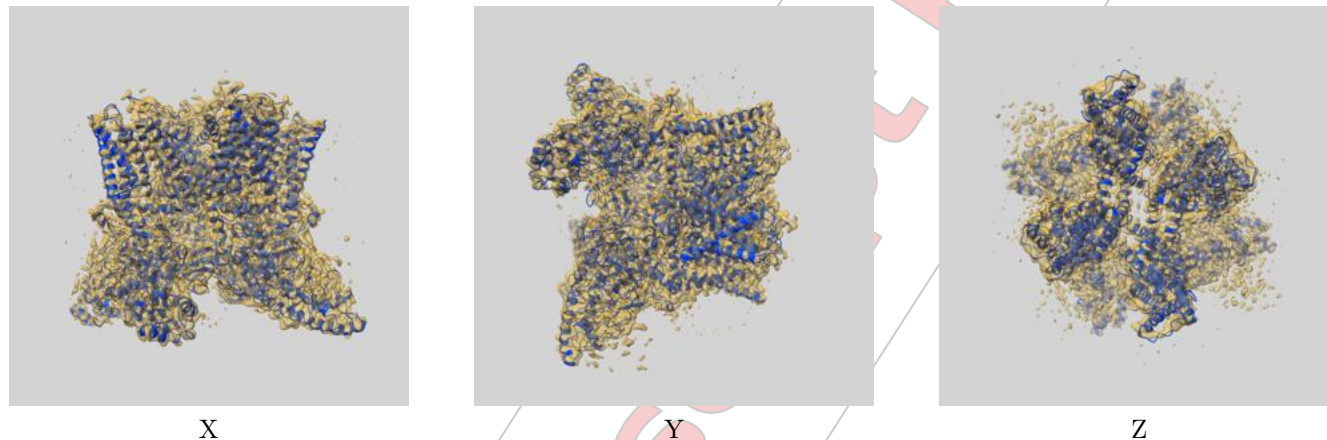

The images above show the 3D surface view of the map at the recommended contour level 0.114 at 50% transparency in yellow overlaid with a ribbon representation of the model coloured in blue. These images allow for the visual assessment of the quality of fit between the atomic model and the map.



## 9.2 Q-score mapped to coordinate model [i](#)

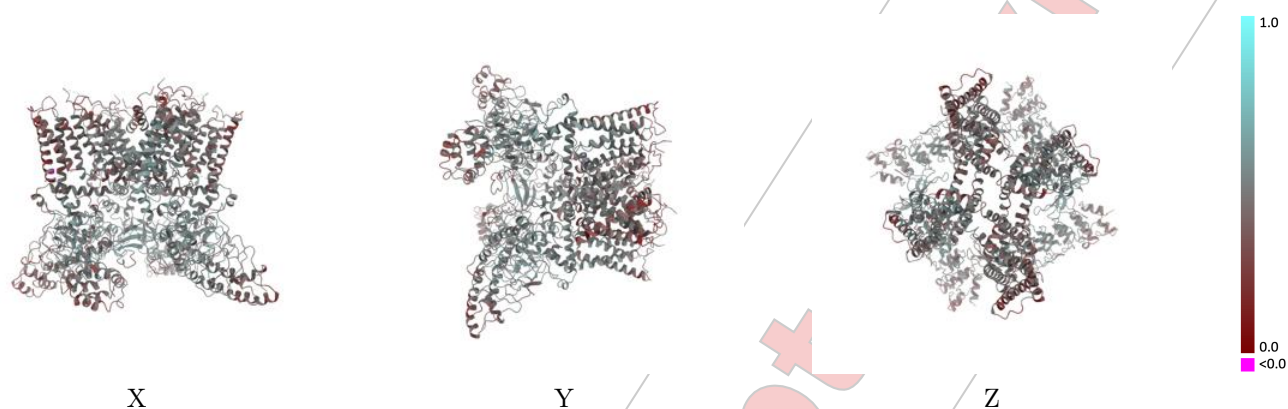

The images above show the model with each residue coloured according to its Q-score. This shows their resolvability in the map with higher Q-score values reflecting better resolvability. Please note: Q-score is calculating the resolvability of atoms, and thus high values are only expected at resolutions at which atoms can be resolved. Low Q-score values may therefore be expected for many entries.

## 9.3 Atom inclusion mapped to coordinate model [i](#)

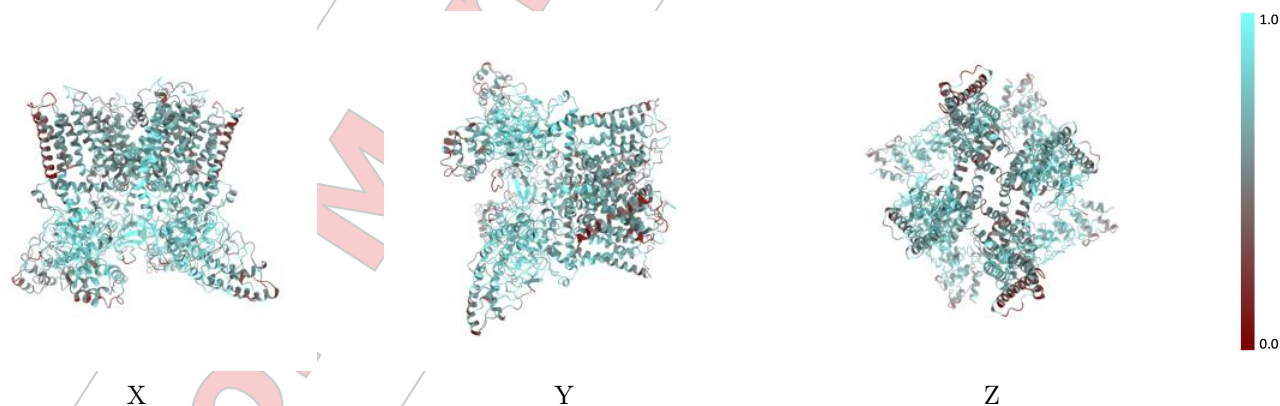

The images above show the model with each residue coloured according to its atom inclusion. This shows to what extent they are inside the map at the recommended contour level (0.114).

## 9.4 Atom inclusion ⓘ

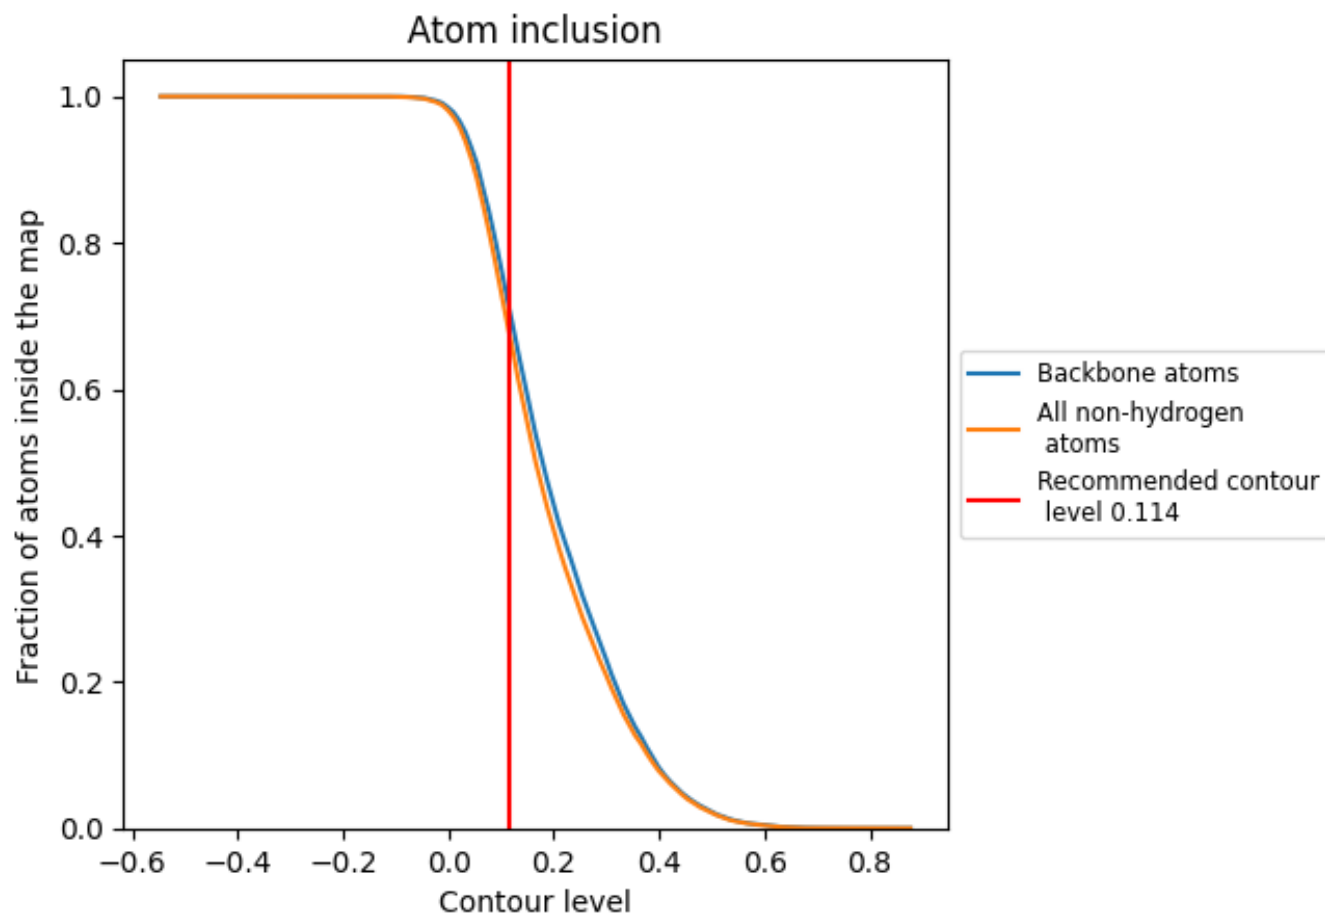

At the recommended contour level, 71% of all backbone atoms, 68% of all non-hydrogen atoms, are inside the map.

## 9.5 Map-model fit summary ⓘ

The table lists the average atom inclusion at the recommended contour level (0.114) and Q-score for the entire model and for each chain.

| Chain | Atom inclusion                                                                           | Q-score                                                                                  |
|-------|------------------------------------------------------------------------------------------|------------------------------------------------------------------------------------------|
| All   |  0.6802 |  0.4550 |
| A     |  0.6662 |  0.4480 |
| B     |  0.7034 |  0.4700 |
| C     |  0.6623 |  0.4340 |
| D     |  0.7073 |  0.4670 |

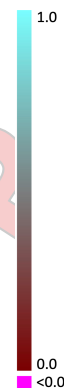

Supplement: Supplementary file 4 [file 1]
